# Supplementary material
Source: PubMed Central journal article supplement (PMC3087302)

**Ethylene in Organic Synthesis. Repetitive Hydrovinylation of Alkenes for Highly  
Enantioselective Syntheses of Pseudopterosins**

Daniel J. Mans, G. Adam Cox, T. V. RajanBabu\*  
Department of Chemistry, The Ohio State University, Columbus, OH 43210, USA

**Supporting Online Material**

**Table of Contents**

|                                                                                                                                                                                 |     |
|---------------------------------------------------------------------------------------------------------------------------------------------------------------------------------|-----|
| General Methods                                                                                                                                                                 | S3  |
| 2,3-Dimethoxy-1-methyl-4-vinylbenzene ( <b>6</b> )                                                                                                                              | S3  |
| ( <i>S</i> )-1-(But-3-en-2-yl)-2,3-dimethoxy-4-methylbenzene ( <b>7</b> )                                                                                                       | S4  |
| ( <i>S</i> )-3-(2,3-Dimethoxy-4-methylphenyl)butan-1-ol                                                                                                                         | S5  |
| ( <i>S</i> )-1-(4-Iodobutan-2-yl)-2,3-dimethoxy-4-methylbenzene ( <b>8</b> )                                                                                                    | S5  |
| ( <i>S</i> )-4-(2,3-Dimethoxy-4-methylphenyl)pentanenitrile ( <b>9</b> )                                                                                                        | S6  |
| ( <i>S</i> )-5,6-Dimethoxy-4,7-dimethyl-3,4-dihydronaphthalen-1(2 <i>H</i> )-one ( <b>10</b> )                                                                                  | S6  |
| ( <i>S</i> )-7,8-Dimethoxy-1,6-dimethyl-4-vinyl-1,2-dihydronaphthalene ( <b>11</b> )                                                                                            | S7  |
| ( <i>S</i> )-4-(( <i>S</i> )-But-3-en-2-yl)-7,8-dimethoxy-1,6-dimethyl-1,2-dihydronaphthalene ( <b>12a</b> )                                                                    | S7  |
| ( <i>S</i> )-3-(( <i>S</i> )-5,6-Dimethoxy-4,7-dimethyl-3,4-dihydronaphthalen-1-yl)butan-1-ol ( <b>13</b> )                                                                     | S8  |
| ( <i>S</i> )-3-((1 <i>R</i> ,4 <i>S</i> )-5,6-Dimethoxy-4,7-dimethyl-1,2,3,4-tetrahydronaphthalen-1-yl)butan-1-ol ( <b>14a</b> )                                                | S9  |
| (3 <i>S</i> ,3 <i>aR</i> ,6 <i>S</i> )-7,8-Dimethoxy-3,6,9-trimethyl-2,3,3 <i>a</i> ,4,5,6-hexahydro-1 <i>H</i> -phenalene-1-one ( <b>16</b> )                                  | S9  |
| (1 <i>S</i> ,3 <i>aR</i> ,4 <i>S</i> )-8,9-Dimethoxy-1,4,7-trimethyl-2,3,3 <i>a</i> ,4-tetrahydro-1 <i>H</i> -phenalene ( <b>17</b> )                                           | S10 |
| 2-Methyl-1-tri- <i>n</i> -butylstannylpropene                                                                                                                                   | S11 |
| (1 <i>S</i> ,3 <i>aR</i> ,4 <i>S</i> )-8,9-Dimethoxy-1,4,7-trimethyl-6-(2-methylprop-1-enyl)-2,3,3 <i>a</i> ,4-tetrahydro-1 <i>H</i> -phenalene ( <b>17A</b> )                  | S11 |
| (1 <i>S</i> ,3 <i>S</i> ,3 <i>aR</i> ,6 <i>S</i> )-7,8-Dimethoxy-3,6,9-trimethyl-1-(2-methylprop-1-enyl)-2,3,3 <i>a</i> ,4,5,6-hexahydro-1 <i>H</i> -phenalene ( <b>1B+2B</b> ) | S12 |
| (1 <i>S</i> ,3 <i>S</i> ,3 <i>aR</i> ,6 <i>S</i> )-7,8-Dimethoxy-3,6,9-trimethyl-1-vinyl-2,3,3 <i>a</i> ,4,5,6-hexahydro-1 <i>H</i> -phenalene ( <b>18</b> )                    | S12 |
| (1 <i>S</i> ,3 <i>S</i> ,3 <i>aR</i> ,6 <i>S</i> )-7,8-Dimethoxy-3,6,9-trimethyl-1-formyl-2,3,3 <i>a</i> ,4,5,6-hexahydro-1 <i>H</i> -phenalene                                 | S13 |
| (1 <i>S</i> ,3 <i>S</i> ,3 <i>aR</i> ,6 <i>S</i> )-7,8-Dimethoxy-3,6,9-trimethyl-1-(2-methylprop-1-enyl)-2,3,3 <i>a</i> ,4,5,6-hexahydro-1 <i>H</i> -phenalene ( <b>2B</b> )    | S14 |
| <b>References</b>                                                                                                                                                               | S14 |
| <b>NMR Spectra and Chromatograms</b>                                                                                                                                            | S15 |
| <sup>1</sup> H and <sup>13</sup> C NMR of styrene <b>6</b>                                                                                                                      | S15 |
| <sup>1</sup> H and <sup>13</sup> C NMR of 3-arylbutene <b>7</b>                                                                                                                 | S17 |
| Chiral stationary phase GC separation: Racemic and enantiopure <b>7</b>                                                                                                         | S19 |
| <sup>1</sup> H and <sup>13</sup> C NMR of hydroboration product of <b>7</b>                                                                                                     | S21 |

|                                                                                                                                             |     |
|---------------------------------------------------------------------------------------------------------------------------------------------|-----|
| <sup>1</sup> H and <sup>13</sup> C NMR of iodide <b>8</b> from hydroboration followed Ph <sub>3</sub> P/I <sub>2</sub> reaction of <b>7</b> | S23 |
| <sup>1</sup> H and <sup>13</sup> C NMR of nitrile <b>9</b>                                                                                  | S25 |
| <sup>1</sup> H and <sup>13</sup> C NMR of hydrolysis product (acid) of nitrile <b>9</b>                                                     | S27 |
| <sup>1</sup> H and <sup>13</sup> C NMR of ketone <b>10</b>                                                                                  | S29 |
| <sup>1</sup> H and <sup>13</sup> C NMR of vinyl triflate from ketone <b>10</b> (+ KHMDS, PhNTf <sub>2</sub> )                               | S31 |
| <sup>1</sup> H and <sup>13</sup> C NMR of diene <b>11</b>                                                                                   | S33 |
| <sup>1</sup> H and <sup>13</sup> C NMR of HV product <b>12a</b>                                                                             | S35 |
| Gas chromatography separation (methyl silicone) of crude reaction product HV of <b>11</b>                                                   | S37 |
| Chiral stationary phase GC separation: HV products <b>12a</b> (major)/ <b>12b</b> (minor)                                                   | S38 |
| Chiral stationary phase GC separation: racemic HV products ( <b>12a + 12b</b> )                                                             | S39 |
| <sup>1</sup> H and <sup>13</sup> C NMR of HV product <b>12b</b>                                                                             | S40 |
| Chiral stationary phase GC separation: HV products <b>12a</b> (minor)/ <b>12b</b> (major)                                                   | S43 |
| <sup>1</sup> H and <sup>13</sup> C NMR of alcohol <b>13</b>                                                                                 | S44 |
| <sup>1</sup> H and <sup>13</sup> C NMR of reduction product <b>14a</b>                                                                      | S46 |
| <sup>1</sup> H NMR of HV product <b>14b</b>                                                                                                 | S48 |
| <sup>1</sup> H and <sup>13</sup> C NMR of ketone <b>16</b>                                                                                  | S49 |
| ORTEP Diagram and Conformation of <b>16</b>                                                                                                 | S51 |
| <sup>1</sup> H and <sup>13</sup> C NMR of diene <b>17</b>                                                                                   | S52 |
| <sup>1</sup> H and <sup>13</sup> C NMR product <b>2B + 3B</b> (Fig 4, A)                                                                    | S54 |
| <sup>1</sup> H and <sup>13</sup> C NMR of alkene <b>18</b>                                                                                  | S57 |
| Gas chromatography (methyl silicone) of <b>18</b>                                                                                           | S59 |
| <sup>1</sup> H and <sup>13</sup> C NMR of alkene <b>19</b>                                                                                  | S60 |
| Gas chromatography (methyl silicone) of alkene <b>19</b>                                                                                    | S62 |
| <sup>1</sup> H and <sup>13</sup> C NMR of aldehyde from ozonolysis of alkene <b>19</b>                                                      | S63 |
| <sup>1</sup> H and <sup>13</sup> C NMR of alkene <b>3B</b>                                                                                  | S65 |

**General methods.** Reactions requiring air-sensitive manipulations were conducted under an inert atmosphere of nitrogen using Schlenk techniques or in a Vacuum Atmospheres glovebox. Dichloromethane (DCM) was distilled from calcium hydride under a dry atmosphere and stored over molecular sieves. Tetrahydrofuran (THF) was distilled under nitrogen from sodium/benzophenone ketyl. The ligands<sup>1</sup> and Na<sup>+</sup>[[3,5-(CF<sub>3</sub>)<sub>2</sub>C<sub>6</sub>H<sub>3</sub>]<sub>4</sub>B]<sup>-</sup> (NaBARF)<sup>2</sup> were prepared according to the literature. Ethylene (99.5%) was purchased from Matheson Inc., and passed through Drierite® before use. Analytical TLC was performed on precoated (0.25 mm) silica gel 60 F254 plates. Flash column chromatography was carried out on silica gel 40. Enantiomeric excesses of chiral compounds were determined by chiral stationary phase gas chromatographic analyses, which were performed with Cyclodex B (25 m x 0.25 mm, 0.12 mm film thickness), Chiraldex B-PH (30 m x 0.25 mm, 0.12 μm film thickness), or Cyclosil (25 m x 0.25 mm, 0.12 μm film thickness) capillary GC columns. Optical rotations were recorded the sodium D line in chloroform.

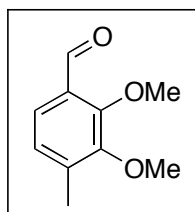

**2,3-Dimethoxy-4-methylbenzaldehyde:** A 500 mL three-necked flask equipped with a magnetic stirring bar, stopper, addition funnel and nitrogen inlet was flame-dried and purged with nitrogen. The flask was charged with 2,3-dimethoxytoluene (10.0 mL, 67.35 mmol) and freshly distilled *N,N,N',N'*-tetramethylethylenediamine TMEDA (2.52 mL, 16.84 mmol, 0.25 equiv.) dissolved in anhydrous hexanes (200 mL). A 1.7 M solution of *t*-butyl lithium in pentane (47.5 mL, 80.82 mmol, 1.2 equiv.) was added dropwise via addition funnel over 30 min. The resulting cloudy yellow solution was allowed to stir at room temperature overnight (16 h). The reaction vessel was cooled to 0° C and freshly distilled, degassed, anhydrous DMF (10.4 mL, 134.70 mmol, 2.0 equiv.) was added dropwise over 10 min. The reaction vessel was warmed to room temperature and allowed to stir for 1 h. The reaction was quenched by the slow addition of water (20 mL) followed by the addition of 2 N HCl until the pH of the solution was neutral. The reaction mixture was poured into water (200 mL) and extracted with ether (3 x 50 mL). The organic layers were combined and dried over MgSO<sub>4</sub>, filtered, and evaporated to give the crude aldehyde which was purified via flash column chromatography (*R<sub>f</sub>* = 0.40, hexanes-ethyl acetate, 9:1) to yield the product as a pale yellow oil (8.95 g, 49.68 mmol, 74%). <sup>1</sup>H NMR (400 MHz, CDCl<sub>3</sub>) δ 10.32 (s, 1H), 7.47 (d, 1H, *J* = 8.0 Hz), 6.99 (d, 1H, *J* = 8.0 Hz), 3.98 (s, 3H), 3.85 (s, 3H), 2.31 (s, 3H). <sup>13</sup>C NMR (100 MHz, CDCl<sub>3</sub>) δ 189.8, 156.4, 151.7, 140.6, 128.6, 126.3, 123.0, 62.2, 60.4, 16.7. IR (neat) 2855, 2743, 1688, 1596, 1464, 1257, 1253, 1071, 1023 cm<sup>-1</sup>.

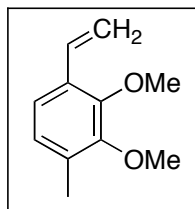

**2,3-Dimethoxy-1-methyl-4-vinylbenzene (6):** A 500 mL three-necked flask equipped with magnetic stirring bar, stoppers and reflux condenser fitted with a nitrogen inlet was flame-dried and purged with nitrogen. The flask was charged with KHMDS (5.486 g, 27.50 mmol, 1.2 equiv.) dissolved in anhydrous THF (170 mL). Methyltriphenylphosphonium bromide (9.824 g, 27.50 mmol, 1.2 equiv.) was added in small portions and the reaction mixture was allowed to stir for 1 h. A solution of the aldehyde from the previous step (4.130 g, 22.92 mmol) in anhydrous THF (50 mL) was added dropwise via syringe and then heated to reflux in

an oil bath. The reaction was allowed to reflux overnight (16 h). The vessel was allowed to cool to room temperature, then the reaction mixture was diluted with pentane (150 mL) and cooled to 0° C to induce precipitation of triphenylphosphine oxide. The reaction mixture was then passed through a plug of Celite, followed by rinsing of the reaction vessel with pentane (3 x 50 mL). The crude styrene was purified via flash column chromatography ( $R_f = 0.36$ , hexanes-ethyl acetate, 19:1) to yield **6** as a colorless oil (3.78 g, 20.98 mmol, 92%).  $^1\text{H}$  NMR (400 MHz,  $\text{CDCl}_3$ )  $\delta$  7.16 (d, 1H,  $J = 8.0$  Hz), 6.98 (dd, 1H,  $J = 10.8, 17.7$  Hz), 6.88 (d, 1H,  $J = 8.0$  Hz), 5.72 (dd, 1H,  $J = 1.4, 17.7$  Hz), 5.25 (dd, 1H,  $J_{1,2} = 1.4, 10.8$  Hz), 3.84 (s, 6H), 2.26 (s, 3H).  $^{13}\text{C}$  NMR (100 MHz,  $\text{CDCl}_3$ )  $\delta$  151.8, 150.9, 132.1, 131.4, 130.2, 126.0, 120.8, 114.4, 61.0, 60.4, 16.1. IR (neat) 1824, 1625, 1601, 1567, 1284, 1222, 1066, 1024  $\text{cm}^{-1}$ . HRMS (ESI);  $m/z$  201.0898 ( $[\text{M} + \text{Na}]$ ); exact mass calculated for  $\text{C}_{11}\text{H}_{14}\text{O}_2\text{Na}$ , 201.0891.

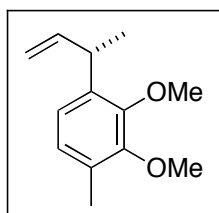

**(S)-1-(But-3-en-2-yl)-2,3-dimethoxy-4-methylbenzene (7):** *Precatalyst preparation:* In a glovebox, NaBARF (56.0 mg, 0.063 mmol, 1.4 mol%), (*R*)-2,2'-binaphthoyl-benzyl-(*S*)-[1-(1-naphthylethyl)]aminoylphosphine (**L1**, 36.4 mg, 0.063 mmol, 1.4 mol%), and [(allyl)NiBr] $_2$  (10.2 mg, 0.032 mmol, 0.7 mol%) were weighed into separate glass vials. The phosphoramidite

ligand was dissolved in anhydrous DCM (1.0 mL) and transferred to the vial containing [(allyl)NiBr] $_2$ , followed by 1.0 mL rinsing of the source vial. The resulting yellow solution of phosphoramidite ligand and [(allyl)NiBr] $_2$  was transferred to the vial containing NaBARF, followed by 1.0 mL rinsing of the source vial. The resulting orange-yellow solution was diluted with DCM (10.0 mL) and allowed to stand for 1.5 h. *Asymmetric hydrovinylation:* A 100 mL three-necked flask equipped with a rubber septum, flow-controlled nitrogen inlet, thermometer, and magnetic stirring bar was flame-dried and purged with nitrogen. The vessel was charged with anhydrous DCM (35 mL). The catalyst solution prepared above was transferred to the reaction vessel via cannula, followed by 2.0 mL rinsing of the source vial. The system was closed at the flow-controlled stopcock and cooled to -80 °C in a dry ice/acetone bath, creating a small vacuum. A strong flow of dry ethylene was introduced via needle through the septum to relieve the vacuum and then the atmosphere of the vessel was evacuated three times via syringe to remove any remaining nitrogen. The flow of ethylene was adjusted to maintain a pressure of 1 atm by releasing excess gas through an oil bubbler. A solution of the styrene from previous experiment (**6**) (806.0 mg, 4.52 mmol) in anhydrous DCM (3.0 mL), followed by 1.0 mL rinsing of the source vial was introduced via syringe as to not increase the reaction temperature above -80 °C. The reaction mixture was allowed to stir at -80 °C for 2 h. The ethylene needle was then removed and the reaction was exposed to air and water (10 mL) was added to quench the reaction. The resulting mixture was poured into water (30 mL) and extracted with ether (3 x 15 mL). The organic layers were combined, dried over  $\text{MgSO}_4$ , and concentrated to give the crude hydrovinylation product, which was then eluted through a plug of silica with pentane to remove any nickel salts. The eluent was concentrated to yield (**7**) as a colorless oil (931.7 mg, 4.52 mmol, >99%, >95% ee).  $^1\text{H}$  NMR (400 MHz,  $\text{CDCl}_3$ )  $\delta$  6.90-6.83 (AB quartet, 2H,  $\nu_A = 6.89$ ,  $\nu_B = 6.84$ ,  $J_{AB} = 8.0$  Hz), 6.04 (ddd, 1H,  $J = 6.0, 10.4, 16.6$  Hz), 5.08-5.03 (m, 2H), 3.92-3.81 (m, 7H, containing 3.87 (s, 3H), 3.85 (s, 3H)), 2.26 (s, 3H), 1.34 (d, 3H,  $J = 6.8$  Hz).  $^{13}\text{C}$  NMR (100 MHz,  $\text{CDCl}_3$ )  $\delta$  151.6, 150.8, 143.5, 137.5, 130.2, 125.8, 122.4, 113.0, 60.9, 60.1, 36.0, 20.6, 15.9.  $[\alpha]_D^{20} -35.0$  ( $c$  1.24,  $\text{CHCl}_3$ ), IR (neat) 1636, 1461, 1277,

1025  $\text{cm}^{-1}$ . HRMS (ESI);  $m/z$  229.1191 ( $[\text{M} + \text{Na}]$ ); exact mass calculated for  $\text{C}_{13}\text{H}_{18}\text{O}_2\text{Na}$ , 229.1199. GC (Cyclodex B-Ph, 85 °C isotherm):  $t_{\text{R}} = 99.07$  (R), 100.74 min (S).

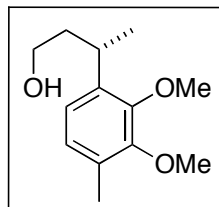

**(S)-3-(2,3-Dimethoxy-4-methylphenyl)butan-1-ol:** A 100 mL three-necked flask equipped with magnetic stirring bar, stopper, thermometer, and nitrogen inlet was flame-dried and purged with nitrogen. The flask was charged with olefin **7** (771.0 mg, 3.74 mmol) dissolved in anhydrous THF (40 mL). 9-BBN dimer (913.0 mg, 3.74 mmol, 1.0 equiv.) was added in small portions and the reaction mixture was allowed to stir at room temperature for 2 h. The vessel was cooled to 0 °C in an ice/water bath and 4 M NaOH (7.5 mL) was added dropwise, maintaining the internal temperature of the vessel below 5 °C. A solution of ~30%  $\text{H}_2\text{O}_2$  (4.7 mL) was then added dropwise, maintaining the internal temperature of the vessel below 5 °C. The vessel was allowed to warm to room temperature and stir for an additional 0.5 h. The mixture was then diluted with ether (20 mL) and neutralized with 10%  $\text{H}_2\text{SO}_4$  until pH ~7 was achieved. The whole was poured into water (20 mL) and extracted with ether (3 x 15 mL). The organic layers were combined and dried over  $\text{MgSO}_4$ , and concentrated to give the crude alcohol as a colorless oil. The crude alcohol was purified via flash column chromatography ( $R_f = 0.40$ , hexanes-ethyl acetate, 2:1) to yield the product as a colorless oil (826 mg, 3.68 mmol, 98%).  $^1\text{H}$  NMR (400 MHz,  $\text{CDCl}_3$ )  $\delta$  6.91-6.83 (AB quartet, 2H,  $\nu_A = 6.90$ ,  $\nu_B = 6.84$ ,  $J_{AB} = 8.0$  Hz), 3.86 (s, 3H), 3.82 (s, 3H), 3.55-3.47 (m, 1H), 3.37-3.28 (m, 2H), 2.31 (bs, 1H), 2.24 (s, 3H), 1.94-1.86 (m, 1H), 1.63-1.55 (m, 1H), 1.27 (d, 3H,  $J = 6.8$  Hz).  $^{13}\text{C}$  NMR (100 MHz,  $\text{CDCl}_3$ )  $\delta$  151.3, 150.8, 137.8, 130.0, 126.4, 121.6, 61.1 (2 x C), 60.2, 41.4, 28.1, 21.9, 15.8.  $[\alpha]_{\text{D}}^{20} +32.1$  (c 3.35,  $\text{CHCl}_3$ ), IR (neat) 3421, 1603, 1574, 1277, 1221, 1069, 1024  $\text{cm}^{-1}$ . HRMS (ESI);  $m/z$  247.1308 ( $[\text{M} + \text{Na}]$ ); exact mass calculated for  $\text{C}_{13}\text{H}_{20}\text{O}_3\text{Na}$ , 247.1310.

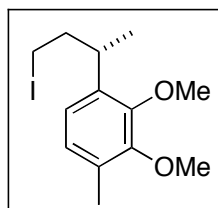

**(S)-1-(4-Iodobutan-2-yl)-2,3-dimethoxy-4-methylbenzene (8):** A 50 mL three-necked flask equipped with magnetic stirring bar, stopper, thermometer, and nitrogen inlet was flame-dried and purged with nitrogen. The flask was charged with alcohol the alcohol from the previous step (0.74 g, 3.26 mmol) dissolved in anhydrous THF (10 mL). Imidazole (0.44 g, 6.52 mmol, 2.0 equiv.) and triphenylphosphine (0.94 g, 3.59 mmol, 1.1 equiv.) were added in sequence and then the vessel was cooled to 0 °C in an ice/water bath. Iodine crystals (0.91 g, 3.59 mmol, 1.1 equiv.) were added in small portions until a red solution persisted. The vessel was allowed to warm to room temperature and then concentrated. The crude residue was purified via flash column chromatography ( $R_f = 0.40$ , hexanes-ethyl acetate, 19:1) to yield the iodide as a colorless oil (1.08 g, 3.23 mmol, 99%).  $^1\text{H}$  NMR (400 MHz,  $\text{CDCl}_3$ )  $\delta$  6.88-6.80 (AB quartet, 2H,  $\nu_A = 6.88$ ,  $\nu_B = 6.80$ ,  $J_{AB} = 8.0$  Hz), 3.86 (s, 3H), 3.82 (s, 3H), 3.25 (sextet, 1H,  $J = 7.2$  Hz), 3.09 (t, 2H,  $J = 8.0$  Hz), 2.24 (s, 3H), 2.19-2.05 (m, 2H), 1.22 (d, 3H,  $J = 7.2$  Hz).  $^{13}\text{C}$  NMR (100 MHz,  $\text{CDCl}_3$ )  $\delta$  151.6, 151.2, 137.2, 130.4, 126.0, 121.7, 61.0, 60.1, 41.7, 33.8, 21.4, 15.9, 5.1.  $[\alpha]_{\text{D}}^{20} +25.1$  (c 1.25,  $\text{CHCl}_3$ ), IR (neat) 1461, 1278, 1066, 813  $\text{cm}^{-1}$ . HRMS (ESI);  $m/z$  357.0331 ( $[\text{M} + \text{Na}]$ ); exact mass calculated for  $\text{C}_{13}\text{H}_{19}\text{O}_2\text{INa}$ , 357.0327.

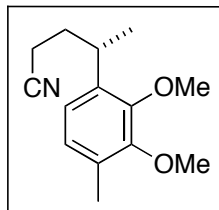

**(S)-4-(2,3-Dimethoxy-4-methylphenyl)pentanenitrile (9):** A 50 mL single-necked flask equipped with a magnetic stirring bar and reflux condenser fitted with a nitrogen inlet was flame-dried and purged with nitrogen. The flask was charged with the iodide from the previous step iodide (833 mg, 2.49 mmol) and NaCN (244 mg, 4.98 mmol, 2.0 equiv.) dissolved in anhydrous dimethylsulfoxide (DMSO, 10 mL). The reaction vessel was heated to 60 °C in an oil bath and allowed to stir for 2 h. The vessel was then cooled to room temperature and the whole was poured into water (30 mL) and extracted with ether (3 x 15 mL). The organic layers were combined and dried over MgSO<sub>4</sub>, and concentrated to give the crude nitrile, which was purified via flash column chromatography ( $R_f = 0.23$ , hexanes-ethyl acetate, 9:1) to yield **9** as a colorless oil (578 mg, 2.48 mmol, >99%). <sup>1</sup>H NMR (400 MHz, CDCl<sub>3</sub>) δ 6.90-6.77 (AB quartet, 2H,  $\nu_A = 6.89$ ,  $\nu_B = 6.78$ ,  $J_{AB} = 7.6$  Hz), 3.86 (s, 3H), 3.82 (s, 3H), 3.24 (sextet, 1H,  $J = 6.8$  Hz), 2.24-2.20 (m, 5H containing 2.24 (s, 3H)), 1.98-1.87 (m, 2H), 1.26 (d, 3H,  $J = 6.8$  Hz). <sup>13</sup>C NMR (100 MHz, CDCl<sub>3</sub>) δ 151.7, 151.2, 136.2, 130.8, 126.1, 121.4, 120.1, 60.8, 60.1, 33.3, 32.0, 21.6, 15.9, 15.7.  $[\alpha]_D^{20} +22.1$  ( $c$  0.70, CHCl<sub>3</sub>), IR (neat) 2245, 1461, 1278, 1024 cm<sup>-1</sup>. HRMS (ESI);  $m/z$  256.1304 ([M + Na]); exact mass calculated for C<sub>14</sub>H<sub>19</sub>NO<sub>2</sub>Na, 256.1313.

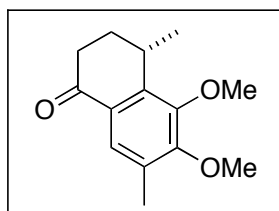

**(S)-5,6-Dimethoxy-4,7-dimethyl-3,4-dihydronaphthalen-1(2H)-one (10):** A 250 mL single-necked flask equipped with a magnetic stirring bar and reflux condenser fitted with a nitrogen inlet was purged with nitrogen. The flask was charged with the nitrile **9** (581 mg, 2.49 mmol) dissolved in methanol (65 mL). Sodium hydroxide (6.47 g, 161.8 mmol, 65 equiv.) and water (30 mL) were added in sequence and the vessel was heated to reflux in an oil bath. The reaction was allowed to reflux overnight (16 h) and then cooled to room temperature. Concentrated HCl (~14 mL) was added until the pH of the reaction mixture was ~1. The whole was poured into water (25 mL) and extracted with ethyl acetate (3 x 15 mL). The organic layers were combined and dried over MgSO<sub>4</sub>, and concentrated to give the crude acid as a pale yellow oil. The crude oil was azeotroped with benzene (3 x 15 mL) and dried overnight with a vacuum pump. *Friedel-Crafts Acylation:* A 50 mL three-necked flask equipped with a magnetic stirring bar, stopper, thermometer, and nitrogen inlet was flame-dried and purged with nitrogen. The flask was charged with the crude acid dissolved in anhydrous DCM (10 mL). The vessel was then cooled to 0 °C in an ice/water bath and a 2.0 M solution of oxalyl chloride in DCM (1.4 mL, 2.74 mmol, 1.1 equiv.) was added dropwise. The vessel was allowed to warm to room temperature and stir for 2 h. The vessel was then re-cooled to 0 °C and AlCl<sub>3</sub> (498 mg, 3.74 mmol, 1.5 equiv.) was added in a single portion. The vessel was allowed to warm to room temperature and stir for 1 h. The vessel was re-cooled to 0 °C and the reaction was quenched by the slow addition of water (5 mL). The whole was poured into water (25 mL) and extracted with ether (3 x 15 mL). The organic layers were combined, dried over MgSO<sub>4</sub>, and concentrated to give the crude ketone which was purified via flash column chromatography ( $R_f = 0.21$ , hexanes-ethyl acetate, 9:1) to yield **10** as a pale yellow oil (563 mg, 2.40 mmol, 97%). <sup>1</sup>H NMR (400 MHz, CDCl<sub>3</sub>) δ 7.64 (s, 1H), 3.89 (s, 3H), 3.88 (s, 3H), 3.41-3.38 (m, 1H), 2.77 (ddd, 1H,  $J = 5.4, 14.8, 18.0$  Hz), 2.52 (ddd, 1H,  $J = 2.4, 4.4, 18.0$  Hz), 2.28-2.19 (m, 4H containing 2.25 (s, 3H)), 2.00-1.94 (m, 1H), 1.32 (d, 3H,  $J = 7.2$  Hz). <sup>13</sup>C NMR (100 MHz, CDCl<sub>3</sub>) δ 197.9, 156.3, 149.8, 142.0, 130.8, 127.8, 125.0, 60.7, 60.0, 33.4, 29.4, 26.9,

19.8, 16.0.  $[\alpha]_D^{20}$  -23.6 (*c* 3.10, CHCl<sub>3</sub>). IR (neat) 1684, 1599, 1411, 1220, 1029 cm<sup>-1</sup>. HRMS (ESI); *m/z* 257.1156 ([M + Na]); exact mass calculated for C<sub>14</sub>H<sub>18</sub>O<sub>3</sub>Na, 257.1154.

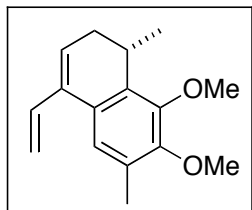

**(S)-7,8-Dimethoxy-1,6-dimethyl-4-vinyl-1,2-dihydronaphthalene (11):**

A 100 mL three-necked flask equipped with a magnetic stirring bar, stopper, addition funnel, and nitrogen inlet was flame-dried and purged with nitrogen. The flask was charged with KHMDS (503 mg, 2.52 mmol, 1.05 equiv.) dissolved in anhydrous THF (10 mL) and a solution of **10** (563 mg, 2.40 mmol) in anhydrous THF (10 mL) was added dropwise via addition funnel. The reaction was allowed to stir at room temperature for 1 h, followed by the addition of *N*-phenylbis(trifluoromethanesulfonimide) (900 mg, 2.52 mmol, 1.05 equiv.). The reaction was allowed to stir at room temperature for 1.5 h, then LiCl (204 mg, 4.81 mmol, 2.0 equiv.), triphenylarsine (147 mg, 0.48 mmol, 0.20 equiv.), Pd<sub>2</sub>dba<sub>3</sub>·CHCl<sub>3</sub> (124 mg, 0.12 mmol, 0.05 equiv.), and tri-*n*-butyl(vinyl)tin (0.74 mL, 2.52 mmol, 1.05 equiv.) were added in sequence and the vessel was allowed to stir at room temperature overnight (16 h). A solution of saturated aqueous KF (20 mL) was added and the reaction was allowed to stir for 2 h. The whole was poured into water (25 mL) and extracted with ether (3 x 15 mL). The organic layers were combined, dried over MgSO<sub>4</sub>, and concentrated to give the crude diene which was purified via flash column chromatography (*R<sub>f</sub>* = 0.36, hexanes-ethyl acetate, 19:1) to yield **11** as a colorless oil (505 mg, 2.07 mmol, 86%). <sup>1</sup>H NMR (400 MHz, CDCl<sub>3</sub>) δ 6.93 (s, 1H), 6.62 (dd, 1H, *J* = 11.2, 16.8 Hz), 5.99-5.97 (m, 1H), 5.50 (dd, 1H, *J* = 1.4, 17.6 Hz), 5.17 (dd, 1H, *J* = 1.4, 10.8 Hz), 3.90 (s, 3H), 3.84 (s, 3H), 3.30 (quintet, 1H, *J* = 7.2 Hz), 2.49 (dd, 1H, *J* = 7.2, 16.8 Hz), 2.25-2.20 (m, 4H containing 2.25 (s, 3H)), 1.10 (d, 3H, *J* = 7.2 Hz). <sup>13</sup>C NMR (100 MHz, CDCl<sub>3</sub>) δ 150.8, 149.8, 136.0, 135.6, 133.9, 129.4, 129.3, 123.1, 122.1, 115.2, 60.9, 60.1, 30.6, 25.6, 20.1, 16.0.  $[\alpha]_D^{20}$  -51.4 (*c* 5.42, CHCl<sub>3</sub>), IR (neat) 3082, 1250, 1040, 910, 820 cm<sup>-1</sup>. HRMS (ESI); *m/z* 267.1356 ([M + Na]); exact mass calculated for C<sub>16</sub>H<sub>20</sub>O<sub>2</sub>Na, 267.1361.

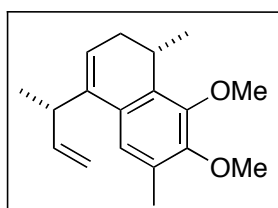

**(S)-4-((S)-But-3-en-2-yl)-7,8-dimethoxy-1,6-dimethyl-1,2-dihydronaphthalene (12a):**

*Precatalyst preparation:* In a glovebox, NaBARF (43.5 mg, 0.049 mmol, 5.0 mol%), (*R*)-2,2'-binaphthoyl-*(S,S)*-di(1-phenylethyl)aminoylphosphine (**L2**, 26.5 mg, 0.049 mmol, 5.0 mol%), and [(allyl)NiBr]<sub>2</sub> (7.9 mg, 0.025 mmol, 2.5 mol%) were weighed into separate glass vials. The phosphoramidite ligand was dissolved in anhydrous DCM (1.0 mL) and transferred to the vial containing [(allyl)NiBr]<sub>2</sub>, followed by 1.0 mL rinsing of the source vial. The resulting yellow solution of phosphoramidite ligand and [(allyl)NiBr]<sub>2</sub> was transferred to the vial containing NaBARF, followed by 1.0 mL rinsing of the source vial. The resulting orange-yellow solution was allowed to stand for 1.5 h. *Asymmetric hydrovinylation:* A 25 mL three-necked flask equipped with a rubber septum, flow-controlled nitrogen inlet, thermometer, and magnetic stirring bar was flame-dried and purged with nitrogen. The catalyst solution prepared above was transferred to the reaction vessel via cannula, followed by 1.0 mL rinsing of the source vial. The system was closed at the flow-controlled stopcock and cooled to 0 °C in an ice/water bath, creating a small vacuum. A strong flow of dry ethylene was introduced via needle through the septum to relieve the vacuum and then the atmosphere of the vessel was evacuated three times via syringe to remove any remaining

nitrogen. The flow of ethylene was adjusted to maintain a pressure of 1 atm by releasing excess gas through an oil bubbler. A solution of the diene (**10**, 200.0 mg, 0.82 mmol) in anhydrous DCM (2.0 mL), followed by 1.0 mL rinsing of the source vial was introduced via syringe as to not increase the reaction temperature above 0 °C. The reaction mixture was allowed to stir at 0 °C for 4 h. The ethylene needle was then removed and the reaction was exposed to air and water (5 mL) was added to quench the reaction. The resulting mixture was poured into water (10 mL) and extracted with ether (3 x 10 mL). The organic layers were combined, dried over MgSO<sub>4</sub>, and concentrated to give the crude hydrovinylation product, which was then eluted through a plug of silica with pentane-ether (19:1) to remove any nickel salts. The eluent was concentrated to yield (**12a** + **12b**) as a colorless oil (223 mg, 0.82 mmol, 92% (8% isomerization based on GC), 92% de). <sup>1</sup>H NMR (400 MHz, CDCl<sub>3</sub>) δ 6.98 (s, 1H), 5.93 (ddd, 1H, *J* = 6.0, 10.4, 16.8 Hz), 5.73 (d, 1H, *J* = 6.4 Hz), 5.12-5.01 (m, 2H), 3.92 (s, 3H), 3.86 (s, 3H), 3.52 (quintet, 1H, *J* = 6.4 Hz), 3.30 (quintet, 1H, *J* = 6.8 Hz), 2.48 (dd, 1H, *J*<sub>1,2</sub> = 5.2, 16.8 Hz), 2.28 (s, 3H), 2.24-2.18 (m, 1H), 1.35 (d, 3H, *J* = 6.8 Hz), 1.10 (d, 3H, *J* = 7.2 Hz). <sup>13</sup>C NMR (100 MHz, CDCl<sub>3</sub>) δ 150.3, 149.6, 143.2, 138.3, 133.8, 129.8, 128.9, 121.4, 120.8, 113.4, 60.9, 60.1, 38.0, 30.4, 25.3, 20.0, 19.2, 16.2. [α]<sub>D</sub><sup>20</sup> -36.0 (*c* 0.86, CHCl<sub>3</sub>). HRMS (ESI); *m/z* 295.1665 ([*M* + Na]); exact mass calculated for C<sub>18</sub>H<sub>24</sub>O<sub>2</sub>Na, 295.1669.

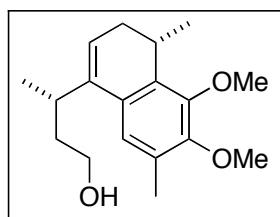

**(S)-3-((S)-5,6-Dimethoxy-4,7-dimethyl-3,4-dihydronaphthalen-1-yl)butan-1-ol (13)**: A 50 mL three-necked flask equipped with magnetic stirring bar, stopper, thermometer, and nitrogen inlet was flame-dried and purged with nitrogen. The flask was charged with the olefin **12a** (231.8 mg, 0.85 mmol) dissolved in anhydrous THF (20 mL). 9-BBN dimer (519.1 mg, 2.13 mmol, 2.5 equiv.) was added in small portions and the reaction mixture was allowed to stir at room temperature for 2 h.

The vessel was cooled to 0 °C in an ice/water bath and 4 M NaOH (2.0 mL) was added dropwise, maintaining the internal temperature of the vessel below 5 °C. A solution of ~30% H<sub>2</sub>O<sub>2</sub> (1.5 mL) was then added dropwise, maintaining the internal temperature of the vessel below 5 °C. The vessel was allowed to warm to room temperature and stir for an additional 0.5 h. The vessel was then diluted with ether (10 mL) and neutralized with 10% H<sub>2</sub>SO<sub>4</sub> until pH ~7 was achieved. The whole was poured into water (15 mL) and extracted with ether (3 x 10 mL). The organic layers were combined and dried over MgSO<sub>4</sub>, and concentrated to give crude **13**, which was purified via flash column chromatography (*R<sub>f</sub>* = 0.42, hexanes-ethyl acetate, 2:1) to yield the product as a colorless oil (245.3 mg, 0.85 mmol, >99%). <sup>1</sup>H NMR (400 MHz, CDCl<sub>3</sub>) δ 6.94 (s, 1H), 5.69 (d, 1H, *J* = 6.4 Hz), 3.88 (s, 3H), 3.83 (s, 3H), 3.72-3.63 (m, 2H), 3.27 (quintet, 1H, *J* = 6.8 Hz), 2.95 (sextet, 1H, *J* = 6.8 Hz), 2.42 (dd, 1H, *J* = 6.8, 16.8 Hz), 2.25 (s, 3H), 2.17 (dd, 1H, *J* = 6.8, 10.0 Hz), 1.87 (sextet, 1H, *J* = 6.8 Hz), 1.66 (sextet, 1H, *J* = 6.8 Hz), 1.22 (d, 3H, *J* = 6.8 Hz), 1.05 (d, 3H, *J* = 7.2 Hz). <sup>13</sup>C NMR (100 MHz, CDCl<sub>3</sub>) δ 150.3, 149.7, 139.9, 133.7, 130.0, 129.0, 120.5, 119.3, 61.4, 60.8, 60.0, 39.8, 30.3, 25.2, 22.8, 20.4, 19.9, 16.2. [α]<sub>D</sub><sup>20</sup> -30.4 (*c* 0.63, CHCl<sub>3</sub>). HRMS (ESI); *m/z* 313.1780 ([*M* + Na]); exact mass calculated for C<sub>18</sub>H<sub>26</sub>O<sub>3</sub>Na, 313.1780.



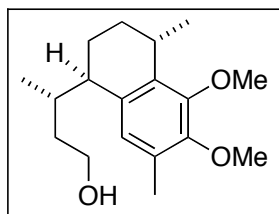

**(S)-3-((1R,4S)-5,6-Dimethoxy-4,7-dimethyl-1,2,3,4-tetrahydronaphthalen-1-yl)butan-1-ol (14a):** An oven dried 50 mL three necked flask was equipped with a magnetic stirring bar, septum, stopper, and an oven dried cold finger with an attached balloon. The flask was charged with the alcohol **13** (187.8 mg, 0.65 mmol) dissolved in a minimal amount of THF (~ 1 mL). The vessel was cooled to -78 °C

in a dry ice/acetone bath and ammonia (passed through a drying tube of barium oxide) was condensed into the vessel (*ca.* 20 mL). Lithium metal (40% dispersion in mineral oil) (168 mg, 9.69 mmol, 15 equiv.) was added, resulting in the formation of a blue solution, which was stirred for an additional 15 min. at -78 °C. The reaction was slowly quenched with methanol (10 mL) resulting in a cloudy white mixture. Water (10 mL) was slowly added to the reaction mixture and the whole was poured into a separatory funnel and extracted with ether (3 x 10 mL). The organic layers were combined and dried over MgSO<sub>4</sub>, and concentrated to give the crude product (**14a** + **14b**), which was purified via flash column chromatography (*R<sub>f</sub>* = 0.24, hexanes-ethyl acetate, 3:1) to get the product as a colorless oil (188.3 mg, 0.64 mmol, >99%). *Note:* ammonia:THF ratio is critical to diastereoselectivity of the reduction. A high ammonia:THF ratio and large excess of lithium gives the best selectivities (>95% *de* determined by GC). <sup>1</sup>H NMR (500 MHz, CDCl<sub>3</sub>) δ 6.74 (s, 1H), 3.87 (s, 3H), 3.80 (s, 3H), 3.78-3.67 (m, 2H), 3.16 (quintet, 1H, *J* = 6.0 Hz), 2.62 (q, 1H, *J* = 6.0 Hz), 2.22 (s, 3H), 2.11 (quintet, 1H, *J* = 6.5 Hz), 1.89-1.19 (m, 2H), 1.76-1.65 (m, 2H), 1.64-1.48 (m, 3H), 1.17 (d, 3H, *J* = 7.0 Hz), 0.76 (d, 3H, *J* = 7.0 Hz). <sup>13</sup>C NMR (125 MHz, CDCl<sub>3</sub>) δ 150.7, 149.2, 135.2, 135.1, 128.9, 125.8, 61.8, 60.6, 60.0, 40.4, 38.8, 35.6, 28.1, 27.5, 22.5, 18.9, 16.5, 16.0. [α]<sub>D</sub><sup>20</sup> +2.51 (*c* 2.11, CHCl<sub>3</sub>). IR (neat) 3360, 1614, 1236, 1014 cm<sup>-1</sup>. HRMS (ESI); *m/z* 315.1910 ([M + Na]); exact mass calculated for C<sub>18</sub>H<sub>28</sub>O<sub>3</sub>Na, 315.1936.

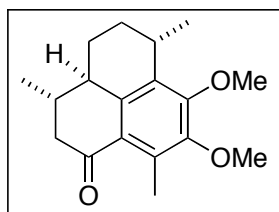

**(3S,3aR,6S)-7,8-Dimethoxy-3,6,9-trimethyl-2,3,3a,4,5,6-hexahydro-1H-phenalen-1-one (16):** A 25 mL three-necked flask equipped with a magnetic stirring bar, septum, thermometer, and nitrogen inlet was flame-dried and purged with nitrogen. The flask was charged with anhydrous DCM (2.0 mL) and dimethyl sulfoxide (0.03 mL) and cooled to -78 °C via dry ice/acetone bath. A 2.0 M solution of oxalyl chloride

(0.13 mL) was added and allowed to stir for 15 min. A solution of alcohol **14** (70.5 mg, 0.21 mmol) in anhydrous DCM (1.0 mL) was added and allowed to stir for 30 min. Triethylamine (0.13 mL) was added and allowed to stir for 15 min. The vessel was allowed to warm to room temperature and the whole was poured into water (10 mL) and extracted with ether (3 x 10 mL). The organic layers were combined and dried over MgSO<sub>4</sub>, and concentrated to give the crude aldehyde, which was used for the next reaction without further purification. Flash column chromatography of the crude aldehyde (**15**) led to the formation of a cyclized product. The crude aldehyde was dissolved in THF (1.0 mL) and *t*-butyl alcohol (1.0 mL) in a 5 dram vial. A solution of 1.0 M tetramethylethylene (1.0 mL) was added to the vial followed by a solution of NaClO<sub>2</sub> (65.4 mg, 0.72 mmol, 3.0 equiv.) and NaH<sub>2</sub>PO<sub>4</sub> (86.7 mg, 0.72 mmol, 3.0 equiv.) dissolved in deionized water (1.0 mL). The reaction mixture was allowed to stir for 1 h then the whole was poured into water (10 mL) and extracted with ether (3 x 10 mL). The organic layers were combined and dried over MgSO<sub>4</sub>, concentrated, and azeotroped with benzene to ensure all water has been removed. A 25 mL three-necked flask equipped with a magnetic stirring bar,

septum, thermometer, and nitrogen inlet was flame-dried and purged with nitrogen. The flask was charged with crude acid dissolved in anhydrous DCM (3.0 mL) and cooled to 0 °C via ice/water bath. A 2.0 M solution of oxalyl chloride in DCM (0.14 mL, 0.29 mmol, 1.2 equiv.) was added and the vessel was allowed to warm to room temperature and stir for 1 h. The vessel was re-cooled to 0 °C and AlCl<sub>3</sub> (48.2 mg, 0.36 mmol, 1.5 equiv.) was added. and subsequently was allowed to warm to room temperature and stir for 30 min. The vessel was re-cooled to 0 °C and the reaction was quenched by the slow addition of water (5 mL). The whole was poured into water and extracted with ether (3 x 10 mL). The organic layers were combined and dried over MgSO<sub>4</sub>, and concentrated to give crude ketone **16** which was purified via flash column chromatography (R<sub>f</sub> = 0.29, hexanes-ethyl acetate, 9:1) to get a mixture of diastereomers (depending on the selectivity of the liquid ammonia reduction) as a colorless oily solid. Recrystallization from methanol afforded colorless needles as a single diastereomer of **16** (28.9 mg, 0.10 mmol, 47 % from the alcohol **14**). <sup>1</sup>H NMR (400 MHz, CDCl<sub>3</sub>) δ 3.92 (s, 3H), 3.75 (s, 3H), 3.23 (sextet, 1H, *J* = 7.2 Hz), 2.62 (dd, 1H, *J* = 3.8, 16.4 Hz), 2.52 (s, 3H), 2.36-2.26 (m, 2H), 2.18-2.12 (m, 2H), 1.80-1.77 (m, 1H), 1.42-1.37 (m, 1H), 1.23 (d, 3H, *J* = 6.8 Hz), 1.13-1.09 (m, 4H containing 1.12 (d, 3H, 6.4 Hz)). <sup>13</sup>C NMR (100 MHz, CDCl<sub>3</sub>) δ 200.2, 155.3, 150.3, 142.6, 133.7, 133.2, 127.7, 60.6, 60.2, 49.3, 43.8, 35.6, 31.3, 28.6, 27.2, 23.7, 19.6, 14.0. mp = 101.5-103.5 °C, [α]<sub>D</sub><sup>20</sup> +59.4 (*c* 1.33, CHCl<sub>3</sub>). IR (neat) 1673, 1448, 1254, 1071 cm<sup>-1</sup>. HRMS (ESI); *m/z* 311.1624 ([M + Na]); exact mass calculated for C<sub>18</sub>H<sub>24</sub>O<sub>3</sub>Na, 311.1623.

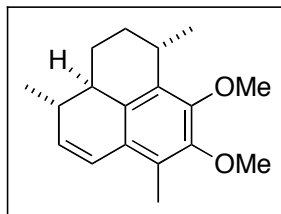

**(1S,3aR,4S)-8,9-Dimethoxy-1,4,7-trimethyl-2,3,3a,4-tetrahydro-1H-phenalene (17):** Ketone **16** (16 mg, 0.055 mmol) was dissolved in ethanol (1.0 mL) in a 5 dram vial. NaBH<sub>4</sub> (6 mg, 0.165 mmol, 3.0 equiv.) was added to the reaction mixture and was allowed to stir at room temperature for 3.5 h. The whole was poured into water and extracted with ether (3 x 10 mL). The organic layers were combined and dried over MgSO<sub>4</sub>, and concentrated to give the crude alcohol which

was used in the subsequent reaction without further purification. The crude alcohol was dissolved in anhydrous DCM (1.0 mL) in an oven-dried 5 dram vial. Camphorsulfonic acid (3.0 mg, 0.011 mmol, 0.20 equiv.) was added and the reaction was allowed to stir at room temperature for 45 min. The whole was poured into water and extracted with ether (3 x 10 mL). The organic layers were dried over MgSO<sub>4</sub>, and concentrated to give crude vinylarene **17** which was purified via flash column chromatography (R<sub>f</sub> = 0.36, hexanes-ethyl acetate, 19:1) to get the pure product as a colorless oil (15 mg, 0.055 mmol, >99%). <sup>1</sup>H NMR (400 MHz, CDCl<sub>3</sub>) δ 6.56 (dd, 1H, *J* = 2.8, 9.6 Hz), 5.75 (dd, 1H, *J* = 2.0, 9.6 Hz), 3.86 (s, 3H), 3.79 (s, 3H), 3.11 (sextet, 1H, *J* = 6.8 Hz), 2.31-2.23 (m, 4H containing 2.23 (s, 3H)), 2.14-2.02 (m, 3H), 1.39-1.26 (m, 5H containing 1.27 (d, 3H, *J* = 6.8 Hz)), 1.19 (d, 3H, *J* = 6.8 Hz). <sup>13</sup>C NMR (100 MHz, CDCl<sub>3</sub>) δ 150.8, 149.7, 134.6, 133.5, 132.3, 128.3, 125.2, 123.9, 60.4, 60.3, 41.2, 34.7, 31.8, 29.4, 26.5, 22.6, 19.8, 11.4. [α]<sub>D</sub><sup>20</sup> +25.9 (*c* 0.92, CHCl<sub>3</sub>). HRMS (ESI); *m/z* 295.1692 ([M + Na]); exact mass calculated for C<sub>18</sub>H<sub>24</sub>O<sub>2</sub>Na, 295.1674.

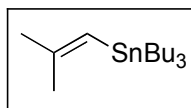

**2-Methyl-1-tri-*n*-butylstannylpropene:** A 3-necked 25 mL round bottomed flask equipped with magnetic stir bar, gas inlet, thermometer adapter and rubber septum was flame-dried, purged with nitrogen, and charged with dry tetrahydrofuran (6.5 mL) which was cooled internally to  $-78\text{ }^{\circ}\text{C}$ . *t*-BuLi (2.3 mL, 3.9 mmol, 1.7 M in pentane) was added *via* syringe, followed by isocrotyl bromide (0.20 mL, 1.95 mmol) over a temperature range of  $-78\text{ }^{\circ}\text{C}$ - $55\text{ }^{\circ}\text{C}$ , then was allowed to recool to  $-78\text{ }^{\circ}\text{C}$ . Tributyltin iodide (0.56 mL, 1.95 mmol) was added neat *via* syringe, keeping the temperature below  $-65\text{ }^{\circ}\text{C}$  and forming a yellow milky color. The cooling bath was removed and the reaction warmed to rt, stirring for 23 h. The mixture was poured into water, washed with saturated KF, and extracted with ether. The organic phases were combined, dried ( $\text{MgSO}_4$ ) and concentrated to an oil of the vinylstannane, which was of sufficient purity to not warrant any further isolation techniques: 679.8 mg, 1.97 mmol, *ca.* 100%.  $^1\text{H NMR}$  (400 MHz,  $\text{CDCl}_3$ )  $\delta$  5.43 (s, 1H), 1.90 (d, 3H,  $J$  1.2 Hz), 1.77 (s, 3H), 1.51-1.47 (m, 6H), 1.35-1.27 (m, 6H), 0.94-0.88 (m, 15H).

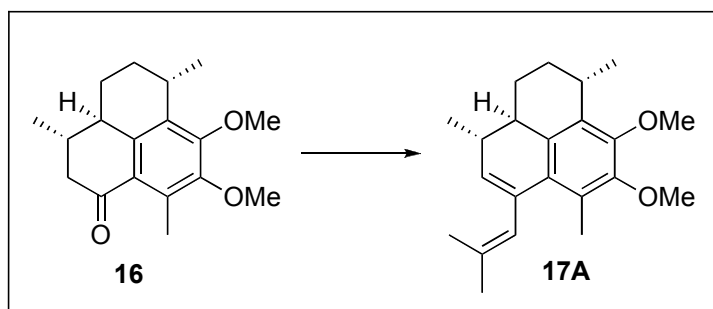

**(1*S*,3*aR*,4*S*)-8,9-Dimethoxy-1,4,7-trimethyl-6-(2-methylprop-1-enyl)-2,3,3*a*,4-tetrahydro-1*H*-phenalene (17A).** A three-necked 25 mL round bottomed flask equipped with magnetic stir bar, gas inlet, rubber septum, and glass stopper was flame-dried, purged with nitrogen, and charged with solid KHMDS (19.3 mg,

0.097 mmol). Dry tetrahydrofuran (1.0 mL) was added *via* syringe, and the clear colorless solution was stirred at  $25\text{ }^{\circ}\text{C}$  while being treated dropwise with a solution of *enantiopure* ketone **16** (19.9 mg, 0.069 mmol) in THF (1.0 mL plus 1.0 mL rinse), forming a red clear solution that was stirred for one hour. Solid *N*-phenylbis(trifluoromethanesulfonimide) (25.9 mg, 0.073 mmol) was added under a stream of nitrogen in a single portion, causing the solution to gradually become a clear pale yellow. The reaction was stirred for one hour. Lithium chloride (5.8 mg, 0.138 mmol), triphenylarsine (2.1 mg, 10 mol%), and  $\text{Pd}_2\text{dba}_3\cdot\text{CHCl}_3$  (3.6 mg, 5 mol%) were added in sequence, followed by a solution of the vinylstannane from the previous experiment (39 mg, 0.113 mmol) in THF (0.5 mL plus 0.5 mL rinse). The reaction was monitored by GC (methyl silicone,  $170\text{ }^{\circ}\text{C}$  for one minute, then  $5\text{ }^{\circ}\text{C}$  per minute to  $250\text{ }^{\circ}\text{C}$ ;  $t_{\text{R}}$  triflate = 16.125,  $t_{\text{R}}$  1,3-diene = 17.906) and judged complete after 6.5 h at rt. The whole was treated with saturated NaF and stirred for 5 minutes, then extracted with ether. The organic extracts were combined, dried ( $\text{MgSO}_4$ ) and concentrated *in vacuo* to a brown oil, which was purified by prep TLC (97.5:2.5 petroleum ether:diethyl ether) to afford clean 1,3-diene (**17A**, 16.6 mg, 0.051 mmol, 74% from ketone **16**).  $R_f$  0.31 (2.5:97.5 ether:petroleum ether).  $^1\text{H NMR}$  (500 MHz,  $\text{CDCl}_3$ )  $\delta$  5.85 (s, 1H), 5.63 (s, 1H), 3.86 (s, 3H), 3.77 (s, 3H), 3.09-3.05 (m, 1H), 2.19 (s, 3H), 2.14-2.04 (m, 3H), 1.91-1.87 (m, 1H), 1.81 (s, 3H), 1.71 (s, 3H), 1.32-1.23 (m, 1H), 1.28 (d, 3H,  $J$  7 Hz), 1.17-1.09 (m, 1H), 1.14 (d, 3H,  $J$  7 Hz).  $^{13}\text{C}$  (125 MHz,  $\text{CDCl}_3$ )  $\delta$  150.59, 149.88, 135.83, 135.43, 135.11, 132.62, 131.89, 131.37, 127.43, 126.68, 60.03, 59.82, 43.06, 34.32, 32.17, 29.68, 26.33, 26.01, 23.20, 19.53, 18.80, 14.06.  $[\alpha]_{\text{D}}$  (*c* 1.107, + 222.8,  $\text{CHCl}_3$ ). IR (neat) 1560, 1458, 1260, 1072  $\text{cm}^{-1}$ . UV ( $\text{CHCl}_3$ )  $\lambda_{\text{max}}$  274 nm ( $\epsilon$  1543).

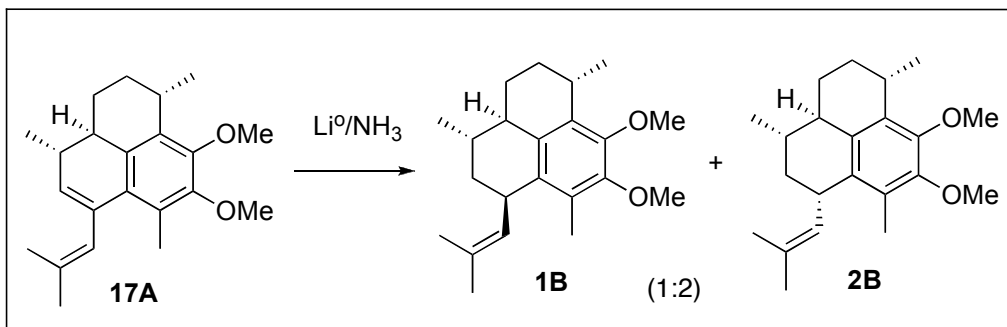

**(1*S*,3*S*,3*aR*,6*S*)-7,8-Dimethoxy-3,6,9-trimethyl-1-(2-methylprop-1-enyl)-2,3,3*a*,4,5,6-hexahydro-1*H*-phenalene (1*B*+2*B*).** An oven-dried three-necked 25 mL round bottomed flask was equipped (under air) with a dry magnetic stir bar, oven-dried cold finger with gas inlet, a glass stopper, and a drying tube packed with barium oxide. A solution of diene **17A** (16.1 mg, 0.049 mmol) in dry THF (1.0 mL plus 1.0 mL rinse) was added *via* pipette, and ammonia (*ca.* 10 mL, passed through a drying tube packed with barium oxide) was condensed into the vessel. Lithium metal (40% dispersion in mineral oil, *ca.* 10-fold excess) was added, forming a blue solution which was stirred for 15 minutes, then was slowly quenched with methanol until a white cloudy mixture formed. The cooling bath was removed and the mixture poured into a large beaker containing dry ether cooled by an ice bath. Excess methanol was added, and the mixture was swirled with addition of a few drops of water (**CAUTION!**). More water was added until all the excess lithium had been killed, leaving behind a clear colorless solution, which was poured into a separatory funnel and extracted from water with ether. The organics were combined, dried ( $\text{MgSO}_4$ ) and concentrated *in vacuo* to a white oily mix, which was filtered through a column of silica gel eluting with isocratic hexane to remove the mineral oil, then with 95:5 hexane:ether to afford a mixture of **1B** and **2B**. Purification by prep TLC (97.5:2.5 petroleum ether:diethyl ether) and analysis by  $^1\text{H}$  and  $^{13}\text{C}$  NMR revealed this to be 1:2 mixture of *R*:*S* epimers at the newly created stereogenic center (12.7 mg, 80%). See attached spectra.  $^1\text{H}$  and  $^{13}\text{C}$  of compound **1B**<sup>3</sup> and close analogs of **2B**<sup>4</sup> have been reported in the literature. The compound **2B** was also confirmed by comparison of the spectra with those a sample prepared according to the scheme shown in Scheme 3.

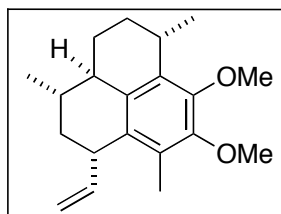

**(1*S*,3*S*,3*aR*,6*S*)-7,8-Dimethoxy-3,6,9-trimethyl-1-vinyl-2,3,3*a*,4,5,6-hexahydro-1*H*-phenalene (18):** *Precatalyst preparation:* In a glovebox, NaBARF (1.3 mg, 0.002 mmol, 2.0 mol%), (*R*)-2,2'-binaphthoyl-(*S,S*)-di(1-phenylethyl)aminoylphosphine (0.8 mg, 0.002 mmol, 2.0 mol%), and [(allyl)NiBr]<sub>2</sub> (0.3 mg, 0.001 mmol, 1.0 mol%) were weighed into separate glass vials. The phosphoramidite ligand was dissolved in anhydrous DCM (0.5 mL) and transferred to the vial containing [(allyl)NiBr]<sub>2</sub>, followed by 0.5 mL rinsing of the source vial. The resulting yellow solution of phosphoramidite ligand and [(allyl)NiBr]<sub>2</sub> was transferred to the vial containing NaBARF, followed by 0.5 mL rinsing of the source vial. The resulting orange-yellow solution was allowed to stand for 1.5 h. *Asymmetric hydrovinylation:* A 25 mL three-necked flask equipped with a rubber septum, flow-controlled nitrogen inlet, thermometer, and magnetic stirring bar was flame-dried and purged with nitrogen. The catalyst solution prepared above was

transferred to the reaction vessel via cannula, followed by 0.5 mL rinsing of the source vial. The system was closed at the flow-controlled stopcock and a strong flow of dry ethylene was introduced via needle through the septum and then the atmosphere of the vessel was evacuated three times via syringe to remove any remaining nitrogen. The flow of ethylene was adjusted to maintain a pressure of 1 atm by releasing excess gas through an oil bubbler. A solution of the olefin (**17**, 20.5 mg, 0.075 mmol) in anhydrous DCM (0.5 mL), followed by 0.5 mL rinsing of the source vial was introduced via syringe. The reaction mixture was allowed to stir at room temperature for 2.5 h. The ethylene needle was then removed and the reaction was exposed to air and water (2 mL) was added to quench the reaction. The resulting mixture was poured into water (10 mL) and extracted with ether (3 x 10 mL). The organic layers were combined, dried over MgSO<sub>4</sub>, and concentrated to give the crude hydrovinylation product, which was then eluted through a plug of silica with pentane-ether (19:1) to remove any nickel salts. The eluent was concentrated to yield (**18**) as a colorless oil (22.5 mg, 0.075 mmol, >99%, >99% de). <sup>1</sup>H NMR (500 MHz, CDCl<sub>3</sub>) δ 5.76 (ddd, 1H, *J* = 7.5, 10.0, 17.5 Hz), 4.95-4.91 (m, 2H), 3.86 (s, 3H), 3.78 (s, 3H), 3.65 (q, 1H, *J* = 8.0 Hz), 3.20 (sextet, 1H, *J* = 7.5 Hz), 2.16 (s, 3H), 2.09-2.02 (m, 4H), 1.38-1.34 (m, 2H), 1.29-1.24 (m, 5H containing 1.26 (d, 3H, *J* = 6.5 Hz)), 1.06 (d, 3H, *J* = 6.5 Hz). <sup>13</sup>C NMR (125 MHz, CDCl<sub>3</sub>) δ 149.6, 144.0 (2 x C), 135.6, 133.4, 132.7, 128.5, 112.9, 60.4, 60.1, 43.2, 42.0, 40.5, 34.4, 31.2, 28.7, 27.0, 24.0, 20.5, 12.8. [α]<sub>D</sub><sup>20</sup> +29.3 (*c* 0.75, CHCl<sub>3</sub>). HRMS (ESI); *m/z* 323.1977 ([M + Na]); exact mass calculated for C<sub>20</sub>H<sub>28</sub>O<sub>2</sub>Na, 323.1987.

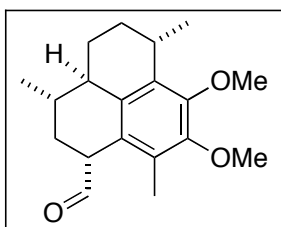

**(1S,3S,3aR,6S)-7,8-Dimethoxy-3,6,9-trimethyl-1-formyl-2,3,3a,4,5,6-hexahydro-1H-phenalene:** The olefin **18** (22.2 mg, 0.074 mmol) was dissolved in anhydrous DCM (2.0 mL) in a 5 dram vial. The vessel was cooled to -78 °C via acetone/dry ice bath and ozone was introduced via bubbling through a glass pipette until a persistent blue color was observed throughout the solution. The flow of ozone was stopped and nitrogen was bubbled through the solution until the blue color was no longer observed. Dimethyl sulfide (0.1 mL, 1.48 mmol, 20.0 equiv.) was added and the reaction mixture was allowed to warm to room temperature. The whole was poured into water (10 mL) and extracted with ether (3 x 10 mL). The organic layers were combined and dried over MgSO<sub>4</sub>, and concentrated to give the crude aldehyde which was eluted through a small plug of neutral alumina with pentane-ether (19:1) to yield the aldehyde (17.1 mg, 0.565 mmol, 76%). *Note:* Elution on a silica gel column resulted in significant loss of product most likely due to what appears to be products from aldehyde enolization. <sup>1</sup>H NMR (400 MHz, CDCl<sub>3</sub>) δ 9.33 (d, 1H, *J* = 3.6 Hz), 3.86 (s, 3H), 3.86-3.76 (m, 5H containing 3.79 (s, 3H)), 3.22 (sextet, 1H, *J* = 7.2 Hz), 2.16-2.04 (m, 6H containing 2.10 (s, 3H)), 2.02-1.94 (m, 2H), 1.60-1.52 (m, 2H), 1.25 (d, 3H, *J* = 6.8 Hz), 1.11 (d, 3H, *J* = 6.8 Hz). <sup>13</sup>C NMR (100 MHz, CDCl<sub>3</sub>) δ 201.3, 150.8, 149.8, 136.3, 134.4, 128.8, 125.3, 60.4, 60.2, 51.4, 43.3, 33.4, 32.0, 31.0, 28.5, 27.0, 24.0, 20.2, 12.8. [α]<sub>D</sub><sup>20</sup> +5.0 (*c* 0.25, CHCl<sub>3</sub>). HRMS (ESI); *m/z* 325.1761 ([M + Na]); exact mass calculated for C<sub>19</sub>H<sub>26</sub>O<sub>3</sub>Na, 325.1774.

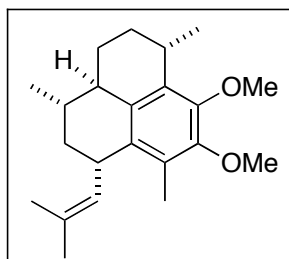

**(1S,3S,3aR,6S)-7,8-Dimethoxy-3,6,9-trimethyl-1-(2-methylprop-1-enyl)-2,3,3a,4,5,6-hexahydro-1H-phenalene (2B):** A 25 mL three-necked flask equipped with a magnetic stirring bar, septum, stopper, and nitrogen inlet was flame-dried and purged with nitrogen. The flask was charged with KHMDS (8.8 mg, 0.044 mmol, 1.1 equiv.) dissolved in anhydrous THF (1.0 mL). Isopropyl triphenylphosphonium bromide

(23.3 mg, 0.060 mmol, 1.5 equiv.) was added and the reaction mixture was allowed to stir at room temperature for 2 h. The reaction mixture was transferred dropwise to a vessel containing the aldehyde from the previous step (12.2 mg, 0.040 mmol) dissolved in anhydrous THF (1.0 mL) at 0 °C via cannula. The reaction mixture was allowed to stir at 0 °C for 30 min., then allowed to warm to room temperature and to stir for an additional 2 h. The reaction mixture was poured into water (10 mL) and extracted with ether (3 x 10 mL). The organic layers were combined and dried over MgSO<sub>4</sub>, and concentrated to give the crude olefin which was purified via flash column chromatography (R<sub>f</sub> = 0.32, hexanes-ethyl acetate, 19:1) to give **2B** (10.0 mg, 0.030 mmol, 75%, dr [**2B**:**1B**] 87:13) as a colorless oil. <sup>1</sup>H NMR (400 MHz, CDCl<sub>3</sub>) δ 4.97 (d, 1H, *J* = 9.2 Hz), 3.84 (s, 3H), 3.77 (s, 3H), 3.69 (q, 1H, *J* = 9.2 Hz), 3.22 (sextet, 1H, *J* = 7.2 Hz), 2.12-2.03 (m, 6H containing 2.07 (s, 3H)), 1.98-1.93 (m, 1H), 1.73 (s, 3H), 1.68 (s, 3H), 1.40-1.31 (m, 2H), 1.25-1.19 (m, 5H containing 1.24 (d, 3H, *J* = 7.2 Hz)), 1.03 (d, 3H, *J* = 6.0 Hz). <sup>13</sup>C NMR (100 MHz, CDCl<sub>3</sub>) δ 149.6, 149.3, 135.5, 134.2, 133.3, 131.1, 128.8, 128.6, 60.4, 60.1, 44.2, 40.3, 37.5, 34.3, 31.5, 28.5, 27.8, 25.6, 24.6, 20.3, 17.8, 12.3. [α]<sub>D</sub><sup>20</sup> +29.0 (*c* 0.55, CHCl<sub>3</sub>). HRMS (ESI); *m/z* 351.2302 ([M + Na]); exact mass calculated for C<sub>22</sub>H<sub>32</sub>O<sub>2</sub>Na, 351.2295. The structure was confirmed by comparison of <sup>1</sup>H and <sup>13</sup>C NMR spectra and chromatographic behavior with those of authentic sample prepared earlier via the Stille route.

### References

1. (a) Smith, C. R.; Mans, D.; RajanBabu, T. V. *Org. Synth.* **2008**, *85*, 238. (b) Arnold, L. A.; Imbos, R.; Mandoli, A.; de Vries, A. H. M.; Naasz, R.; Feringa, B. L. *Tetrahedron*, **2000**, *56*, 2865.
2. (a) Smith, C. R.; Zhang, A.; Mans, D.; RajanBabu, T. V. *Org. Synth.* **2008**, *85*, 248-266. (b) Kobayashi, H.; Sonoda, A.; Iwamoto, H.; Yoshimura, M. *Chem. Lett.* **1981**, *10*, 579. (c) Brookhart, M.; Grant, B.; Volpe, A. F., Jr. *Organometallics*, **1992**, *11*, 3920-3922.
3. Majdalani, A.; Schmalz, H.-G. *Synlett*, **1992**, 1303.
4. S. E. Lazerwith, T. W. Johnson, E. J. Corey, *Org. Lett.* **2000**, *2*, 2389.

7.179  
7.163  
7.020  
6.998  
6.984  
6.962  
6.899  
6.883

5.742  
5.739  
5.707  
5.704  
5.270  
5.267  
5.248  
5.245

3.890  
3.888  
3.850  
3.848

2.270

0.097

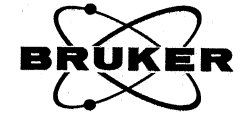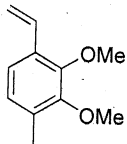

Current Data Parameters  
NAME 8-57  
EXPNO 1  
PROCNO 1

F2 - Acquisition Parameters  
Date\_ 20070708  
Time 13.41  
INSTRUM spect  
PROBHD 5 mm Multinucl  
PULPROG zg30  
TD 65536  
SOLVENT CDCl3  
NS 16  
DS 2  
SWH 10330.578 Hz  
FIDRES 0.157632 Hz  
AQ 3.1719923 sec  
RG 80.6  
DW 48.400 usec  
DE 6.00 usec  
TE 298.2 K  
D1 1.0000000 sec  
MCREST 0.0000000 sec  
MCWRK 0.0150000 sec

==== CHANNEL f1 =====  
NUC1 1H  
P1 14.80 usec  
PL1 -1.00 dB  
SFO1 500.0230878 MHz

F2 - Processing parameters  
SI 32768  
SF 500.0200116 MHz  
WDW EM  
SBB 0  
GB 0.30 Hz  
PC 1.40

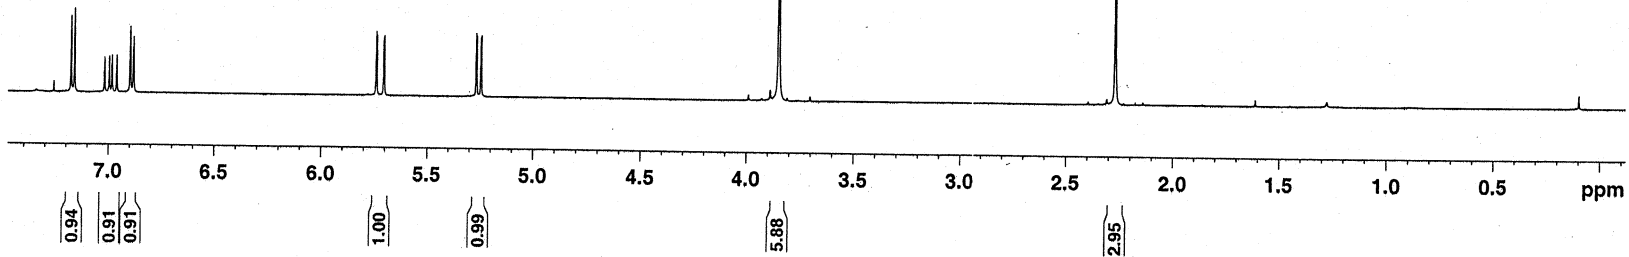

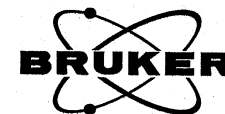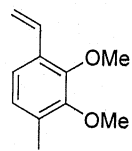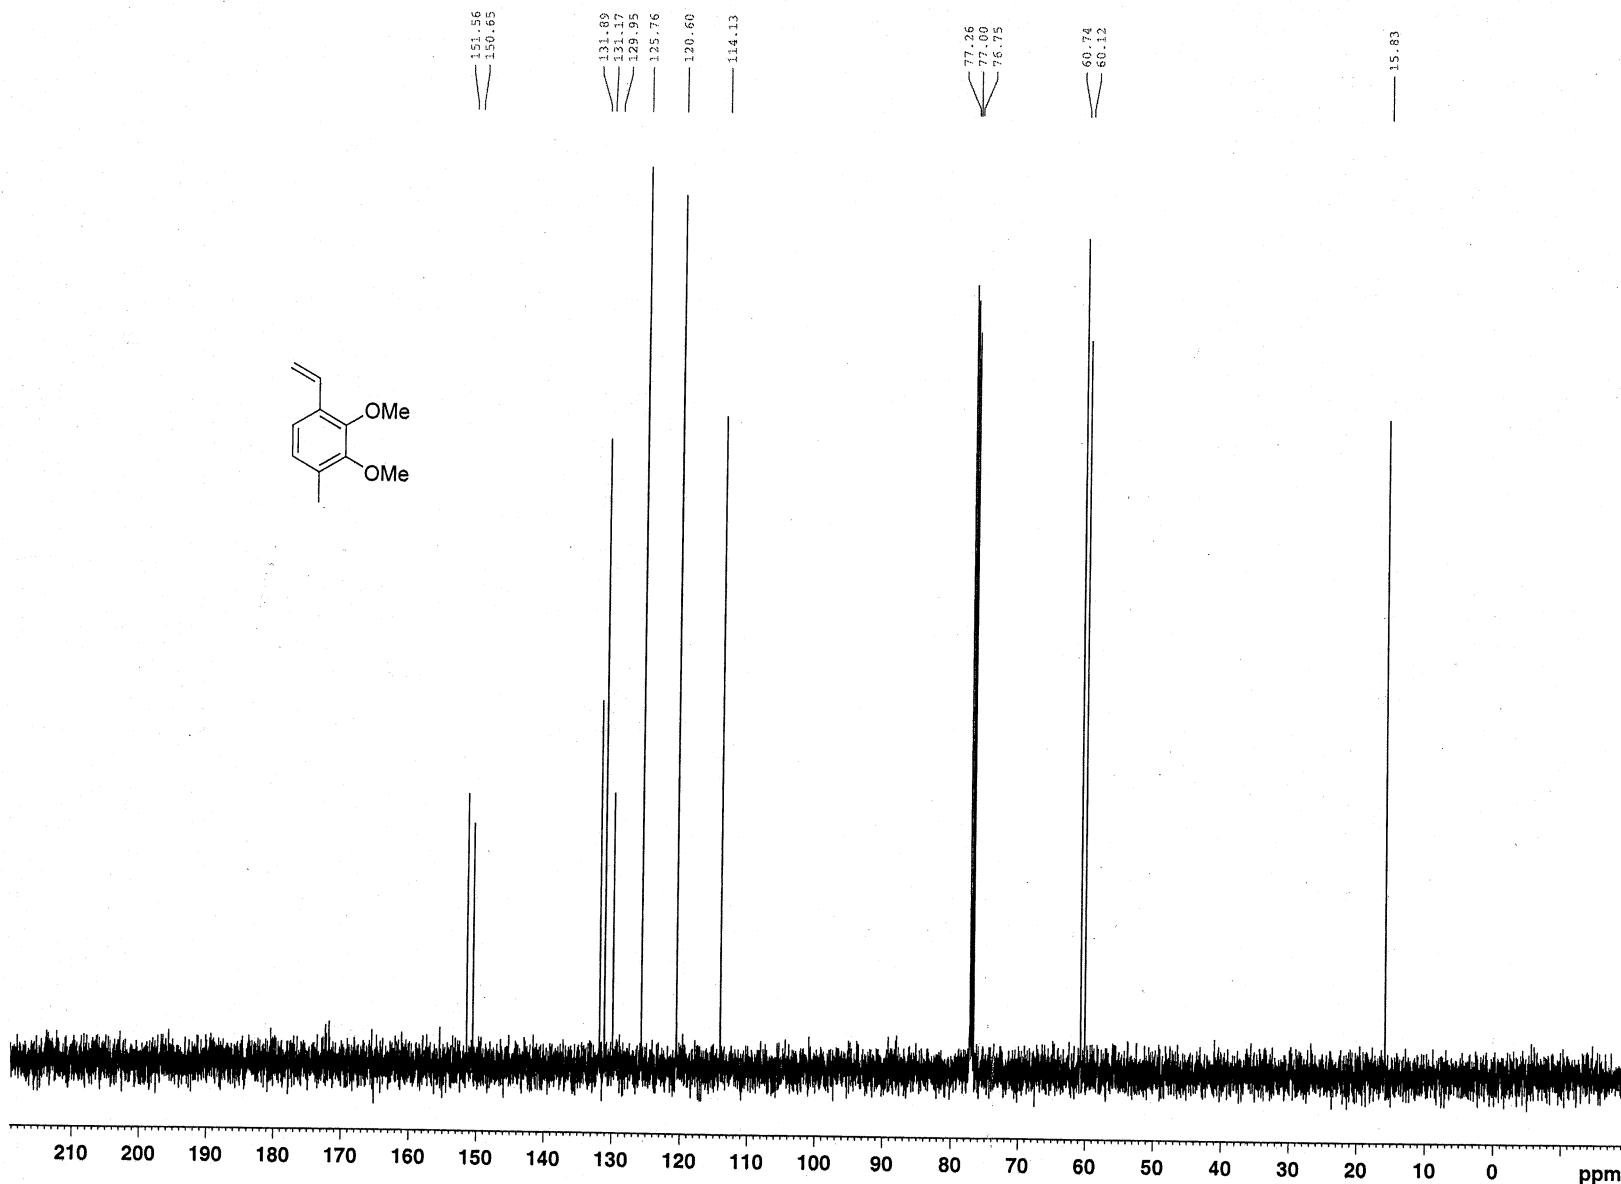

Current Data Parameters  
NAME 8-57  
EXPNO 2  
PROCNO 1

F2 - Acquisition Parameters  
Date\_ 20070708  
Time 13.43  
INSTRUM spect  
PROBHD 5 mm Multinucl  
PULPROG zgpg30  
TD 65536  
SOLVENT cdcl3  
NS 84  
DS 4  
SWH 30030.029 Hz  
FIDRES 0.458222 Hz  
AQ 1.0912244 sec  
RG 5792.6  
DW 16.650 usec  
DE 6.00 usec  
TE 298.2 K  
D1 2.0000000 sec  
d11 0.0300000 sec  
DELTA 1.89999998 sec  
MCREST 0.0000000 sec  
MCWRK 0.01500000 sec

=====  
CHANNEL f1  
NUC1 13C  
P1 13.00 usec  
PL1 3.00 dB  
SFO1 125.7427020 MHz

=====  
CHANNEL f2  
CPDPRG2 waltz16  
NUC2 1H  
PCPD2 100.00 usec  
PL2 -1.00 dB  
PL12 18.80 dB  
PL13 22.50 dB  
SFO2 500.0220001 MHz

F2 - Processing parameters  
SI 32768  
SF 125.7301340 MHz  
WDW EM  
SSB 0  
LB 1.00 Hz  
GB 0  
PC 1.00



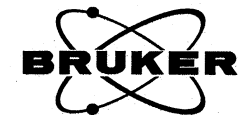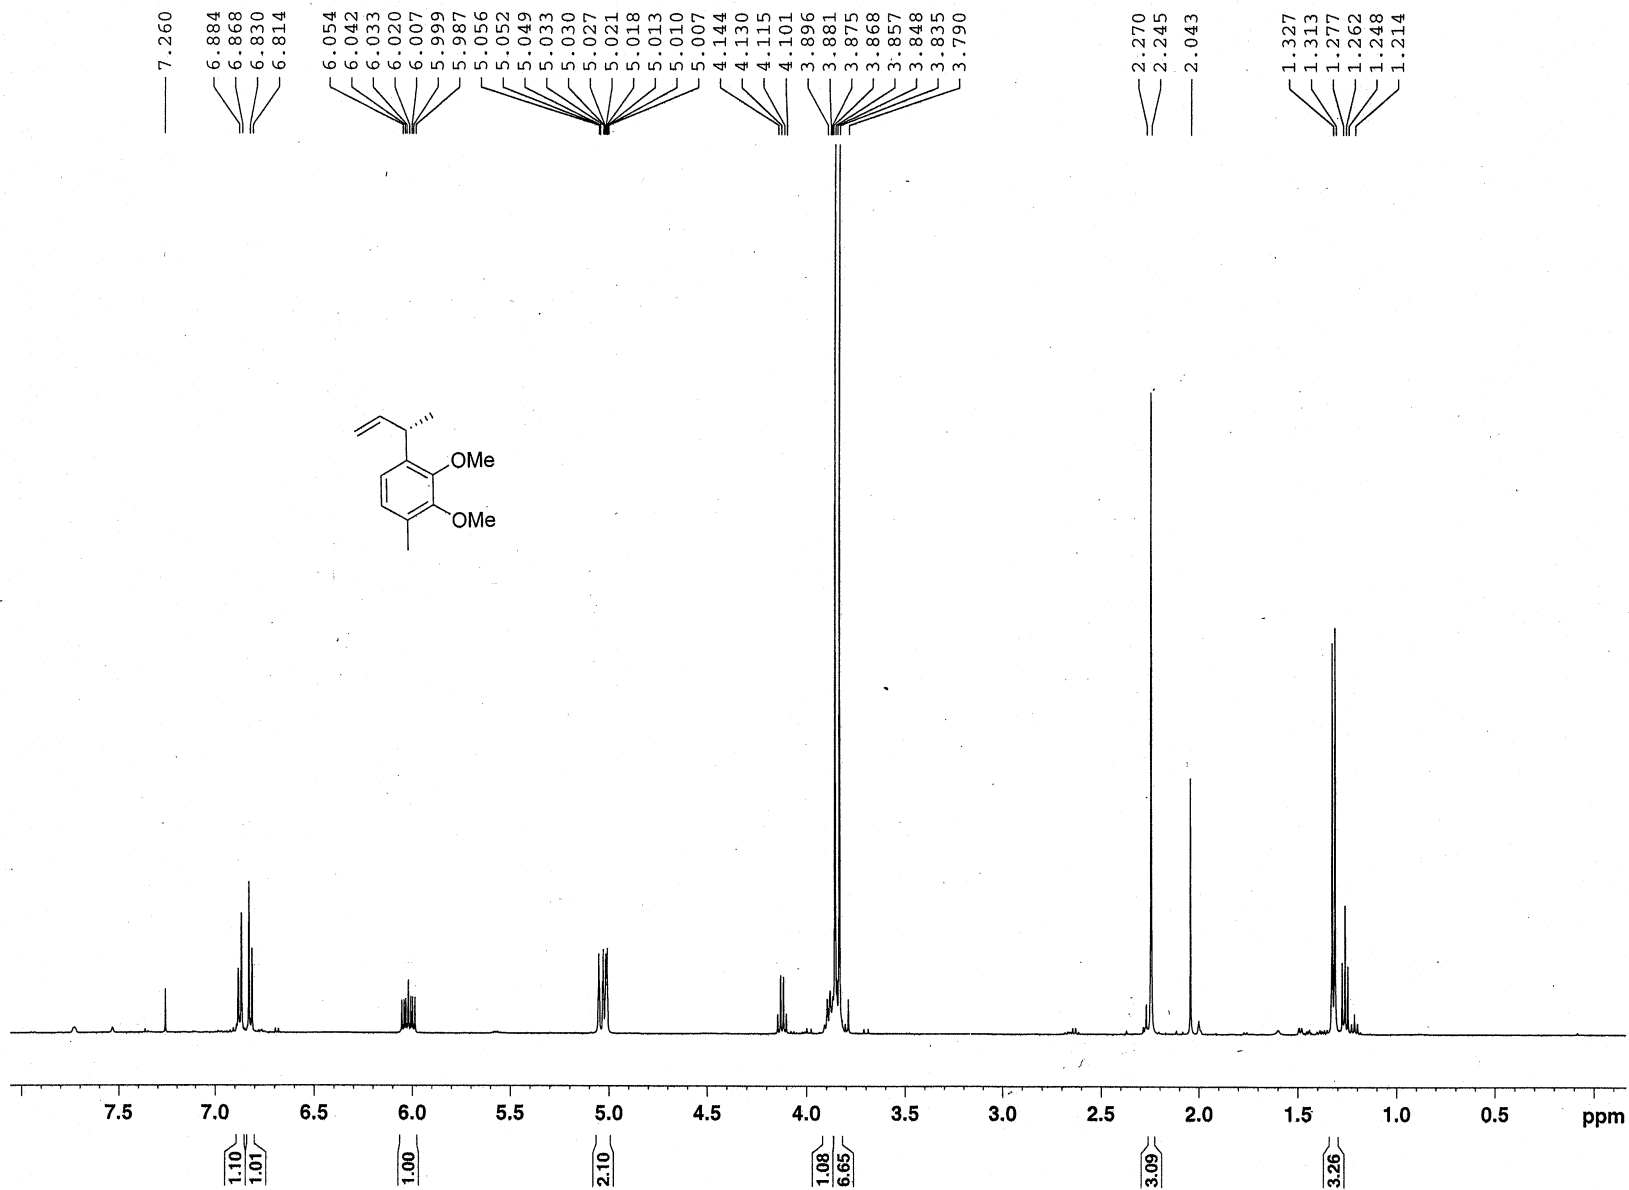

Current Data Parameters  
NAME 6-283  
EXFNO 1  
PROCNO 1

F2 - Acquisition Parameters  
Date\_ 20070109  
Time 14.42  
INSTRUM spect  
PROBHD 5 mm Multinucl  
PULPROG zg30  
TD 65536  
SOLVENT CDCl3  
NS 16  
DS 2  
SWH 10330.578 Hz  
FIDRES 0.157632 Hz  
AQ 3.1719923 sec  
RG 128  
DW 48.400 usec  
DE 6.00 usec  
TE 300.2 K  
D1 1.00000000 sec  
MCREST 0.00000000 sec  
MCWRK 0.01500000 sec

===== CHANNEL f1 =====  
NUC1 1H  
P1 14.80 usec  
PL1 -1.00 dB  
SFO1 500.0230878 MHz

F2 - Processing parameters  
SI 32768  
SF 500.0200116 MHz  
WDW EM  
SSB 0  
LB 0.30 Hz  
GB 0  
PC 1.00

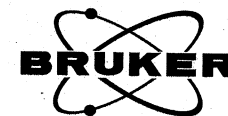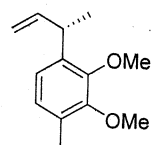

151.34  
150.53  
143.32  
137.28  
129.98  
125.61  
122.20  
112.80  
77.26  
77.00  
76.75  
60.70  
59.89  
35.74  
20.39  
15.64

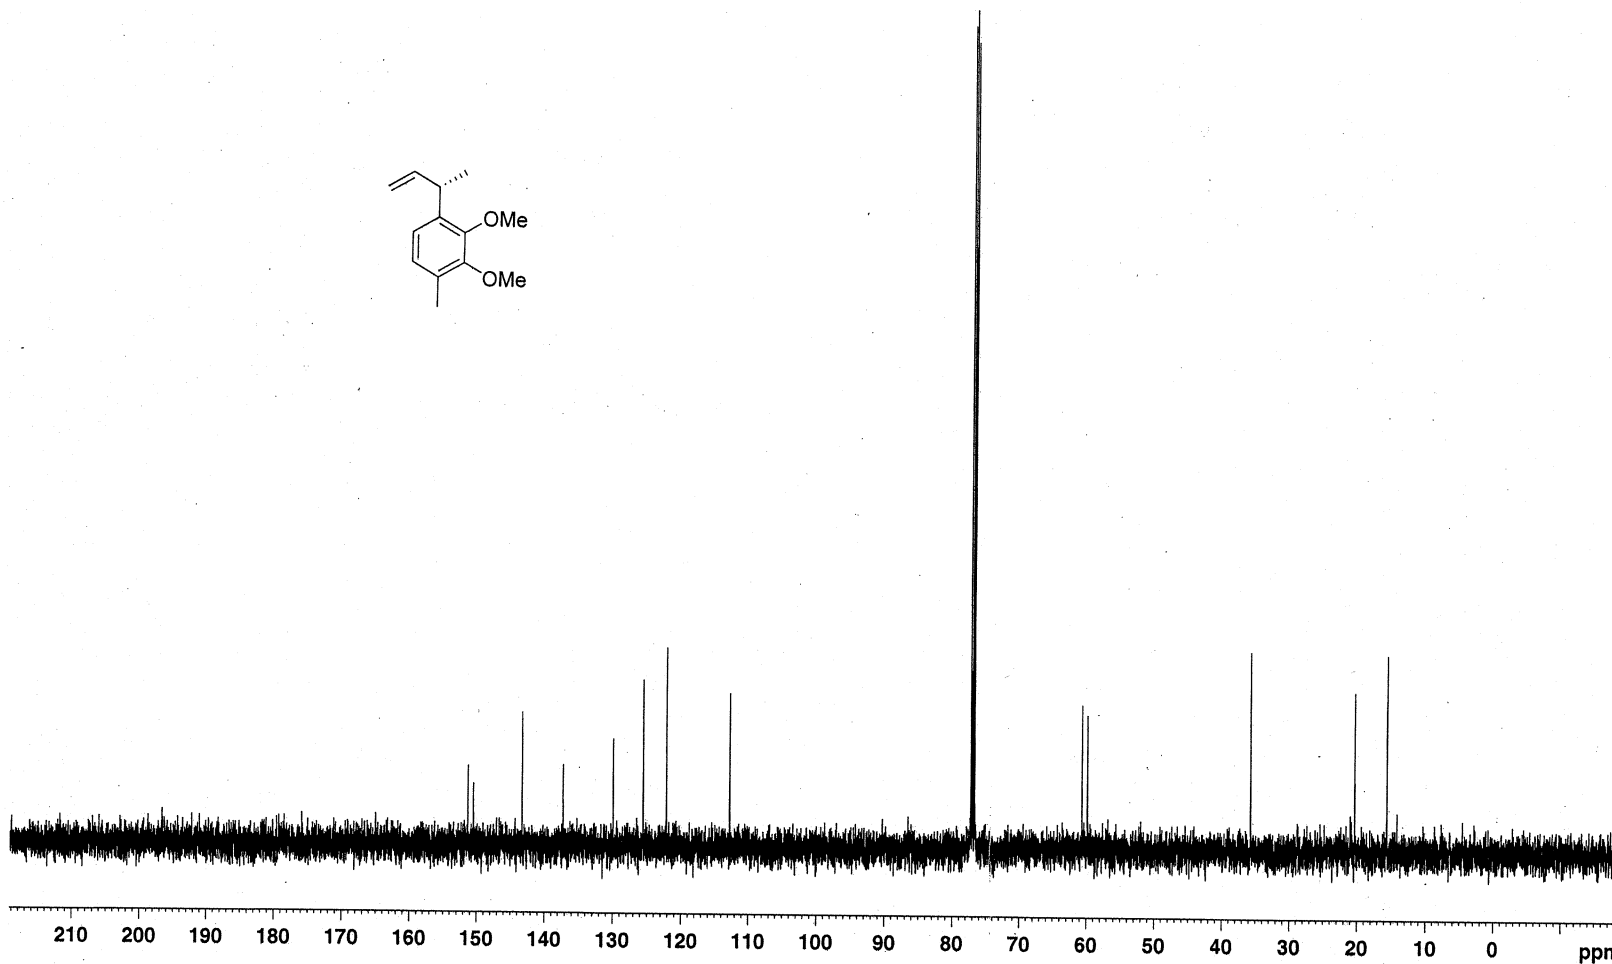

Current Data Parameters  
NAME 6-283  
EXPNO 2  
PROCNO 1

F2 - Acquisition Parameters  
Date\_ 20070109  
Time 14.46  
INSTRUM spect  
PROBHD 5 mm Multinucl  
PULPROG zgpg30  
TD 65536  
SOLVENT CDCl3  
NS 101  
DS 4  
SWH 30030.029 Hz  
FIDRES 0.458222 Hz  
AQ 1.0912244 sec  
RG 3251  
DW 16.650 usec  
DE 6.00 usec  
TE 300.2 K  
D1 2.0000000 sec  
d11 0.0300000 sec  
DELTA 1.89999998 sec  
MCREST 0.0000000 sec  
MCWRK 0.0150000 sec

==== CHANNEL f1 =====  
NUC1 13C  
P1 13.00 usec  
PL1 3.00 dB  
SFO1 125.7427020 MHz

==== CHANNEL f2 =====  
CPDPRG2 waltz16  
NUC2 1H  
PCPD2 100.00 usec  
PL2 -1.00 dB  
PL12 18.80 dB  
PL13 120.00 dB  
SFO2 500.0220001 MHz

F2 - Processing parameters  
SI 32768  
SF 125.7301313 MHz  
WDW EM  
SSB 0  
LB 1.00 Hz  
GB 0  
PC 1.00

\* RUN # 2707 FEB -6, 2006 10:11:23  
 START; not ready

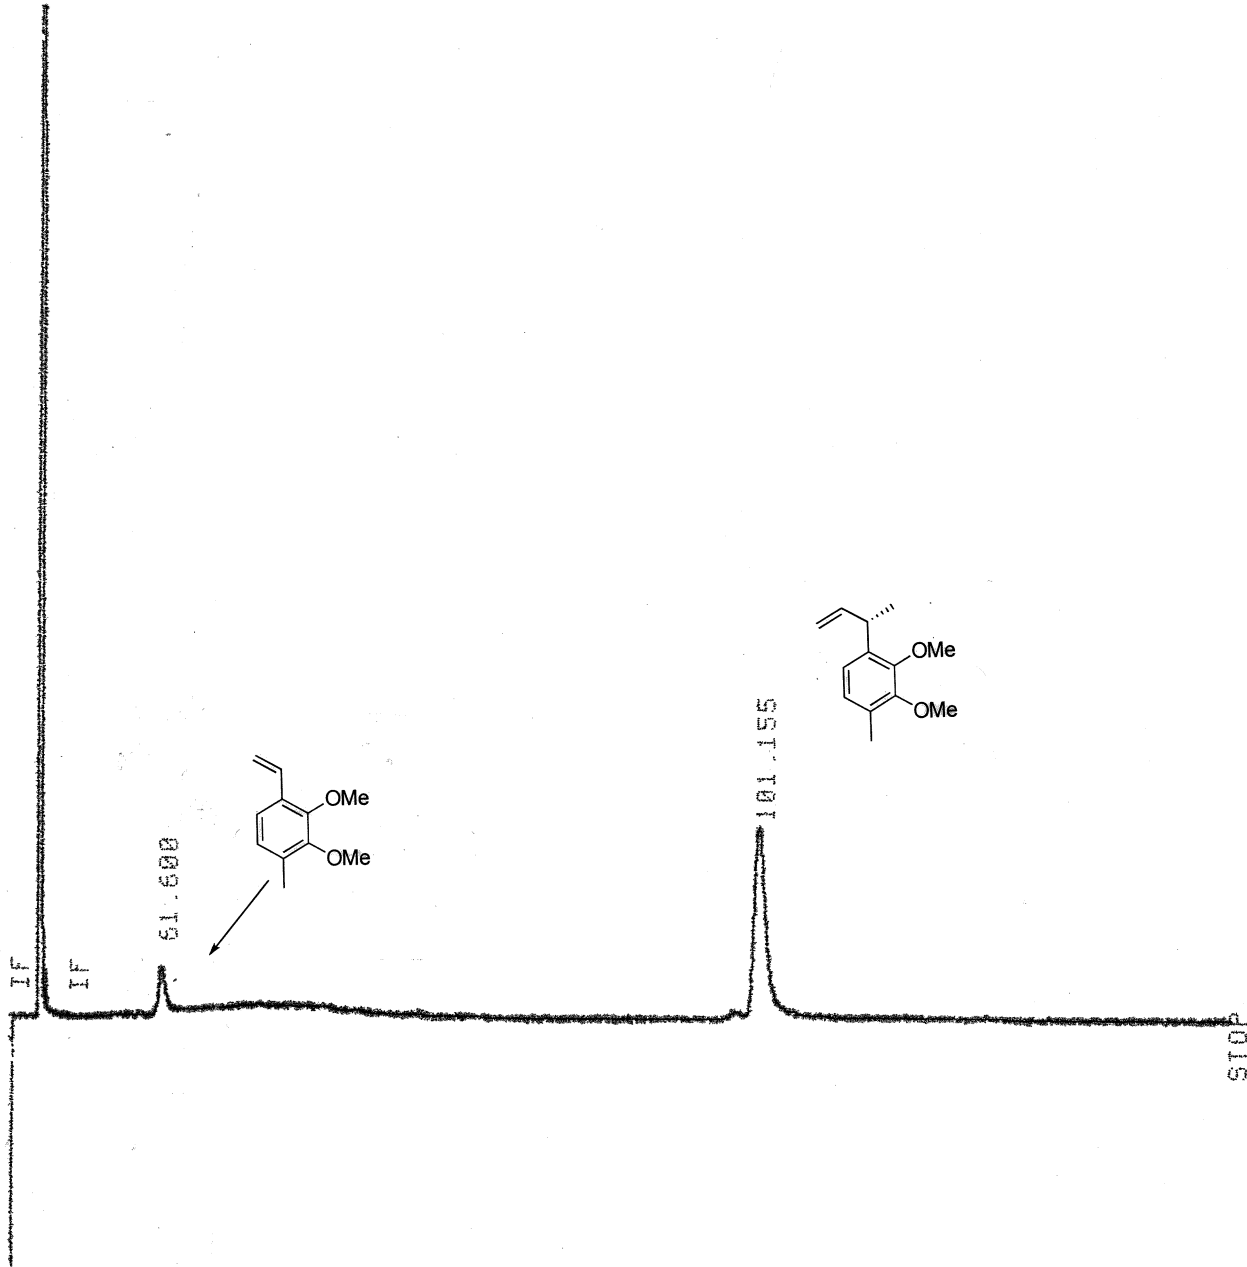

Closing signal file M:SIGNAL .BNC

RUN# 2707 FEB 6, 2006 10:11:23

SIGNAL FILE: M:SIGNAL.BNC

| AREA% | RT      | AREA | TYPE | WIDTH | AREA%    |
|-------|---------|------|------|-------|----------|
| 1905  | 61.600  | 1905 | PV   | .210  | 17.27734 |
| 9121  | 101.155 | 9121 | PV   | .287  | 82.72266 |

TOTAL AREA= 11026  
 MUL FACTOR=1.0000E+00

Injection of Vaccenic + IV-281 85°C isothermal

\* RUN # 2708 FEB 6, 2006 13:06:18

START; not ready  
IF

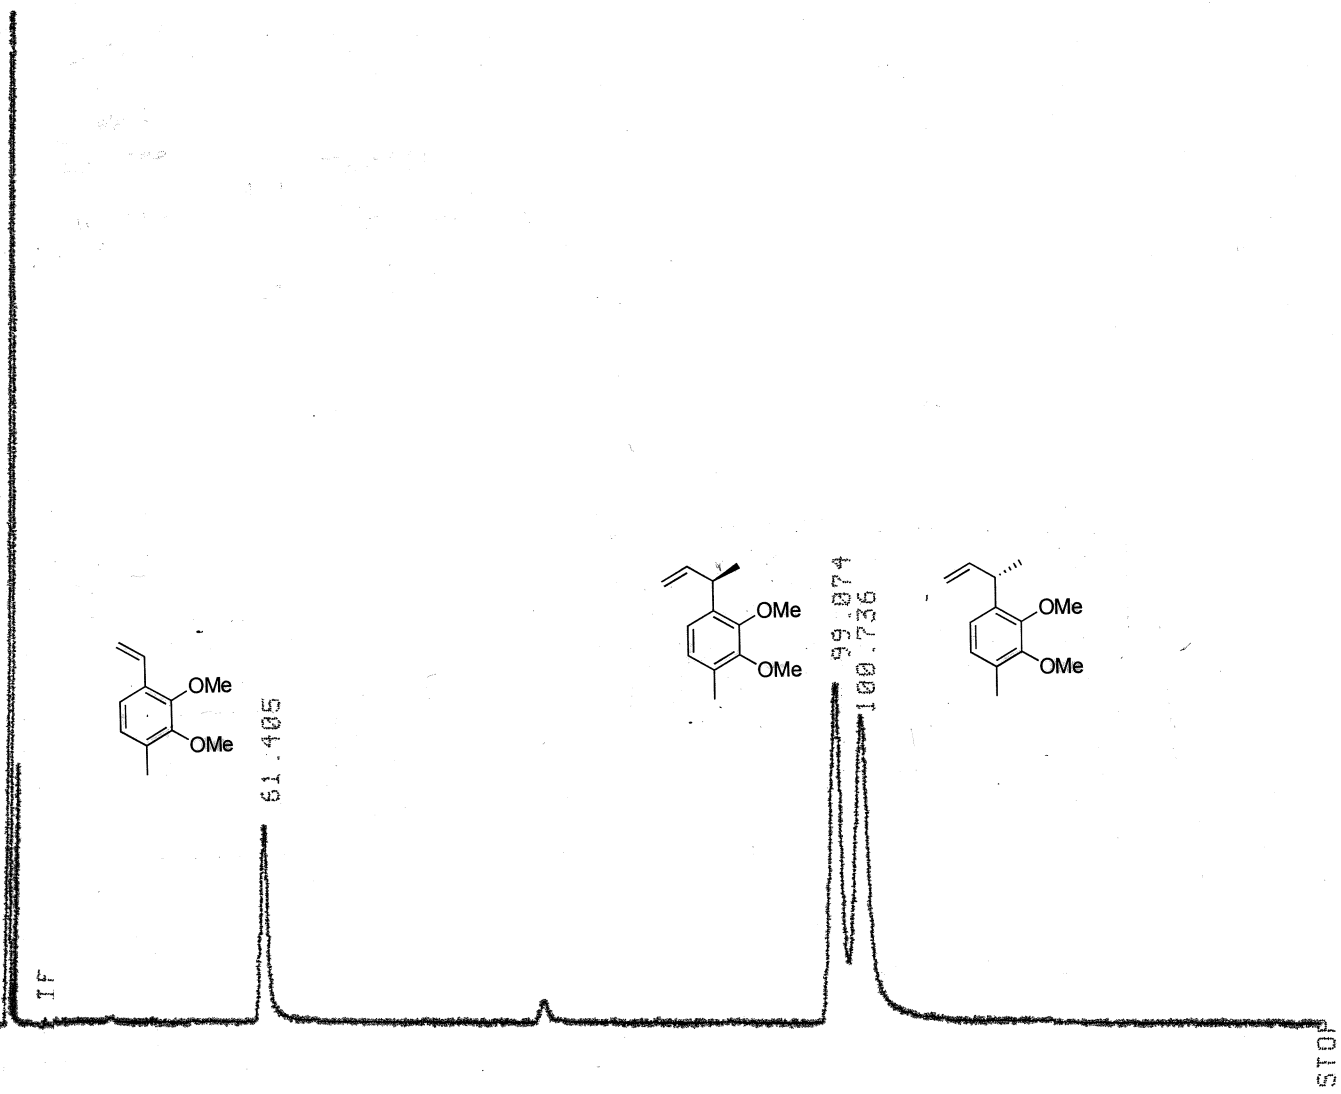

Closing signal file M:SIGNAL .BNC

RUN# 2708 FEB 6, 2006 13:06:18

SIGNAL FILE: M:SIGNAL.BNC

| AREA% | RT      | AREA  | TYPE | WIDTH | AREAX    |
|-------|---------|-------|------|-------|----------|
|       | 28.392  | 878   | PV   | .248  | 2.06476  |
|       | 61.405  | 21734 | BU   | .520  | 51.11117 |
|       | 99.074  | 19803 | PV   | .297  | 46.57010 |
|       | 100.736 | 108   | IPB  | .017  | .25398   |

TOTAL AREA= 42523

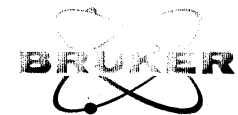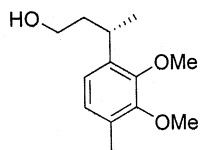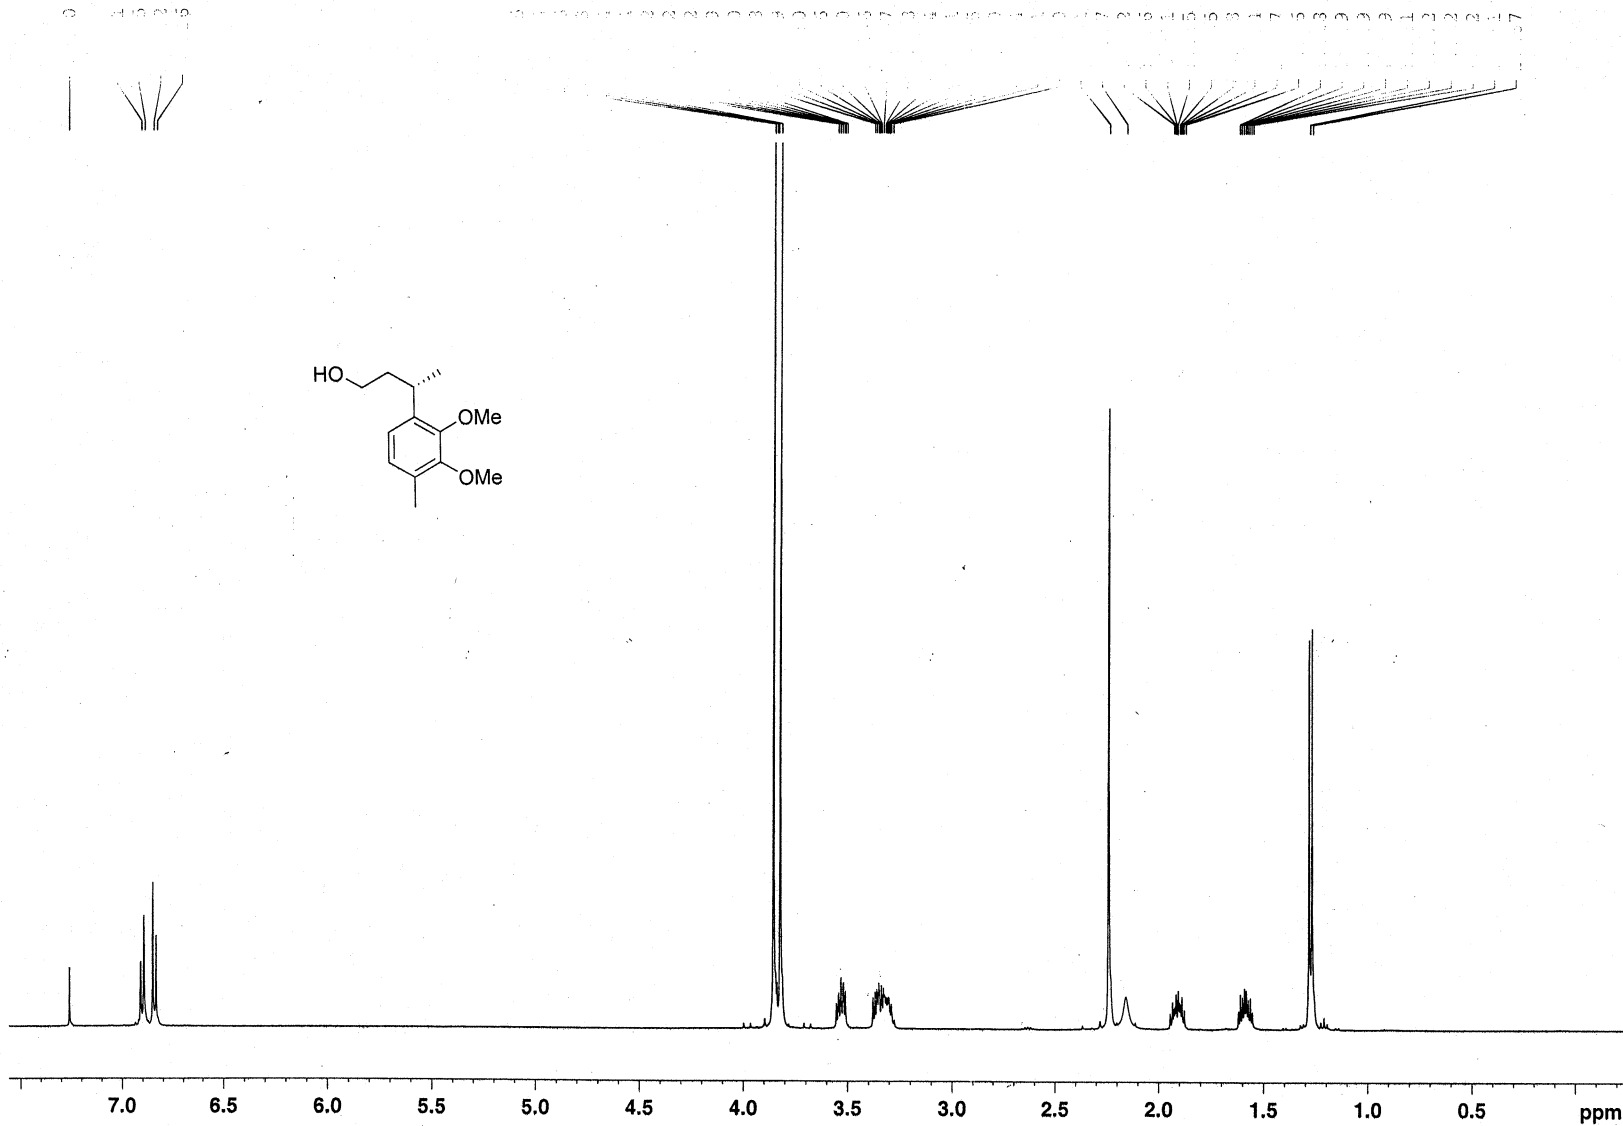

Current Data Parameters  
NAME 5-hydrobor  
EXPNO 1  
PROCNO 1

F2 - Acquisition Parameters  
Date\_ 20060314  
Time 12.36  
INSTRUM spect  
PROBHD 5 mm Multinucl  
PULPROG zg30  
TD 65536  
SOLVENT CDCl3  
NS 16  
DS 2  
SWH 10330.578 Hz  
FIDRES 0.157632 Hz  
AQ 3.1719923 sec  
RG 114  
DW 48.400 usec  
DE 6.00 usec  
TE 300.2 K  
D1 1.00000000 sec  
MCREST 0.00000000 sec  
MCWRK 0.01500000 sec

=====  
CHANNEL f1  
NUC1 1H  
P1 14.80 usec  
PL1 -1.00 dB  
SFO1 500.0230878 MHz

F2 - Processing parameters  
SI 32768  
SF 500.0200119 MHz  
WDW EM  
SSB 0  
LB 0.30 Hz  
GB 0  
PC 1.00

ppm

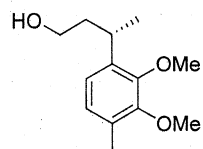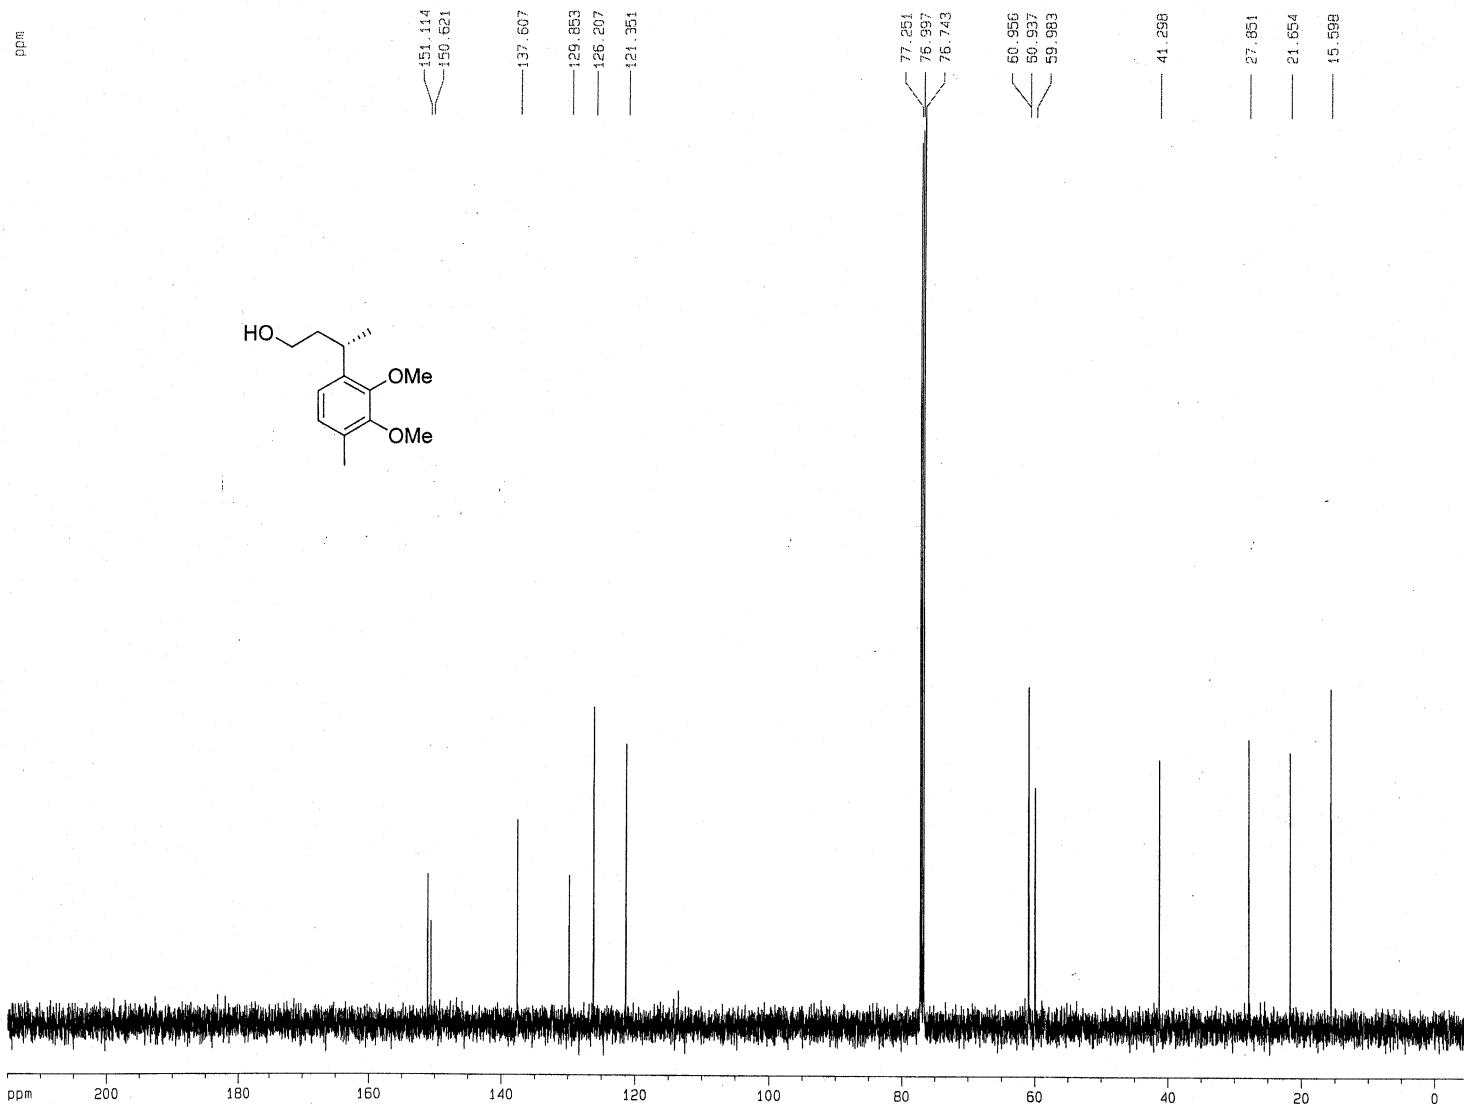

Current Data Parameters  
 NAME 5-hydroboronolol  
 EXPNO 2  
 PROCNO 1

F2 - Acquisition Parameters  
 Date\_ 20060314  
 Time 12.42  
 INSTRUM spect  
 PROBHD 5 mm Multinuc1  
 PULPROG zgpg30  
 TD 65536  
 SOLVENT CDC13  
 NS 77  
 DS 4  
 SWH 30030.029 Hz  
 FIDRES 0.458222 Hz  
 AQ 1.0912244 sec  
 RG 2580.3  
 DW 16.650 usec  
 DE 6.00 usec  
 TE 300.2 K  
 D1 2.00000000 sec  
 d11 0.03000000 sec  
 DELTA 1.89999998 sec  
 MCREST 0.00000000 sec  
 MCWRK 0.01500000 sec

===== CHANNEL f1 =====  
 NUC1 13C  
 P1 13.00 usec  
 PL1 3.00 dB  
 SF01 125.7427020 MHz

===== CHANNEL f2 =====  
 CPDPRG2 waltz16  
 NUC2 1H  
 PCPD2 100.00 usec  
 PL2 -1.00 dB  
 PL12 18.80 dB  
 PL13 120.00 dB  
 SF02 500.0220001 MHz

F2 - Processing parameters  
 SI 32768  
 SF 125.7301322 MHz  
 WDW EM  
 SSB 0  
 LB 1.00 Hz  
 GB 0  
 PC 1.40

1D NMR plot parameters  
 CX 30.00 cm  
 CY 19.00 cm  
 F1P 215.000 ppm  
 F1 27031.98 Hz  
 F2P -5.000 ppm  
 F2 -628.65 Hz  
 PPMCM 7.33333 ppm/cm  
 HZCM 922.02094 Hz/cm

7.260

6.885  
6.869  
6.814  
6.798

3.869  
3.842  
3.827  
3.262  
3.246  
3.232  
3.110  
3.106  
3.095  
3.093  
3.089  
3.079  
3.076  
2.245  
2.190  
2.178  
2.165  
2.162  
2.149  
2.146  
2.117  
2.103  
2.088  
2.074

1.233  
1.219

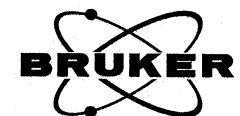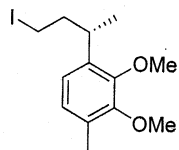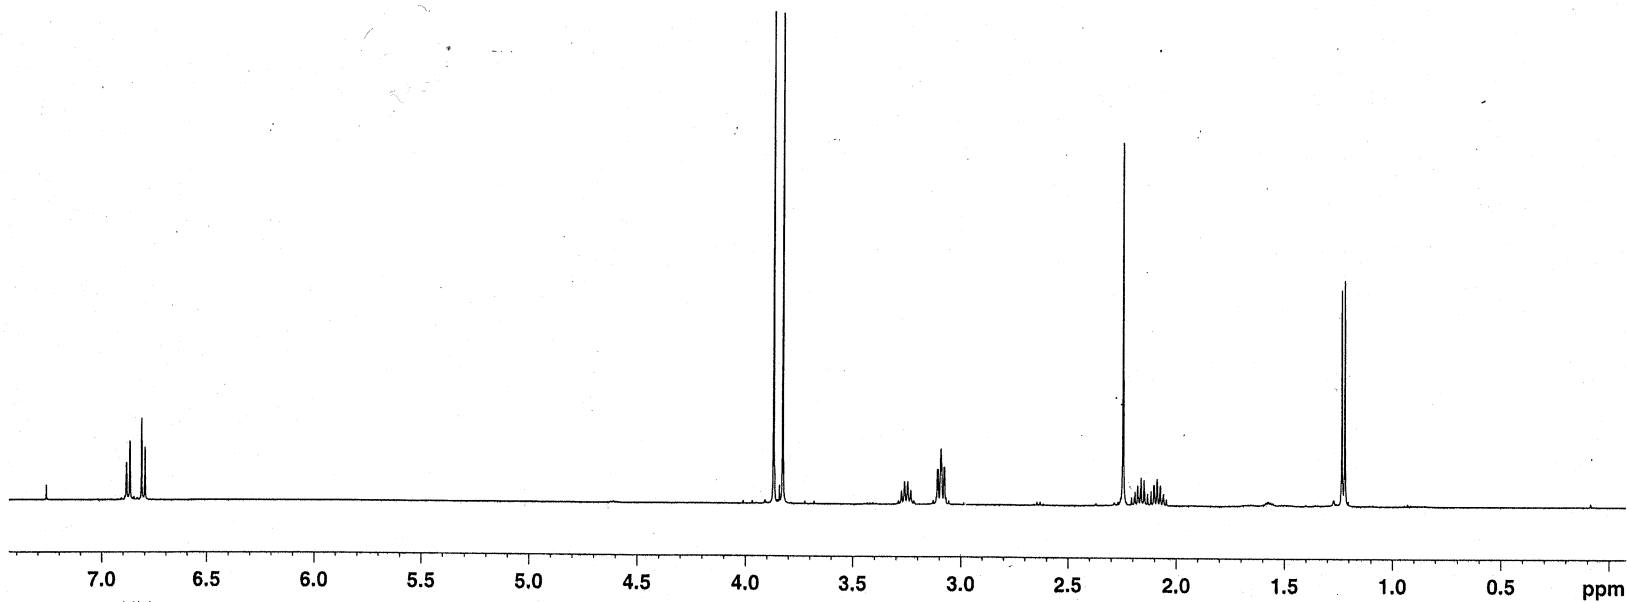

0.94  
0.95

2.96  
2.99

1.00  
1.96

3.08  
1.06  
1.06

3.15

Current Data Parameters  
NAME 5-41  
EXPNO 1  
PROCNO 1

F2 - Acquisition Parameters  
Date\_ 20060318  
Time 15.14  
INSTRUM spect  
PROBHD 5 mm Multinucl  
PULPROG zg30  
TD 65536  
SOLVENT CDCl3  
NS 16  
DS 2  
SWH 10330.578 Hz  
FIDRES 0.157632 Hz  
AQ 3.1719923 sec  
RG 57  
DW 48.400 usec  
DE 6.00 usec  
TE 300.2 K  
D1 1.00000000 sec  
MCREST 0.00000000 sec  
MCWRK 0.01500000 sec

==== CHANNEL f1 =====  
NUC1 1H  
P1 14.80 usec  
PL1 -1.00 dB  
SFO1 500.0230878 MHz

F2 - Processing parameters  
SI 32768  
SF 500.0200113 MHz  
WDW EM  
SSB 0  
LB 0.30 Hz  
GB 0  
PC 1.40

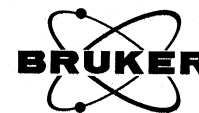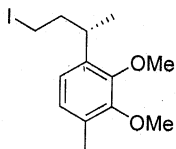

151.26  
150.80  
136.73  
129.88  
125.59  
121.33  
77.32  
77.00  
76.68  
60.55  
59.85  
41.32  
33.48  
21.11  
15.55  
4.66

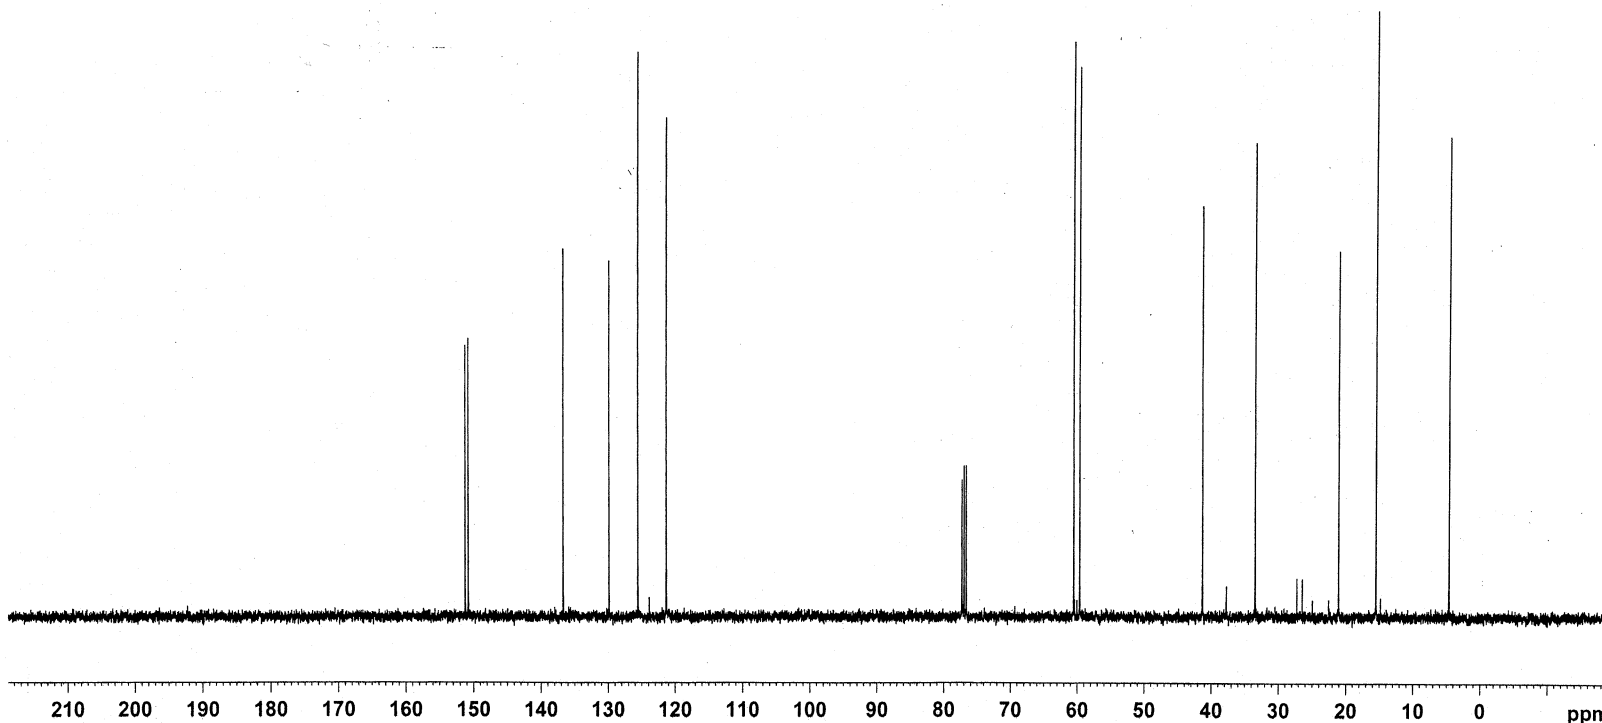

Current Data Parameters  
NAME 5-51  
EXPNO 2  
PROCNO 1

F2 - Acquisition Parameters  
Date\_ 20060325  
Time 16.10  
INSTRUM spect  
PROBHD 5 mm Multinucl  
PULPROG zgpg30  
TD 65536  
SOLVENT CDCl3  
NS 26  
DS 4  
SWH 23980.814 Hz  
FIDRES 0.365918 Hz  
AQ 1.3664756 sec  
RG 5792.6  
DW 20.850 usec  
DE 6.00 usec  
TE 300.2 K  
D1 2.00000000 sec  
d11 0.03000000 sec  
DELTA 1.89999998 sec  
MCREST 0.00000000 sec  
MCWRK 0.01500000 sec

==== CHANNEL f1 =====  
NUC1 13C  
P1 5.90 usec  
PL1 -6.00 dB  
SFO1 100.6228298 MHz

==== CHANNEL f2 =====  
CPDPRG2 waltz16  
NUC2 1H  
PCPD2 80.00 usec  
PL2 -6.00 dB  
PL12 15.80 dB  
PL13 120.00 dB  
SFO2 400.1316005 MHz

F2 - Processing parameters  
SI 32768  
SF 100.6127920 MHz  
WDW EM  
SSB 0  
LB 1.00 Hz  
GB 0  
PC 1.00



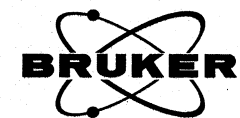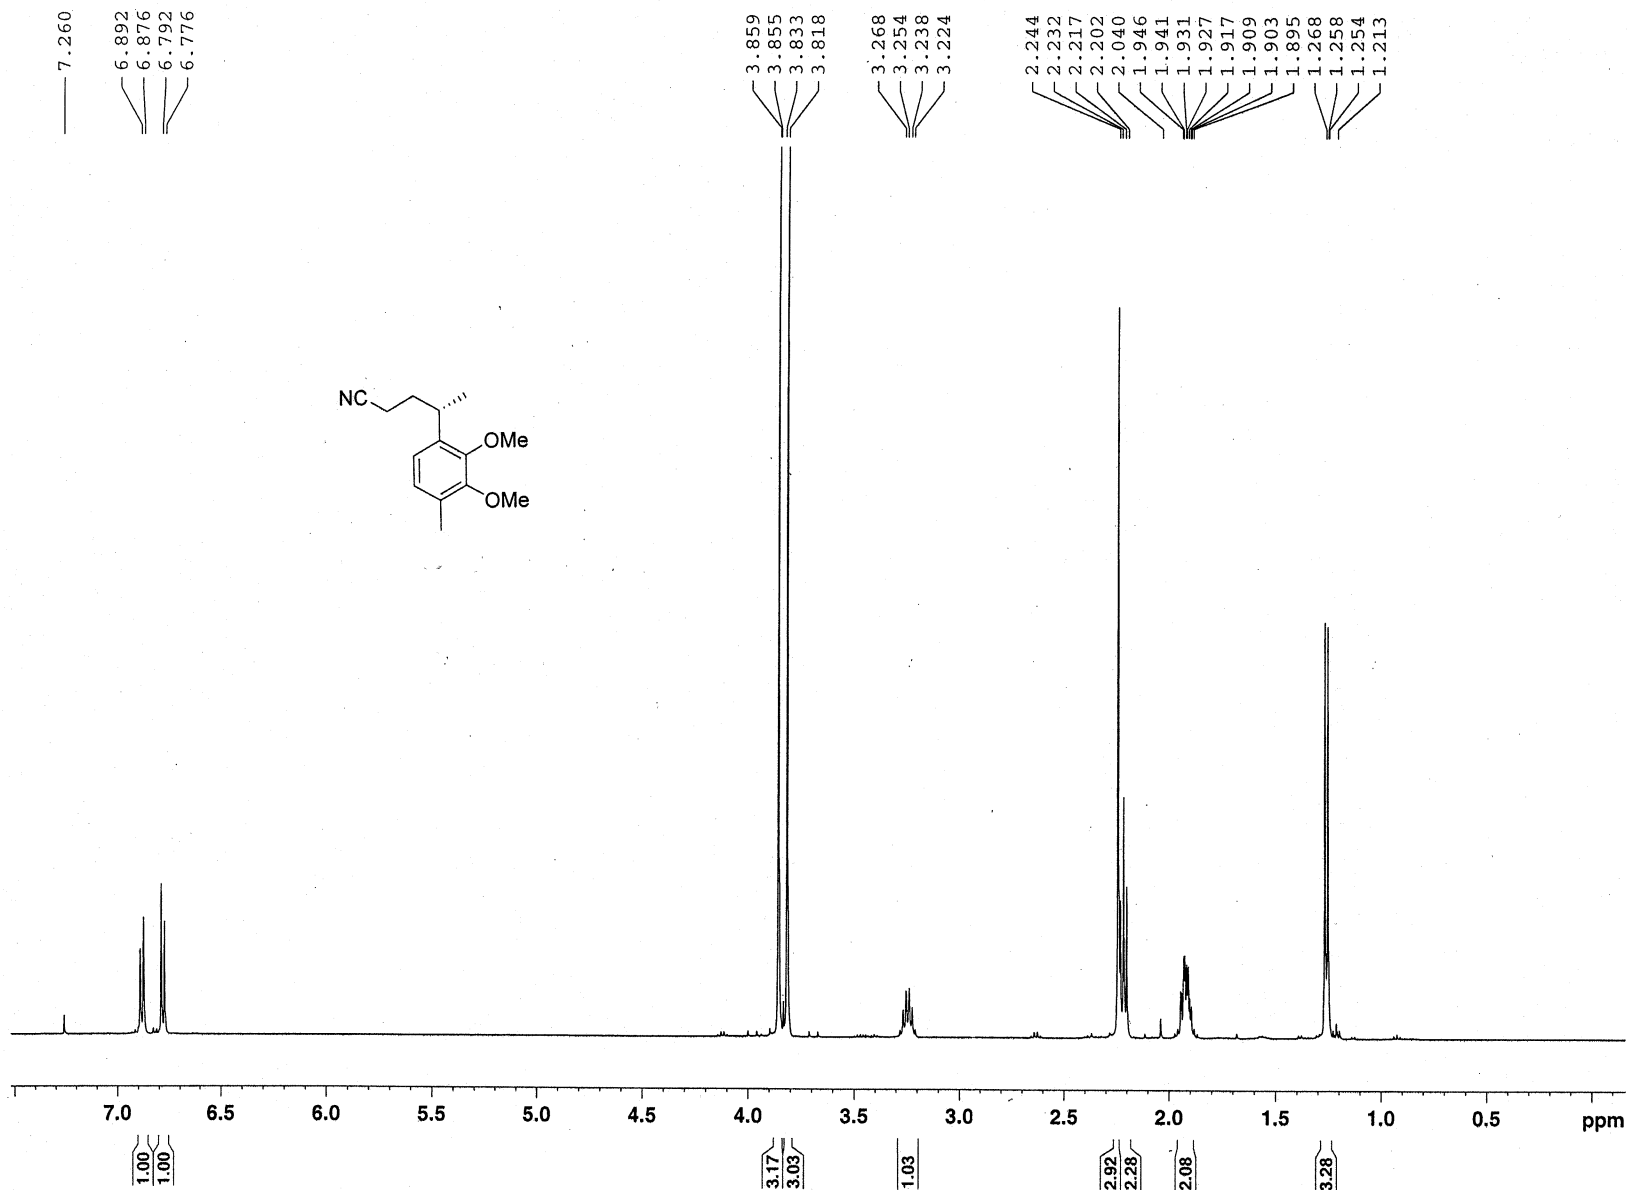

Current Data Parameters  
NAME 5-57  
EXPNO 1  
PROCNO 1

F2 - Acquisition Parameters  
Date\_ 20060327  
Time 14.08  
INSTRUM spect  
PROBHD 5 mm Multinucl  
PULPROG zg30  
TD 65536  
SOLVENT CDCl3  
NS 16  
DS 2  
SWH 10330.578 Hz  
FIDRES 0.157632 Hz  
AQ 3.1719923 sec  
RG 40.3  
DW 48.400 usec  
DE 6.00 usec  
TE 300.2 K  
D1 1.00000000 sec  
MCREST 0.00000000 sec  
MCWRK 0.01500000 sec

===== CHANNEL f1 =====  
NUC1 1H  
P1 14.80 usec  
PL1 -1.00 dB  
SFO1 500.0230878 MHz

F2 - Processing parameters  
SI 32768  
SF 500.0200113 MHz  
WDW EM  
SSB 0  
LB 0.30 Hz  
GB 0  
PC 1.40

ppm

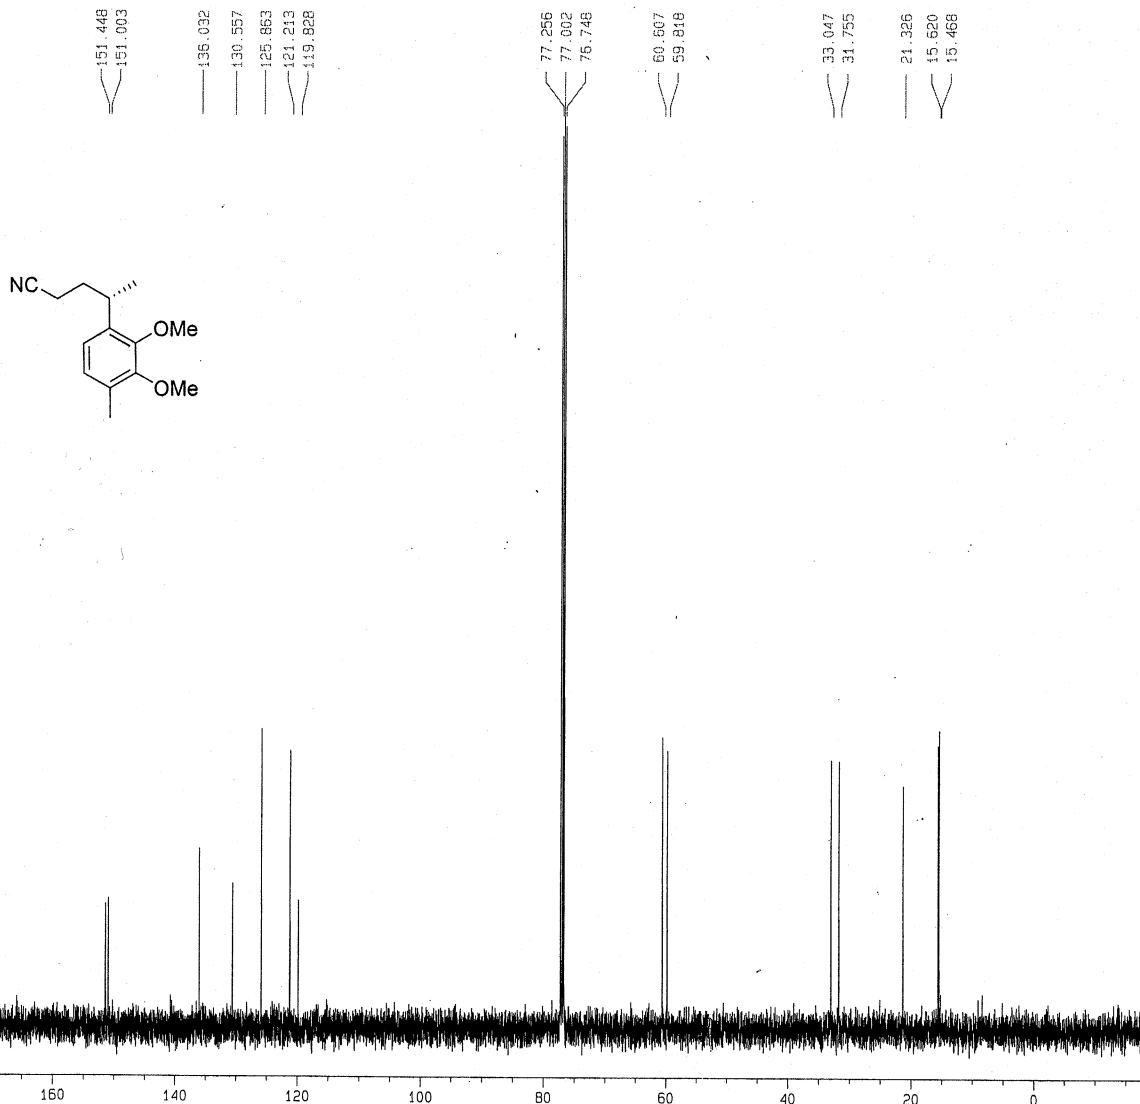

Current Data Parameters  
 NAME 5-43  
 EXPNO 2  
 PROCNO 1

F2 - Acquisition Parameters  
 Date\_ 20060320  
 Time 15.10  
 INSTRUM spect  
 PROBHD 5 mm Multinuc1  
 PULPROG zgpg30  
 TD 65536  
 SOLVENT CDC13  
 NS 51  
 DS 4  
 SWH 30030.029 Hz  
 FIDRES 0.458222 Hz  
 AQ 1.0912244 sec  
 RG 2048  
 DW 16.650 usec  
 DE 6.00 usec  
 TE 300.2 K  
 D1 2.0000000 sec  
 d11 0.0300000 sec  
 DELTA 1.89999998 sec  
 MCREST 0.0000000 sec  
 MCWRK 0.0150000 sec

===== CHANNEL f1 =====  
 NUC1 13C  
 P1 13.00 usec  
 PL1 3.00 dB  
 SFO1 125.7427020 MHz

===== CHANNEL f2 =====  
 CPDPRG2 waltz16  
 NUC2 1H  
 PCPD2 100.00 usec  
 PL2 -1.00 dB  
 PL12 18.80 dB  
 PL13 120.00 dB  
 SF02 500.0220001 MHz

F2 - Processing parameters  
 SI 32768  
 SF 125.7301340 MHz  
 WDW EM  
 SSB 0  
 LB 1.00 Hz  
 GB 0  
 PC 1.40

1D NMR plot parameters  
 CX 30.00 cm  
 CY 19.00 cm  
 F1P 219.383 ppm  
 F1 27583.03 Hz  
 F2P -19.462 ppm  
 F2 -2447.00 Hz  
 PPMCM 7.96150 ppm/cm  
 HZCM 1001.00098 Hz/cm

No title

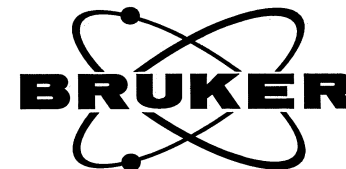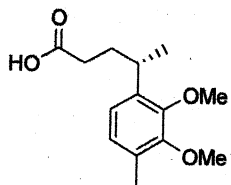

7.260  
6.885  
6.865  
6.826  
6.806  
3.867  
3.829  
3.821  
3.771  
3.200  
3.181  
3.163  
3.146  
3.129  
2.666  
2.342  
2.320  
2.302  
2.284  
2.279  
2.268  
2.262  
2.251  
2.237  
2.190  
1.948  
1.931  
1.914  
1.910  
1.894  
1.880

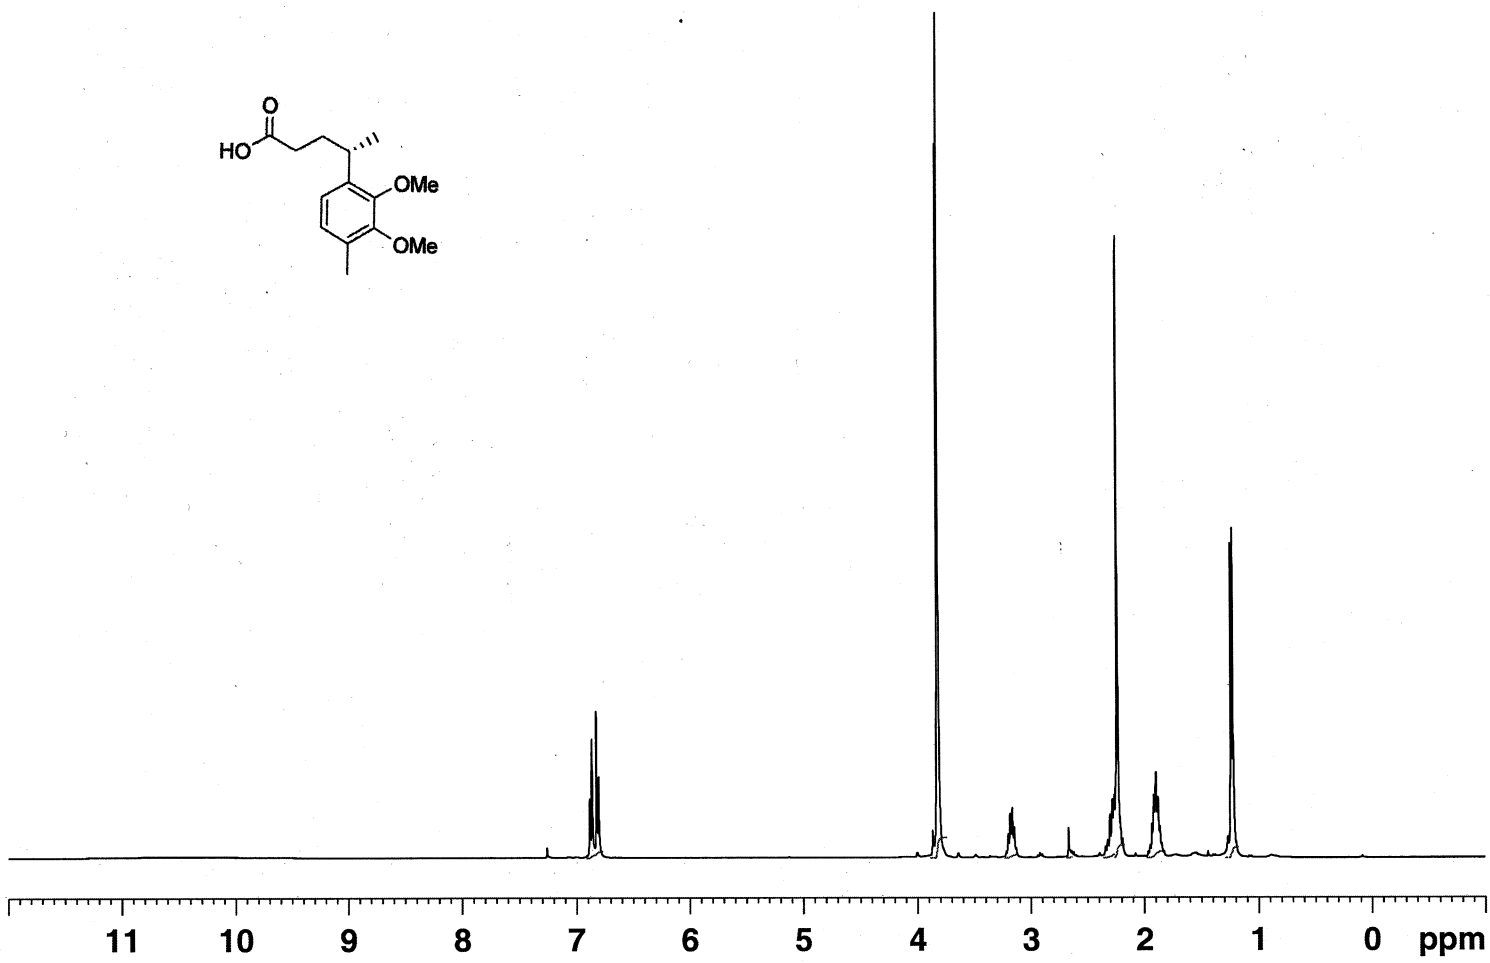

Current Data Parameters  
NAME 6.85  
EXPNO 2  
PROCNO 1

F2 - Acquisition Parameters  
Date\_ 20060912  
Time 10.32  
INSTRUM spect  
PROBHD 5 mm QNP 1H/1  
PULPROG zg30  
TD 65536  
SOLVENT CDCl3  
NS 16  
DS 2  
SWH 8250.825 Hz  
FIDRES 0.125898 Hz  
AQ 3.9715922 sec  
RG 32  
DW 60.600 usec  
DE 6.00 usec  
TE 300.3 K  
D1 1.00000000 sec  
MCREST 0.00000000 sec  
MCWRK 0.01500000 sec

==== CHANNEL f1 =====  
NUC1 1H  
P1 26.00 usec  
PL1 1.00 dB  
SFO1 400.1724712 MHz

F2 - Processing parameters  
SI 32768  
SF 400.1700074 MHz  
WDW EM  
SSB 0  
LB 0.30 Hz  
GB 0  
PC 1.00

2.03  
0.15  
6.06  
1.00  
0.18  
1.16  
3.98  
2.11  
0.14  
3.17

No title

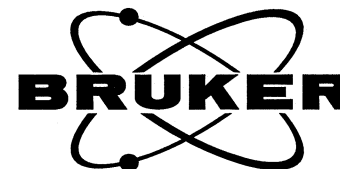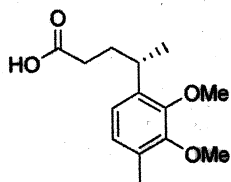

179.98  
 151.29  
 150.86  
 137.54  
 129.92  
 125.77  
 121.34  
 77.32  
 77.00  
 76.69  
 60.59  
 59.85  
 32.40  
 32.28  
 31.51  
 21.74  
 15.61

Current Data Parameters  
 NAME 6-8593  
 EXPNO 1  
 PROCNO 1

F2 - Acquisition Parameters  
 Date\_ 20060912  
 Time 10.21  
 INSTRUM spect  
 PROBHD 5 mm QNP 1H/1  
 PULPROG zgpg30  
 TD 65536  
 SOLVENT CDC13  
 NS 137  
 DS 4  
 SWH 24038.461 Hz  
 FIDRES 0.366798 Hz  
 AQ 1.3632196 sec  
 RG 3649.1  
 DW 20.800 usec  
 DE 6.00 usec  
 TE 300.2 K  
 D1 2.00000000 sec  
 d11 0.03000000 sec  
 DELTA 1.89999998 sec  
 MCREST 0.00000000 sec  
 MCWRK 0.01500000 sec

==== CHANNEL f1 =====  
 NUC1 13C  
 P1 10.50 usec  
 PL1 4.00 dB  
 SFO1 100.632888 MHz

==== CHANNEL f2 =====  
 CPDPRG2 waltz16  
 NUC2 1H  
 PCPD2 80.00 usec  
 PL2 1.00 dB  
 PL12 10.76 dB  
 PL13 120.00 dB  
 SFO2 400.1716007 MHz

F2 - Processing parameters  
 SI 32768  
 SF 100.6228286 MHz  
 WDW EM  
 SSB 0  
 LB 1.00 Hz  
 GB 0  
 PC 1.40

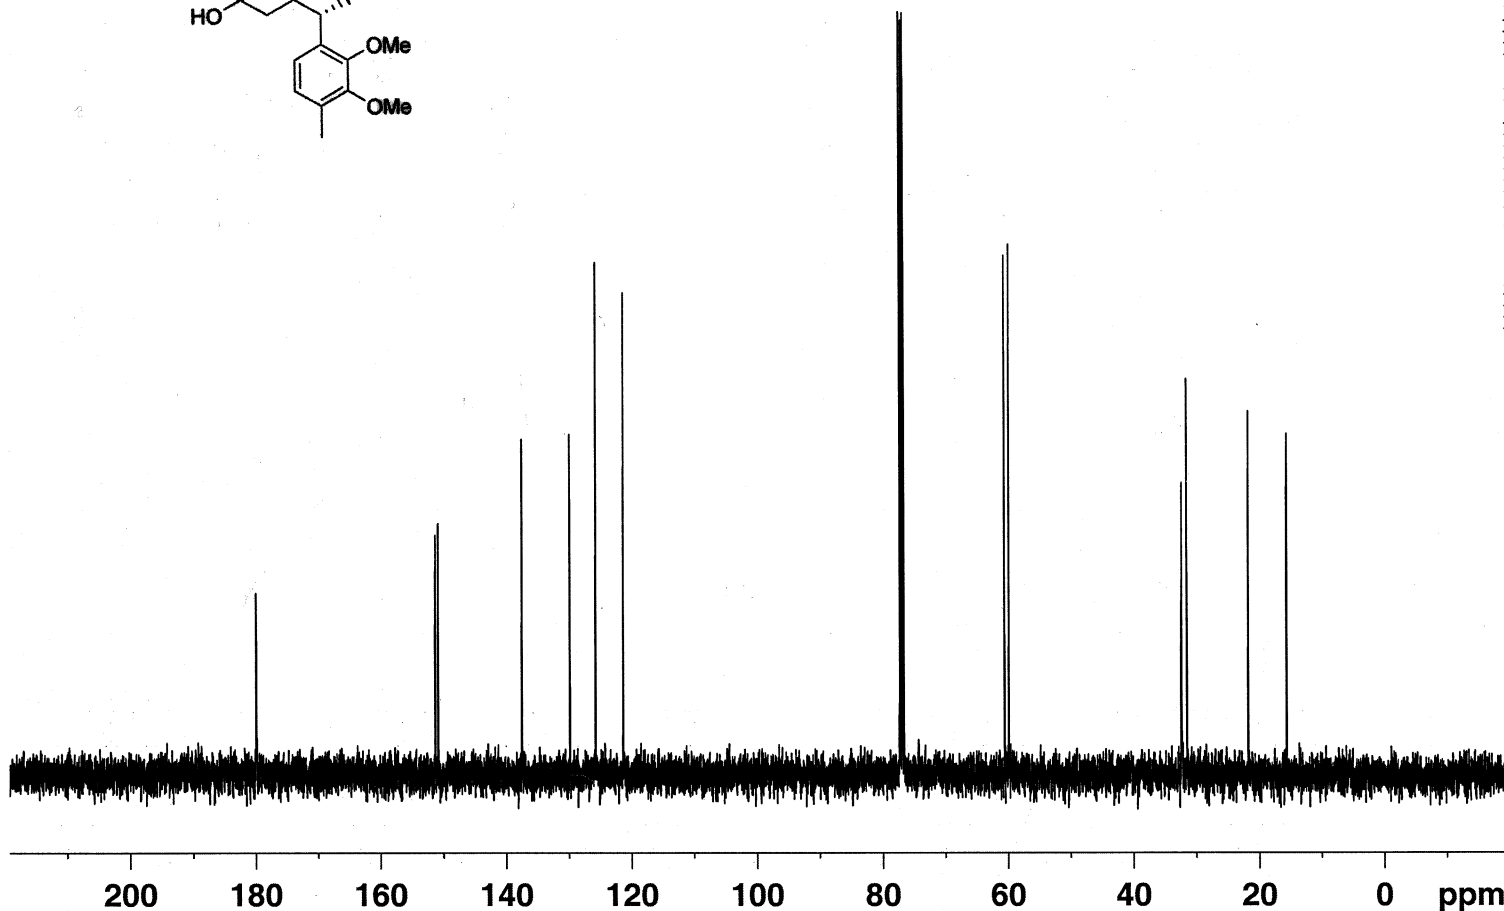

7.605

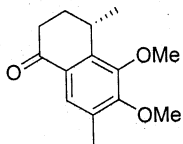

3.858  
3.849  
3.840  
3.378  
3.374  
3.368  
3.364  
3.360  
3.354  
3.350  
2.766  
2.756  
2.737  
2.731  
2.726  
2.721  
2.701  
2.691  
2.503  
2.498  
2.495  
2.490  
2.468  
2.463  
2.459  
2.454  
2.235  
2.226  
2.213  
2.198  
2.189  
2.178  
2.169  
2.160  
1.962  
1.957  
1.952  
1.947  
1.942  
1.935  
1.930  
1.925  
1.920  
1.915  
1.295  
1.280  
1.174

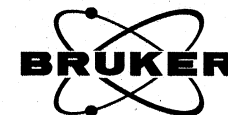

Current Data Parameters  
NAME 5-59  
EXPNO 1  
PROCNO 1

F2 - Acquisition Parameters  
Date\_ 20060328  
Time 13.15  
INSTRUM spect  
PROBHD 5 mm Multinucl  
PULPROG zg30  
TD 65536  
SOLVENT CDCl3  
NS 16  
DS 2  
SWH 10330.578 Hz  
FIDRES 0.157632 Hz  
AQ 3.1719923 sec  
RG 28.5  
DW 48.400 usec  
DE 6.00 usec  
TE 300.2 K  
D1 1.0000000 sec  
MCREST 0.0000000 sec  
MCWRK 0.0150000 sec

===== CHANNEL f1 =====  
NUC1 1H  
P1 14.80 usec  
PL1 -1.00 dB  
SFO1 500.0230878 MHz

F2 - Processing parameters  
SI 32768  
SF 500.0200110 MHz  
WDW EM  
SSB 0  
LB 0.30 Hz  
GB 0  
PC 1.00

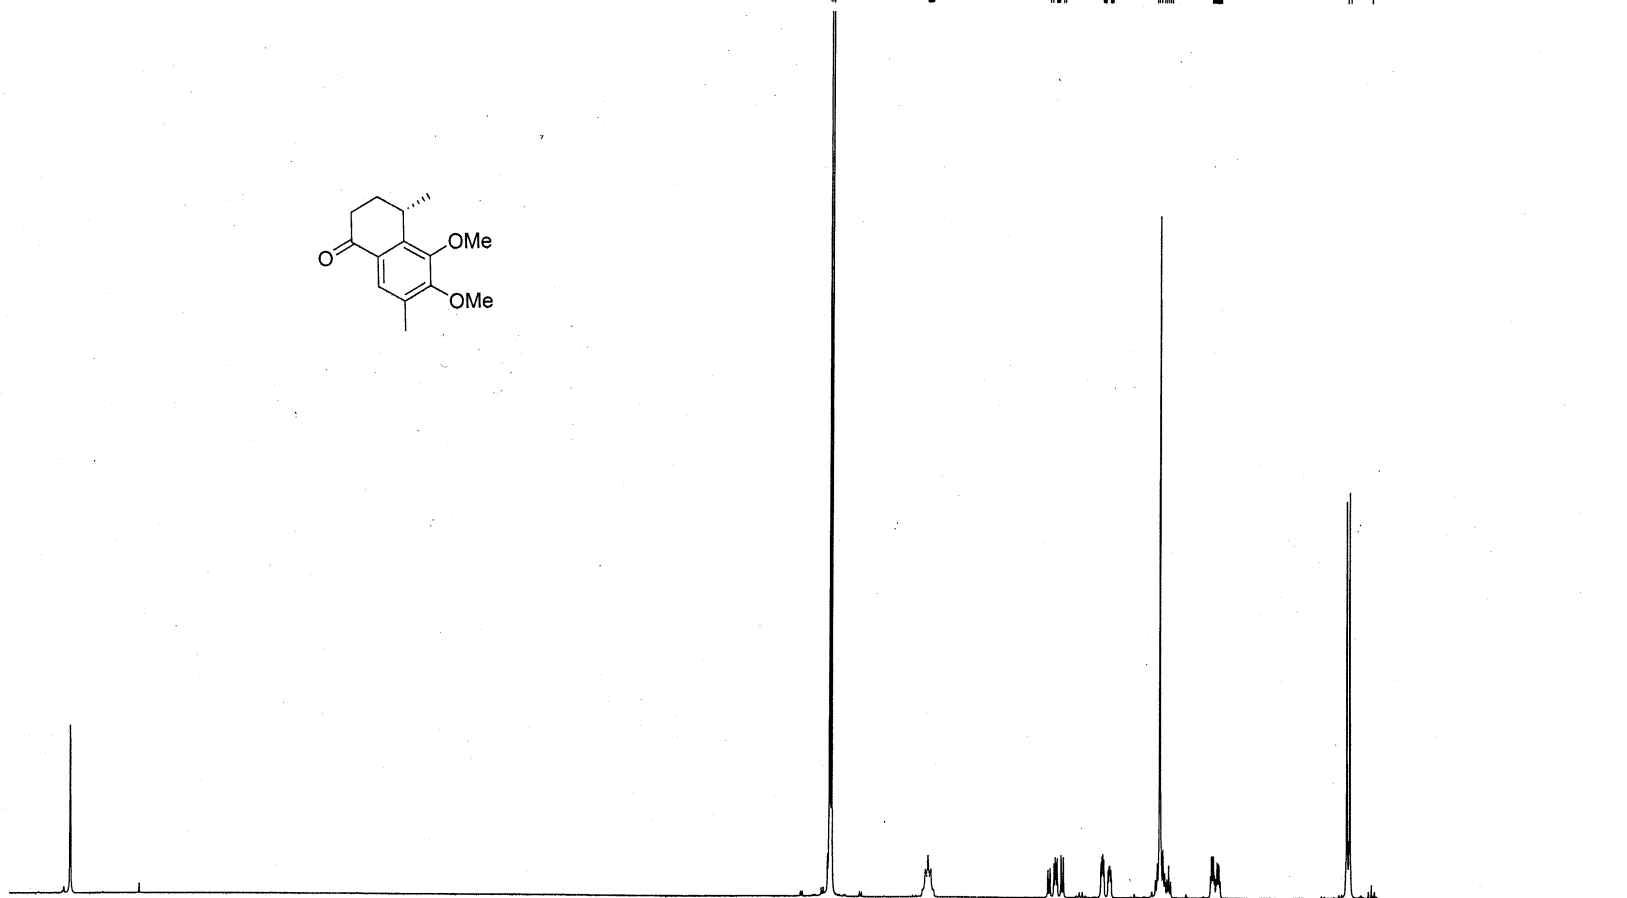

0.86

5.96

1.00

1.03

1.03

0.20

3.04

0.73

1.04

3.12

ppm

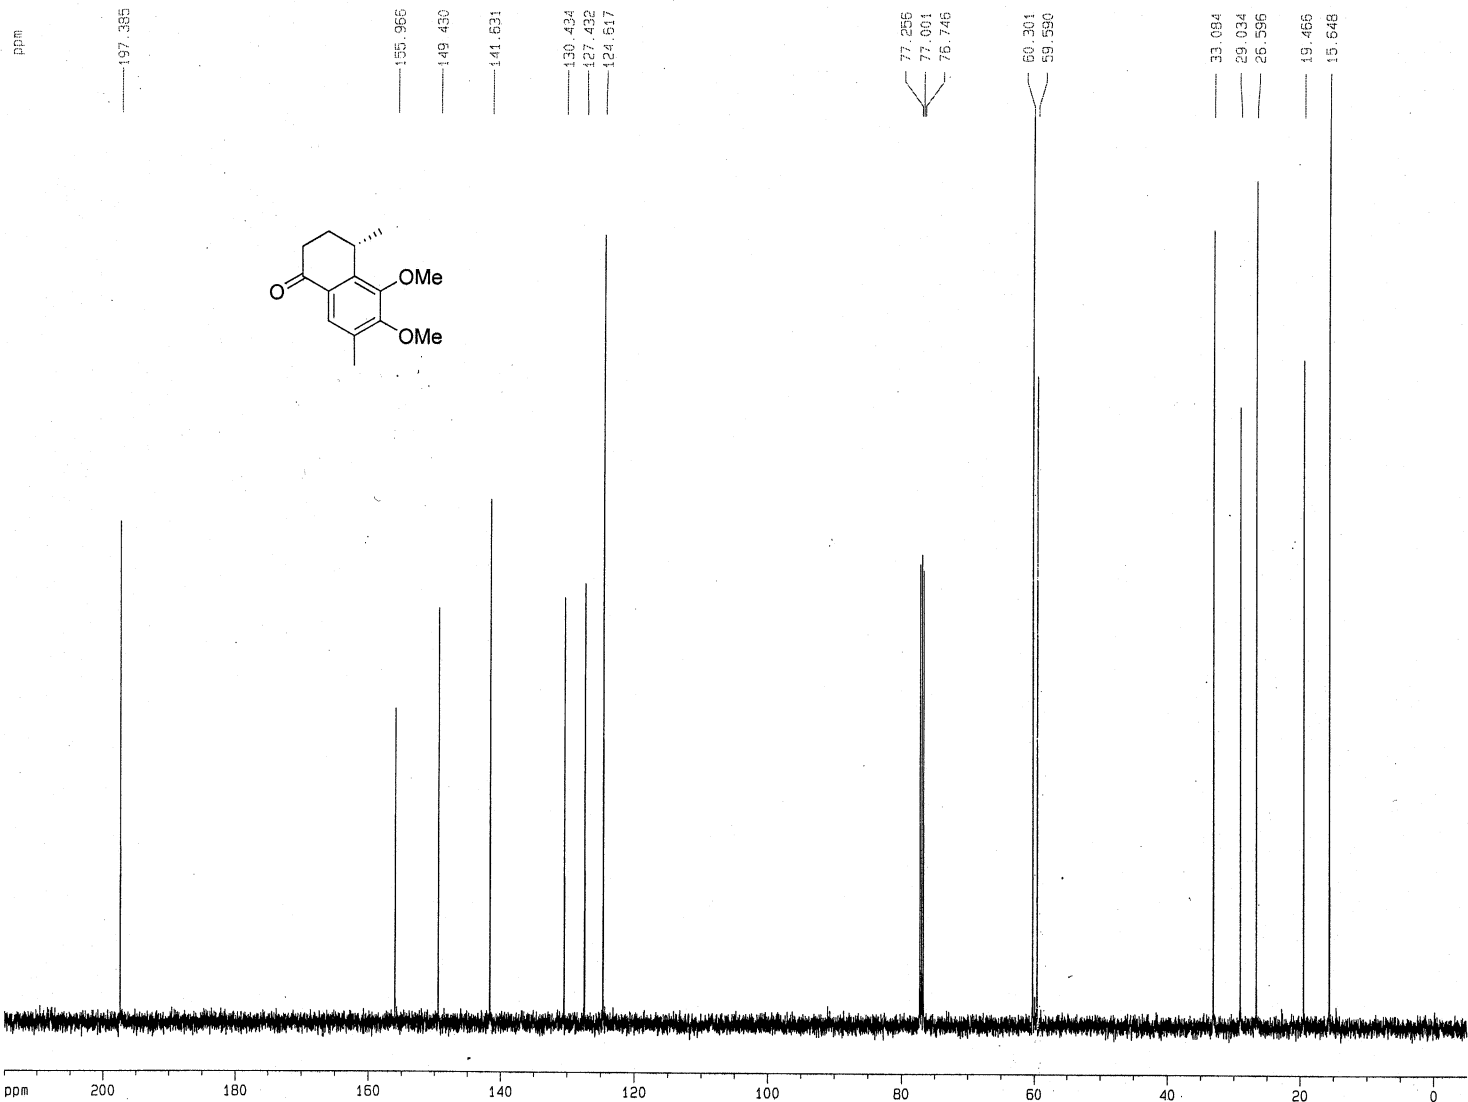

Current Data Parameters  
 NAME 5-59  
 EXPNO 2  
 PROCNO 1

F2 - Acquisition Parameters  
 Date\_ 20060328  
 Time 13.18  
 INSTRUM spect  
 PROBHD 5 mm Multinuc1  
 PULPROG zgpg30  
 TD 65536  
 SOLVENT CDCl3  
 NS 46  
 DS 4  
 SWH 30030.029 Hz  
 FIDRES 0.458222 Hz  
 AQ 1.0912244 sec  
 RG 11585.2  
 DW 16.650 usec  
 DE 6.00 usec  
 TE 300.2 K  
 D1 2.0000000 sec  
 d11 0.0300000 sec  
 DELTA 1.89999998 sec  
 MCREST 0.0000000 sec  
 MCWRK 0.0150000 sec

----- CHANNEL f1 -----  
 NUC1 13C  
 P1 13.00 usec  
 PL1 3.00 dB  
 SF01 125.7427020 MHz

----- CHANNEL f2 -----  
 CPDPRG2 waltz16  
 NUC2 1H  
 PCPD2 100.00 usec  
 PL2 -1.00 dB  
 PL12 18.80 dB  
 PL13 120.00 dB  
 SF02 500.0220001 MHz

F2 - Processing parameters  
 SI 32768  
 SF 125.7301422 MHz  
 WDW EM  
 SSB 0  
 LB 1.00 Hz  
 GB 0  
 PC 1.40

1D NMR plot parameters  
 CX 30.00 cm  
 CY 19.00 cm  
 F1P 215.000 ppm  
 F1 27031.98 Hz  
 F2P -5.000 ppm  
 F2 -628.65 Hz  
 PPMCM 7.33333 ppm/cm  
 HZCM 922.02100 Hz/cm

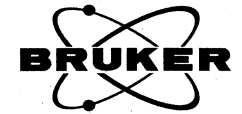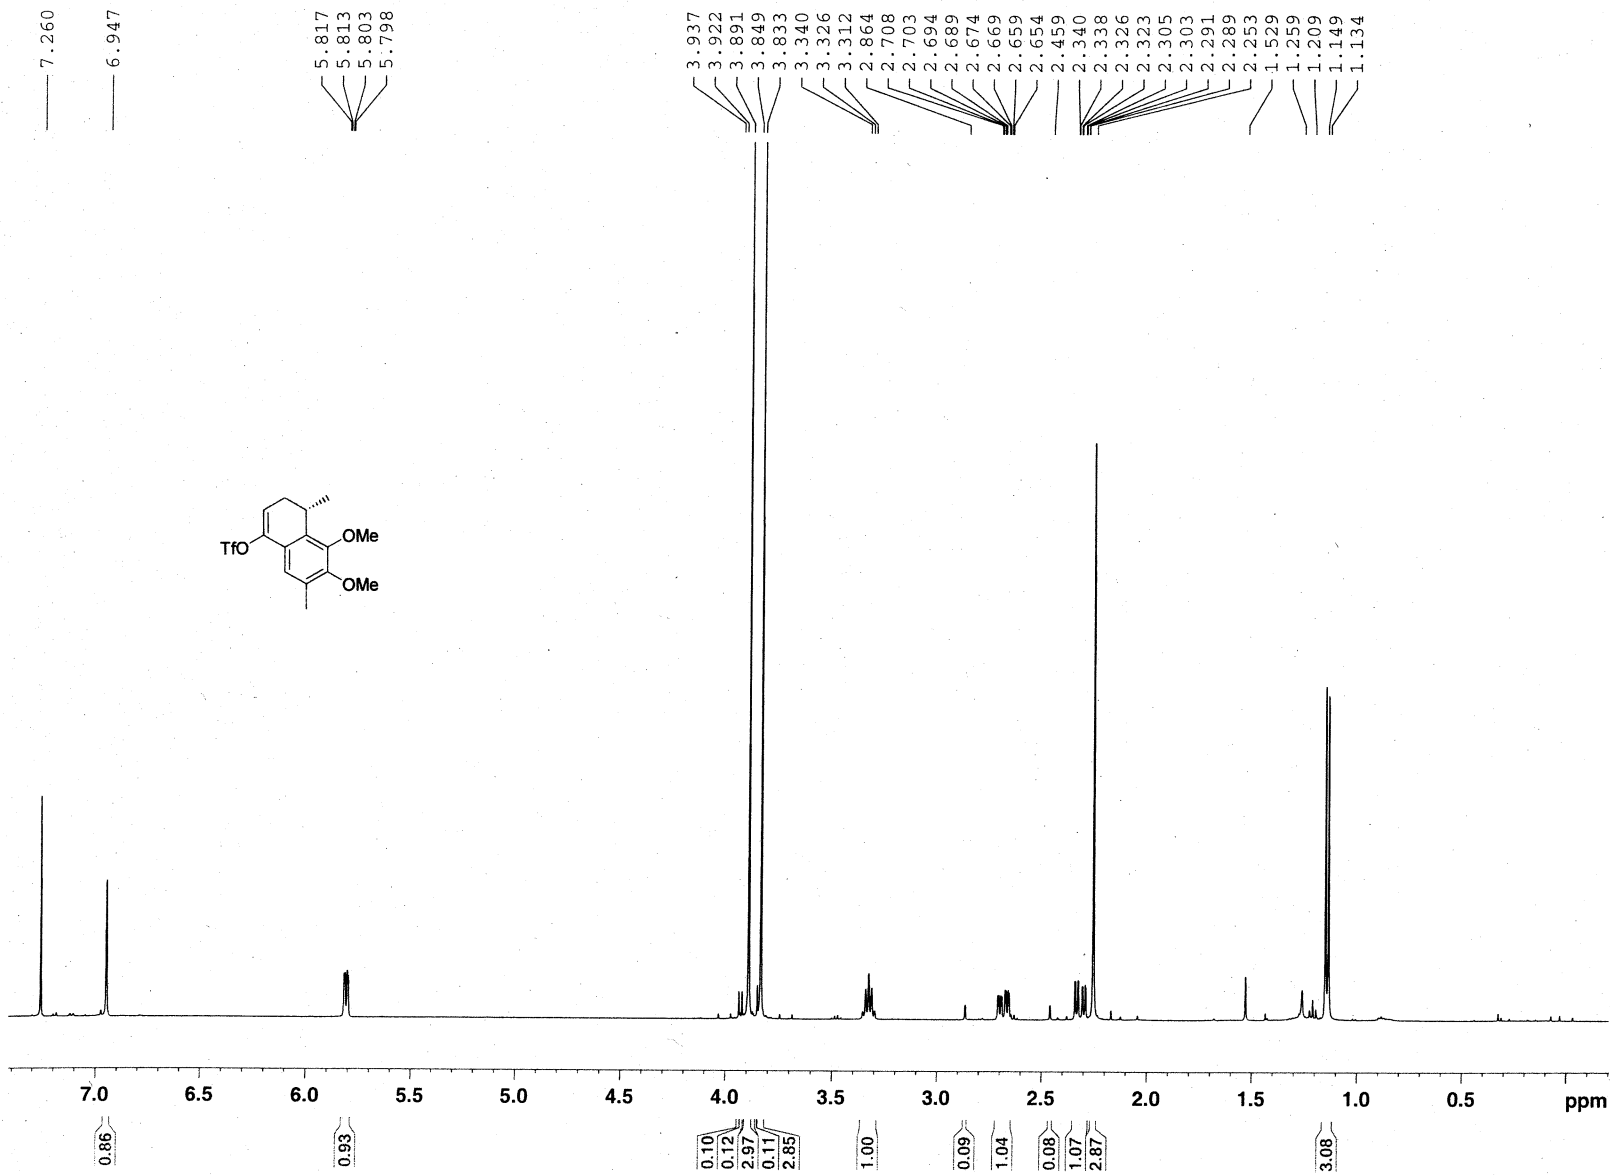

Current Data Parameters  
NAME 5-51  
EXPNO 1  
PROCNO 1

F2 - Acquisition Parameters  
Date\_ 20060324  
Time 11.07  
INSTRUM spect  
PROBHD 5 mm Multinucl  
PULPROG zg30  
TD 65536  
SOLVENT CDCl3  
NS 16  
DS 2  
SWH 10330.578 Hz  
FIDRES 0.157632 Hz  
AQ 3.1719923 sec  
RG 456.1  
DW 48.400 usec  
DE 6.00 usec  
TE 300.2 K  
D1 1.00000000 sec  
MCREST 0.00000000 sec  
MCWRK 0.01500000 sec

===== CHANNEL f1 =====  
NUC1 1H  
P1 14.80 usec  
PL1 -1.00 dB  
SFO1 500.0230878 MHz

F2 - Processing parameters  
SI 32768  
SF 500.0200116 MHz  
WDW EM  
SSB 0  
LB 0.30 Hz  
GB 0  
PC 1.40

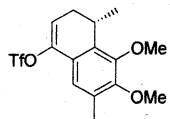

Current Data Parameters  
 NAME 5-51  
 EXPNO 2  
 PROCNO 1

F2 - Acquisition Parameters  
 Date\_ 20060324  
 Time 11.11  
 INSTRUM spect  
 PROBHD 5 mm Multinucl  
 PULPROG zgpg30  
 TD 65536  
 SOLVENT CDCl3  
 NS 370  
 DS 4  
 SWH 30030.029 Hz  
 FIDRES 0.458222 Hz  
 AQ 1.0912244 sec  
 RG 5792.6  
 DW 16.650 usec  
 DE 6.00 usec  
 TE 300.2 K  
 D1 2.0000000 sec  
 d11 0.0300000 sec  
 DELTA 1.89999998 sec  
 MCREST 0.0000000 sec  
 MCWRK 0.01500000 sec

===== CHANNEL f1 =====  
 NUC1 13C  
 P1 13.00 usec  
 PL1 3.00 dB  
 SF01 125.7427020 MHz

===== CHANNEL f2 =====  
 CPDPRG2 waltz16  
 NUC2 1H  
 PCPD2 100.00 usec  
 PL2 -1.00 dB  
 PL12 18.80 dB  
 PL13 120.00 dB  
 SF02 500.0220001 MHz

F2 - Processing parameters  
 SI 32768  
 SF 125.7301290 MHz  
 WDW EM  
 SSB 0  
 LB 1.00 Hz  
 GB 0  
 PC 1.40

1D NMR plot parameters  
 CX 30.00 cm  
 CY 19.00 cm  
 F1P 219.423 ppm  
 F1 27568.03 Hz  
 F2P -19.423 ppm  
 F2 -2442.00 Hz  
 PPMCM 7.95150 ppm/cm  
 HZCM 1001.00104 Hz/cm

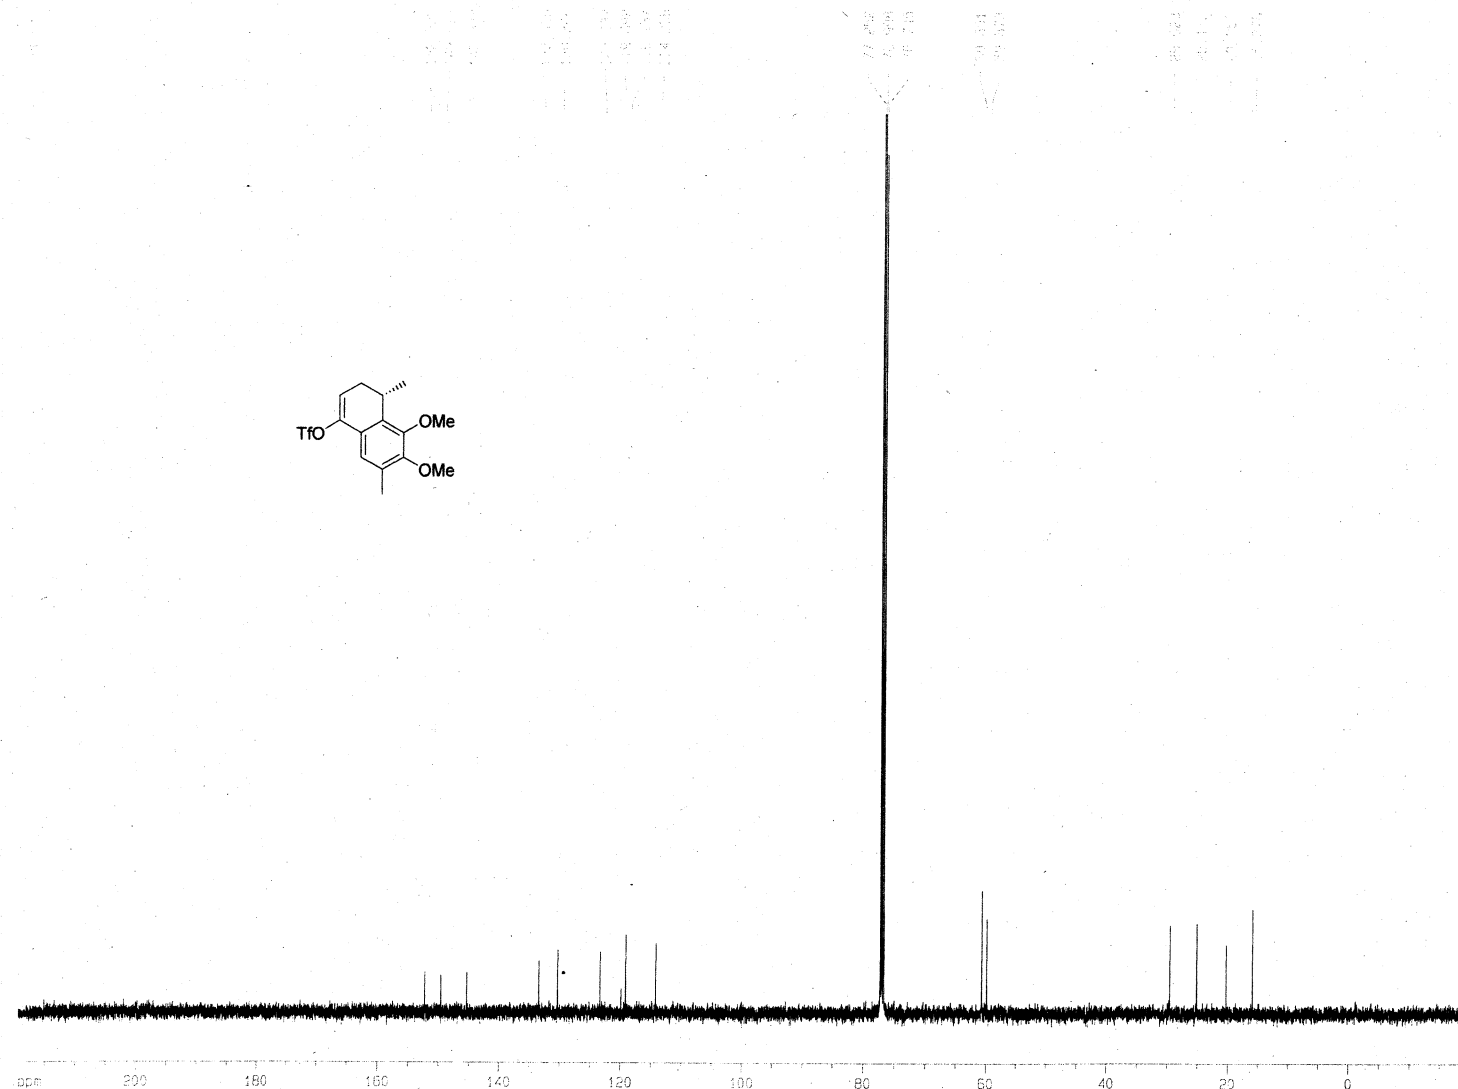



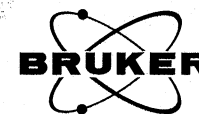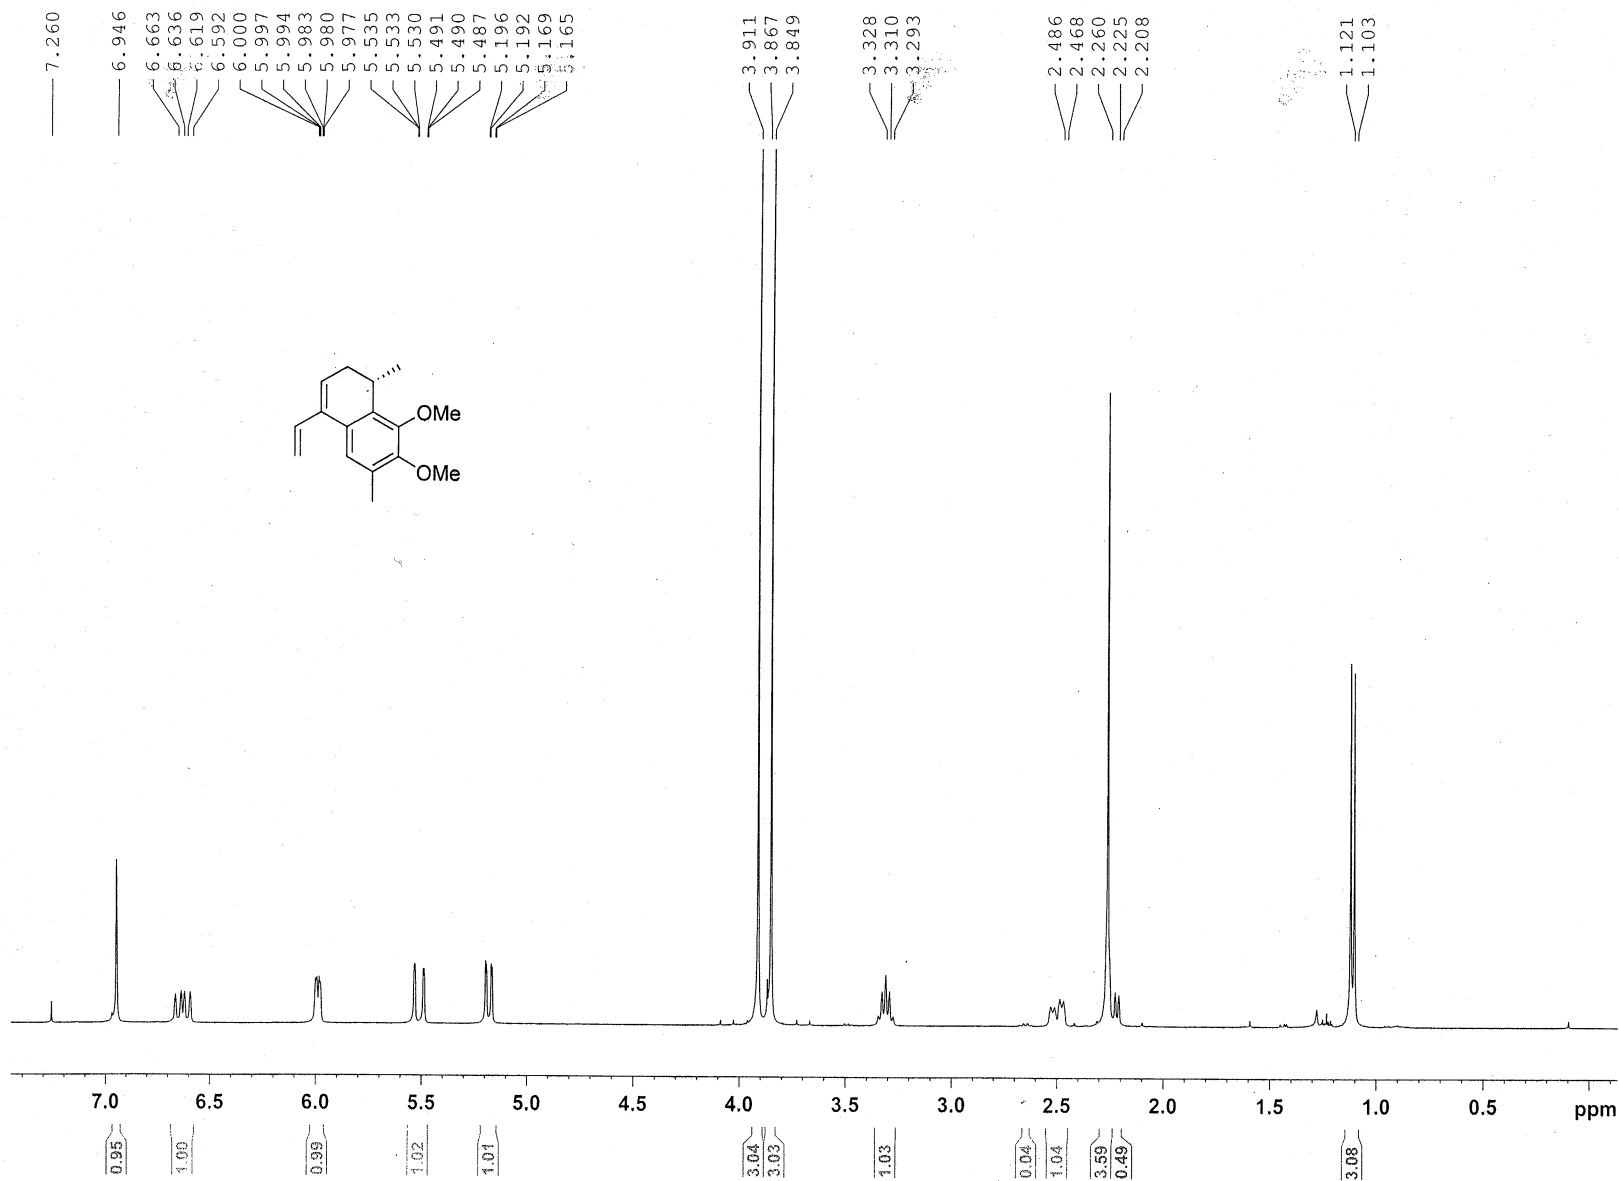

Current Data Parameters  
NAME 7-4643  
EXPNO 1  
PROCNO 1

F2 - Acquisition Parameters  
Date\_ 20070205  
Time\_ 14.17  
INSTRUM spect  
PROBHD 5 mm QNP 1H/13  
PULPROG zg30  
TD 65536  
SOLVENT CDCl3  
NS 16  
DS 2  
SWH 8278.146 Hz  
FIDRES 0.126314 Hz  
AQ 3.9584243 sec  
RG 45.3  
DW 60.400 usec  
DE 6.00 usec  
TE 300.2 K  
D1 1.00000000 sec  
MCREST 0.00000000 sec  
MCWRK 0.01500000 sec

==== CHANNEL f1 =====  
NUC1 1H  
P1 13.00 usec  
PL1 0.00 dB  
SFO1 400.1324710 MHz

F2 - Processing parameters  
SI 32768  
SF 400.1300096 MHz  
WDW EM  
SSB 0  
LB 0.30 Hz  
GB 0  
PC 1.00

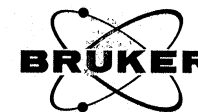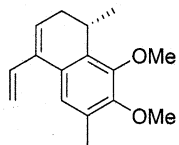

150.56  
149.55  
135.72  
135.39  
133.02  
129.10  
129.01  
122.89  
121.83  
114.95  
76.68  
75.68  
60.66  
59.88  
30.31  
25.37  
19.85  
15.77

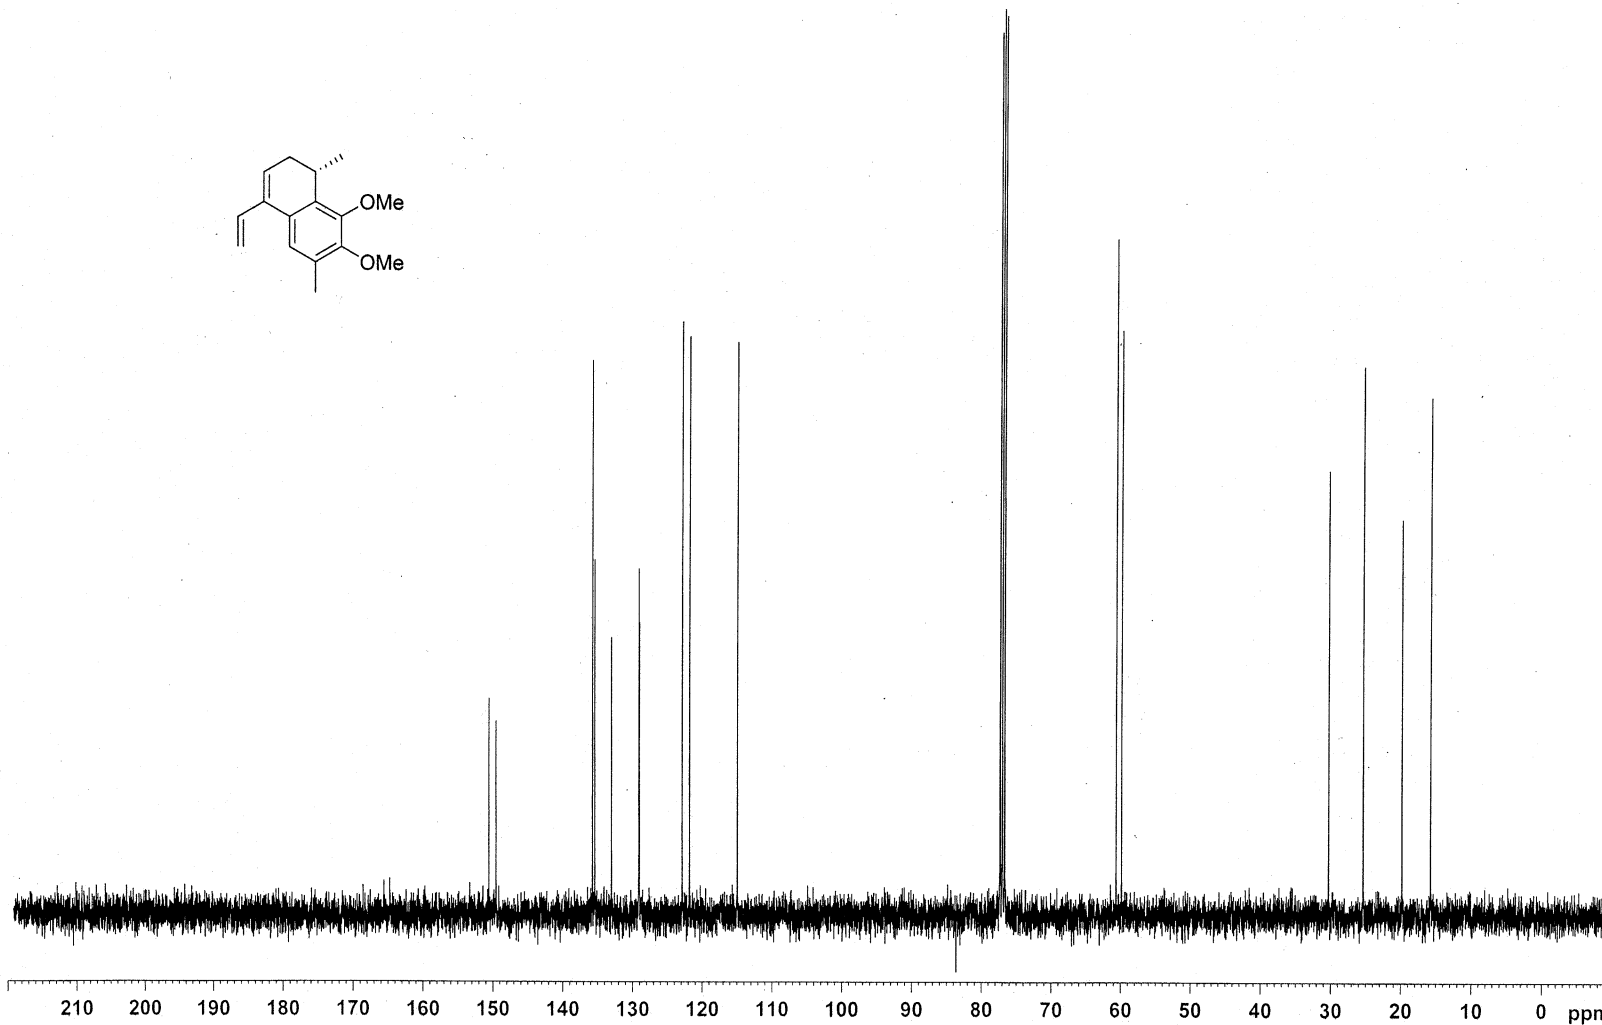

Current Data Parameters  
NAME 7-46  
EXPNO 2  
PROCNO 1

F2 - Acquisition Parameters  
Date\_ 20070205  
Time 14.25  
INSTRUM spect  
PROBHD 5 mm QNP 1H/13  
PULPROG zgpg30  
TD 65536  
SOLVENT CDCl3  
NS 99  
DS 4  
SWH 23980.814 Hz  
FIDRES 0.365918 Hz  
AQ 1.3664756 sec  
RG 8192  
DW 20.850 usec  
DE 6.00 usec  
TE 300.2 K  
D1 2.00000000 sec  
d11 0.03000000 sec  
DELTA 1.89999998 sec  
MCREST 0.00000000 sec  
MCWRK 0.01500000 sec

===== CHANNEL f1 =====  
NUC1 13C  
P1 10.50 usec  
PL1 0.00 dB  
SFO1 100.6228298 MHz

===== CHANNEL f2 =====  
CPDPRG2 waltz16  
NUC2 1H  
PCPD2 80.00 usec  
PL2 -6.00 dB  
PL12 14.56 dB  
PL13 120.00 dB  
SFO2 400.1316005 MHz

F2 - Processing parameters  
SI 32768  
SF 100.6127729 MHz  
WDW EM  
SSB 0  
LB 1.00 Hz  
GB 0  
PC 1.00

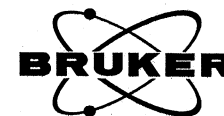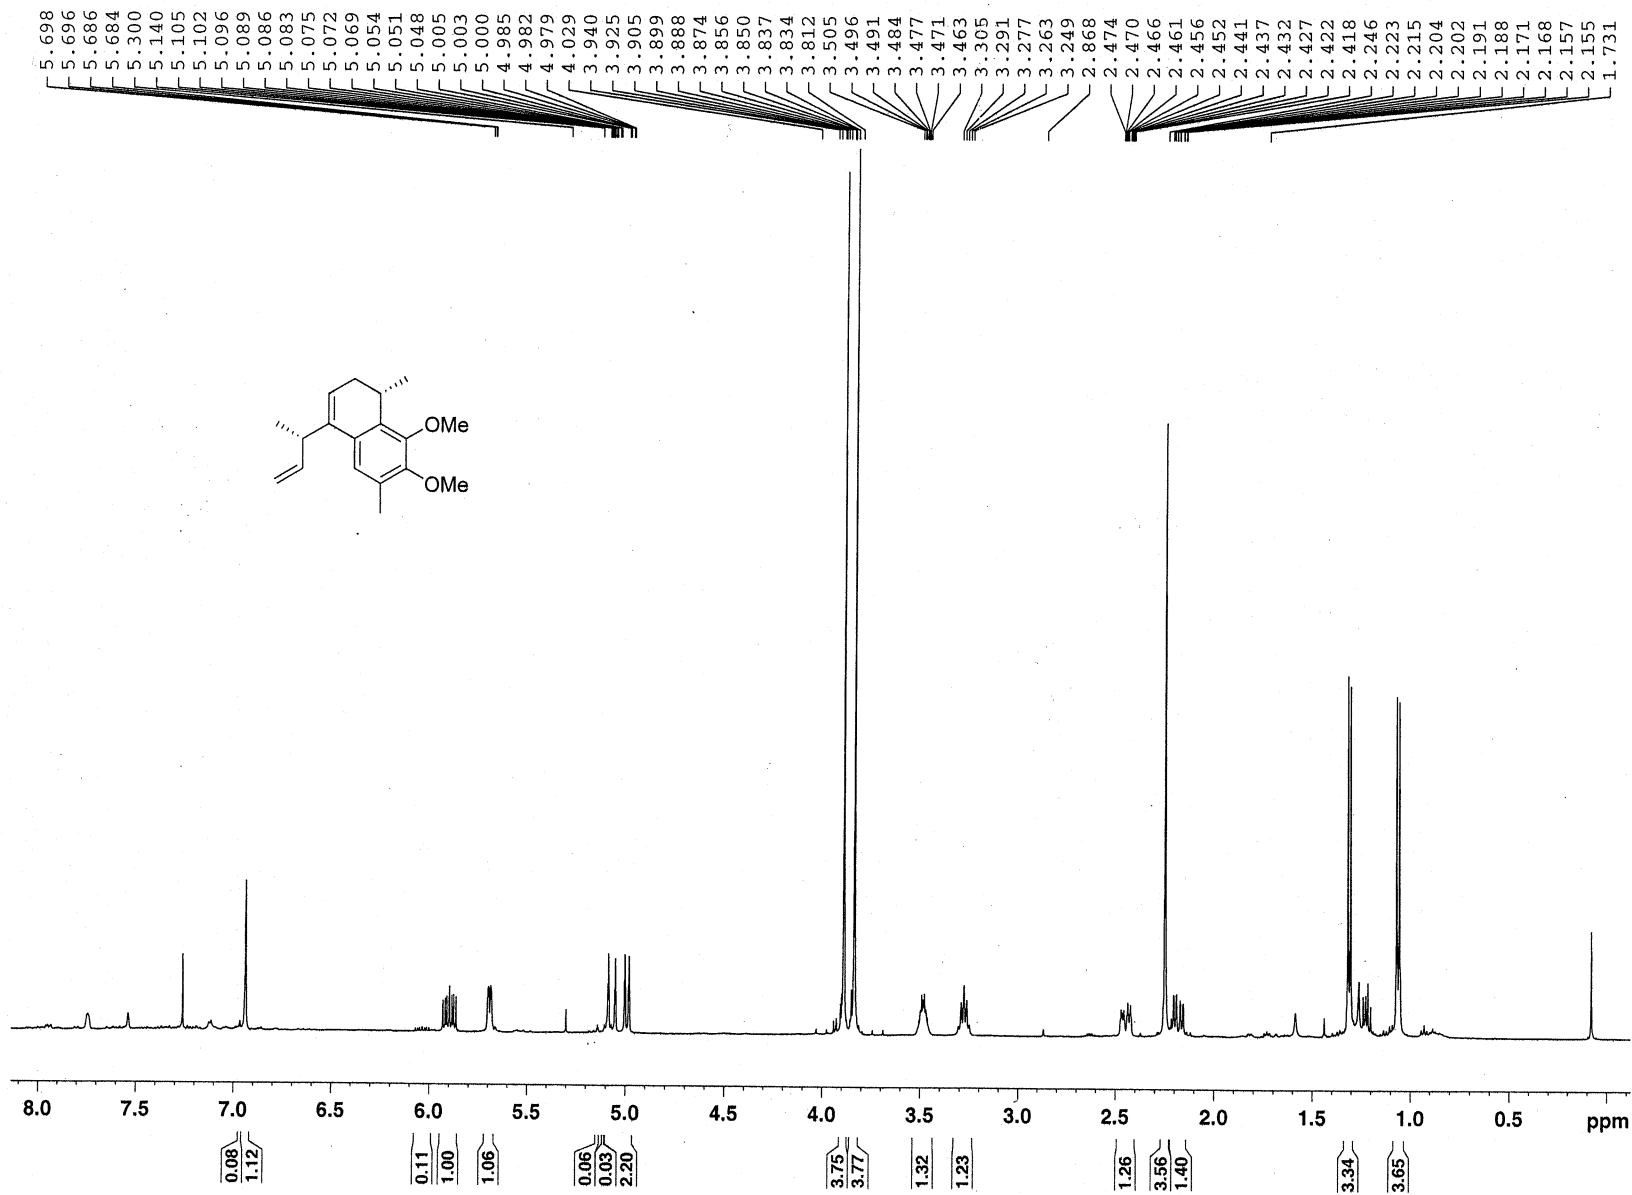

Current Data Parameters  
NAME 8-51  
EXPNO 1  
PROCNO 1

F2 - Acquisition Parameters  
Date\_ 20070702  
Time 15:37  
INSTRUM spect  
PROBHD 5 mm Multinucl  
PULPROG zg30  
TD 65536  
SOLVENT CDCl3  
NS 16  
DS 2  
SWH 10330.578 Hz  
FIDRES 0.157632 Hz  
AQ 3.1719923 sec  
RG 143.7  
DW 48.400 usec  
DE 6.00 usec  
TE 294.2 K  
D1 1.00000000 sec  
MCREST 0.00000000 sec  
MCWRK 0.01500000 sec

----- CHANNEL f1 -----  
NUC1 1H  
P1 14.80 usec  
PL1 -1.00 dB  
SFO1 500.0230878 MHz

F2 - Processing parameters  
SI 32768  
SF 500.0200119 MHz  
WDW EM  
SSB 0  
LB 0.30 Hz  
GB 0  
PC 1.40

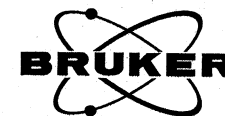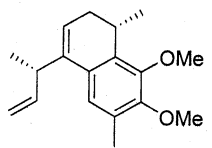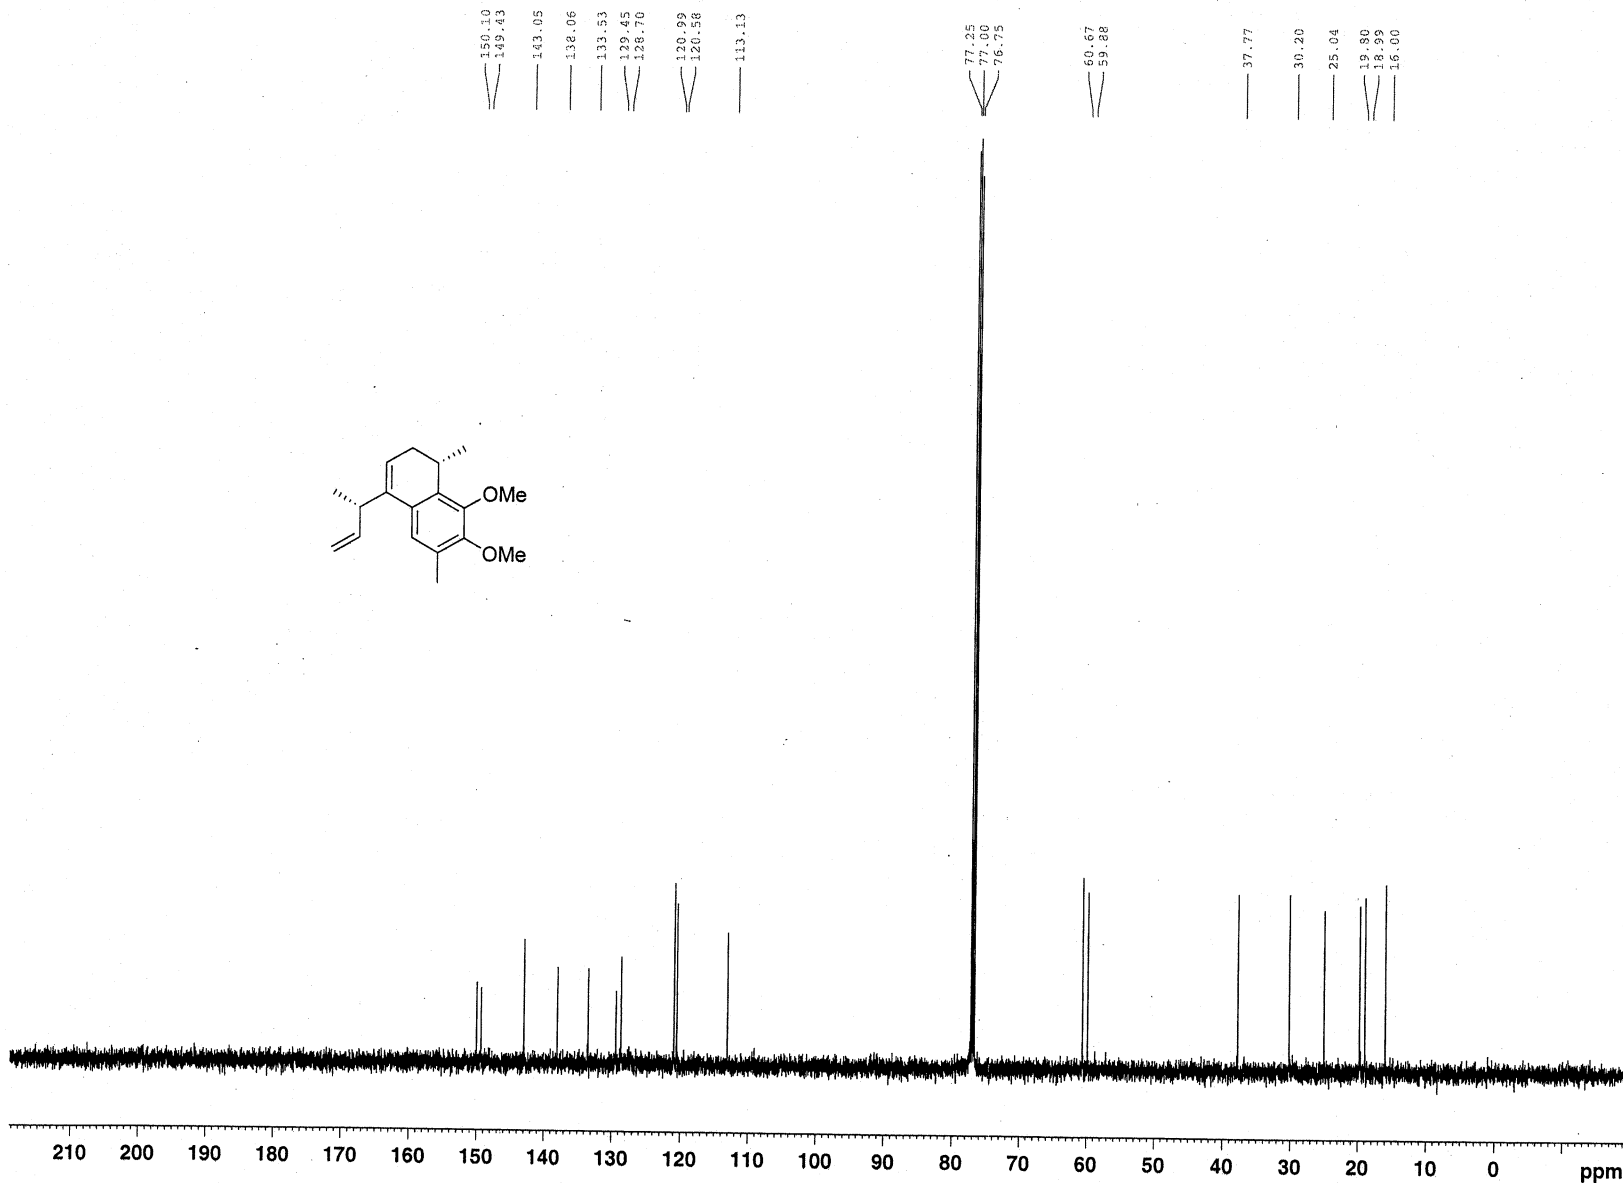

Current Data Parameters  
NAME 8-51  
EXPNO 2  
PROCNO 1

F2 - Acquisition Parameters  
Date\_ 20070702  
Time 15.42  
INSTRUM spect  
PROBHD 5 mm Multinucl  
PULPROG zgpg30  
TD 65536  
SOLVENT CDCl3  
NS 299  
DS 4  
SWH 30030.029 Hz  
FIDRES 0.458222 Hz  
AQ 1.0912244 sec  
RG 3649.1  
DW 16.650 usec  
DE 6.00 usec  
TE 295.2 K  
D1 2.0000000 sec  
d11 0.03000000 sec  
DELTA 1.89999998 sec  
MCREST 0.00000000 sec  
MCWRK 0.01500000 sec

==== CHANNEL f1 =====  
NUC1 13C  
P1 13.00 usec  
PL1 3.00 dB  
SFO1 125.7427020 MHz

==== CHANNEL f2 =====  
CPDPRG2 waltz16  
NUC2 1H  
PCPD2 100.00 usec  
PL2 -1.00 dB  
PL12 18.80 dB  
PL13 22.50 dB  
SFO2 500.0220001 MHz

F2 - Processing parameters  
SI 32768  
SF 125.7301331 MHz  
WDW EM  
SSB 0  
LB 1.00 Hz  
GB 0  
PC 1.00

Jun-51, 150°C/1'/10°C/min/250°C

\* RUN # 199 MAR 23. 1901 16:23:49  
START

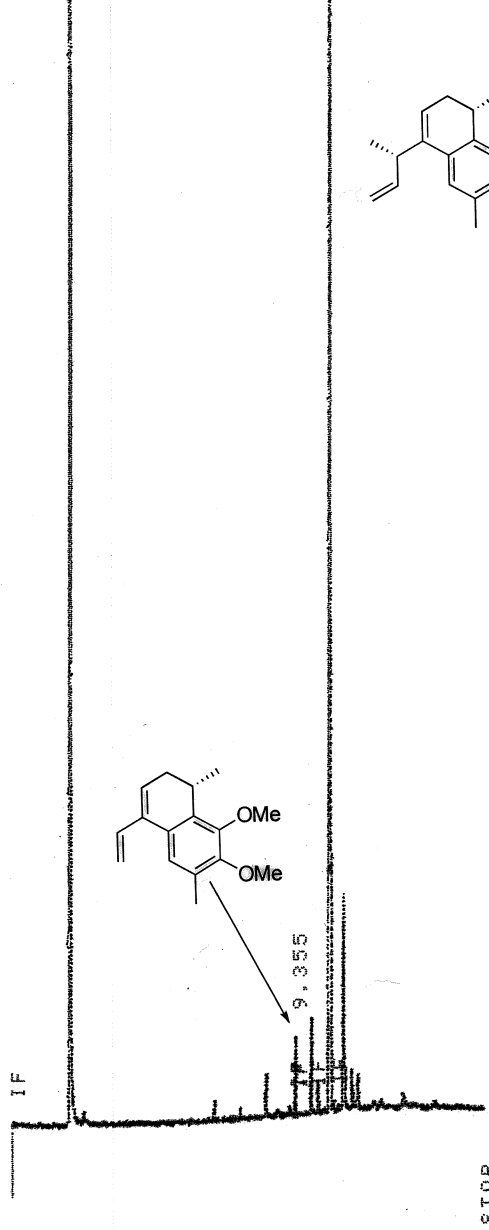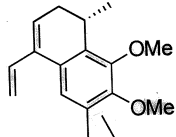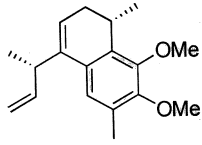

Closing signal file M:SIGNAL .BNC

RUN# 199 MAR 23. 1901 16:23:49

SIGNAL FILE: M:SIGNAL.BNC  
AREA%

| RT     | AREA   | TYPE | WIDTH | AREA%    |
|--------|--------|------|-------|----------|
| 9.355  | 4584   | I    | .034  | 1.72280  |
| 10.480 | 261494 | PV   | .037  | 98.27718 |

TOTAL AREA= 266078  
MUL FACTOR=1.0000E+00

VIII-51

150°C/15'/1.8°C/min/250°C

\*AN  
RUN # 215 MAR 25, 1901 20:43:36  
START

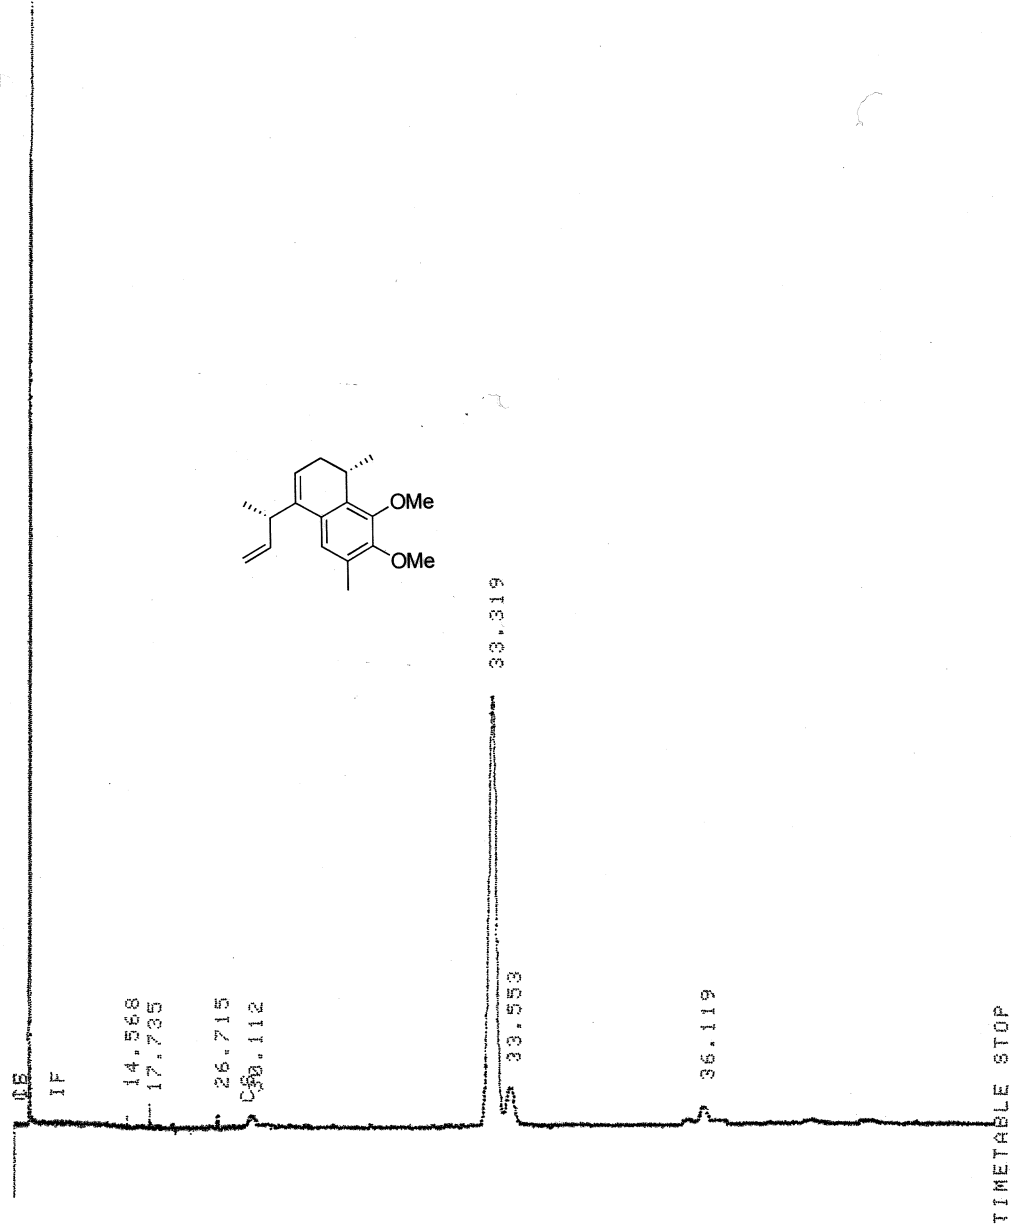

TIMETABLE STOP

Error storing signal to M:SIGNAL .BNA  
ATTEMPTED WRITE PAST END OF FILE

RUN# 215 MAR 25, 1901 20:43:36

| AREA% | RT     | AREA  | TYPE | WIDTH | AREA%    |
|-------|--------|-------|------|-------|----------|
|       | 33.319 | 85069 | VV   | .115  | 91.73939 |
|       | 33.553 | 7660  | VV   | .115  | 8.26063  |

TOTAL AREA= 92729  
MUL FACTOR=1.0000E+00

150°C/15'/1.3°C/min/250°C  
(Co-injection)

\* RUN # 213 MAR 25, 1901 18:41:15

START

IF

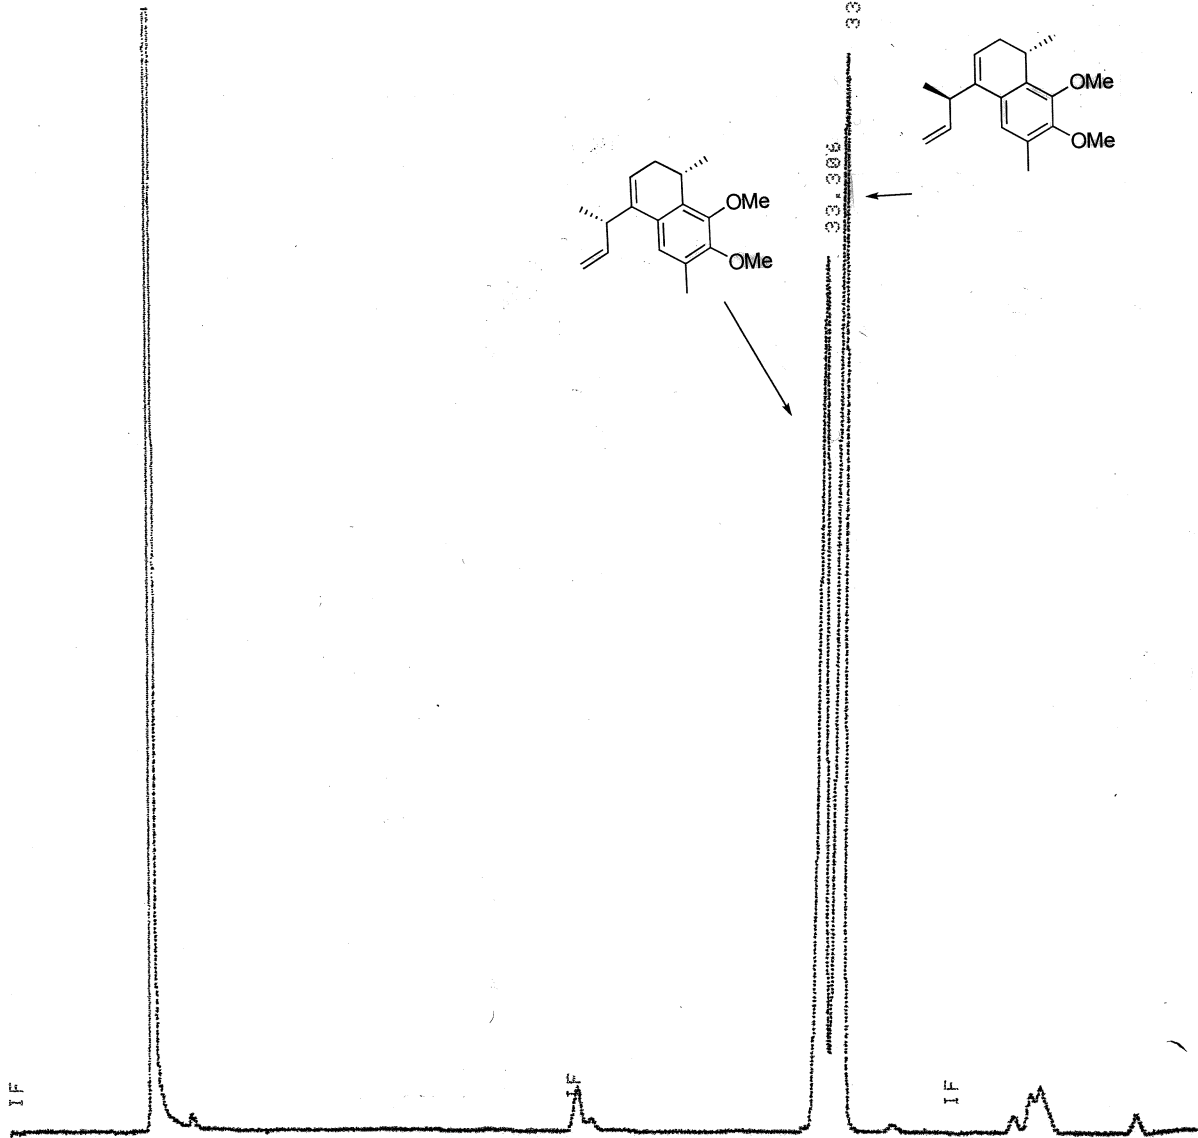

33.306

33.545

STOP

Closing signal file M:SIGNAL .BNC

RUN# 213 MAR 25, 1901 18:41:15

SIGNAL FILE: M:SIGNAL.BNC

| AREA% | RT     | AREA   | TYPE | WIDTH | AREA%    |
|-------|--------|--------|------|-------|----------|
|       | 33.306 | 175392 | VV   | .117  | 45.28144 |
|       | 33.545 | 211873 | VP   | .115  | 54.71856 |

TOTAL AREA= 387205

MUL FACTOR=1.00000E+00

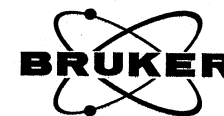

7.260  
6.945  
6.071  
6.059  
6.051  
6.038  
6.037  
6.024  
6.016  
6.004  
5.680  
5.678  
5.676  
5.667  
5.664  
5.145  
5.142  
5.139  
5.111  
5.107  
5.104  
5.097  
5.094  
5.091  
5.077  
5.074  
5.071  
3.928  
3.907  
3.893  
3.880  
3.855  
3.839  
3.477  
3.464  
3.451  
3.283  
3.269  
3.256  
2.476  
2.473  
2.468  
2.463  
2.458  
2.454  
2.443  
2.439  
2.435  
2.429  
2.425  
2.421  
2.253  
2.217  
2.189  
2.187  
2.175  
2.173  
2.155  
2.153  
2.141  
2.139  
1.320  
1.307  
1.266  
1.250  
1.242  
1.228  
1.068

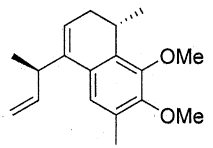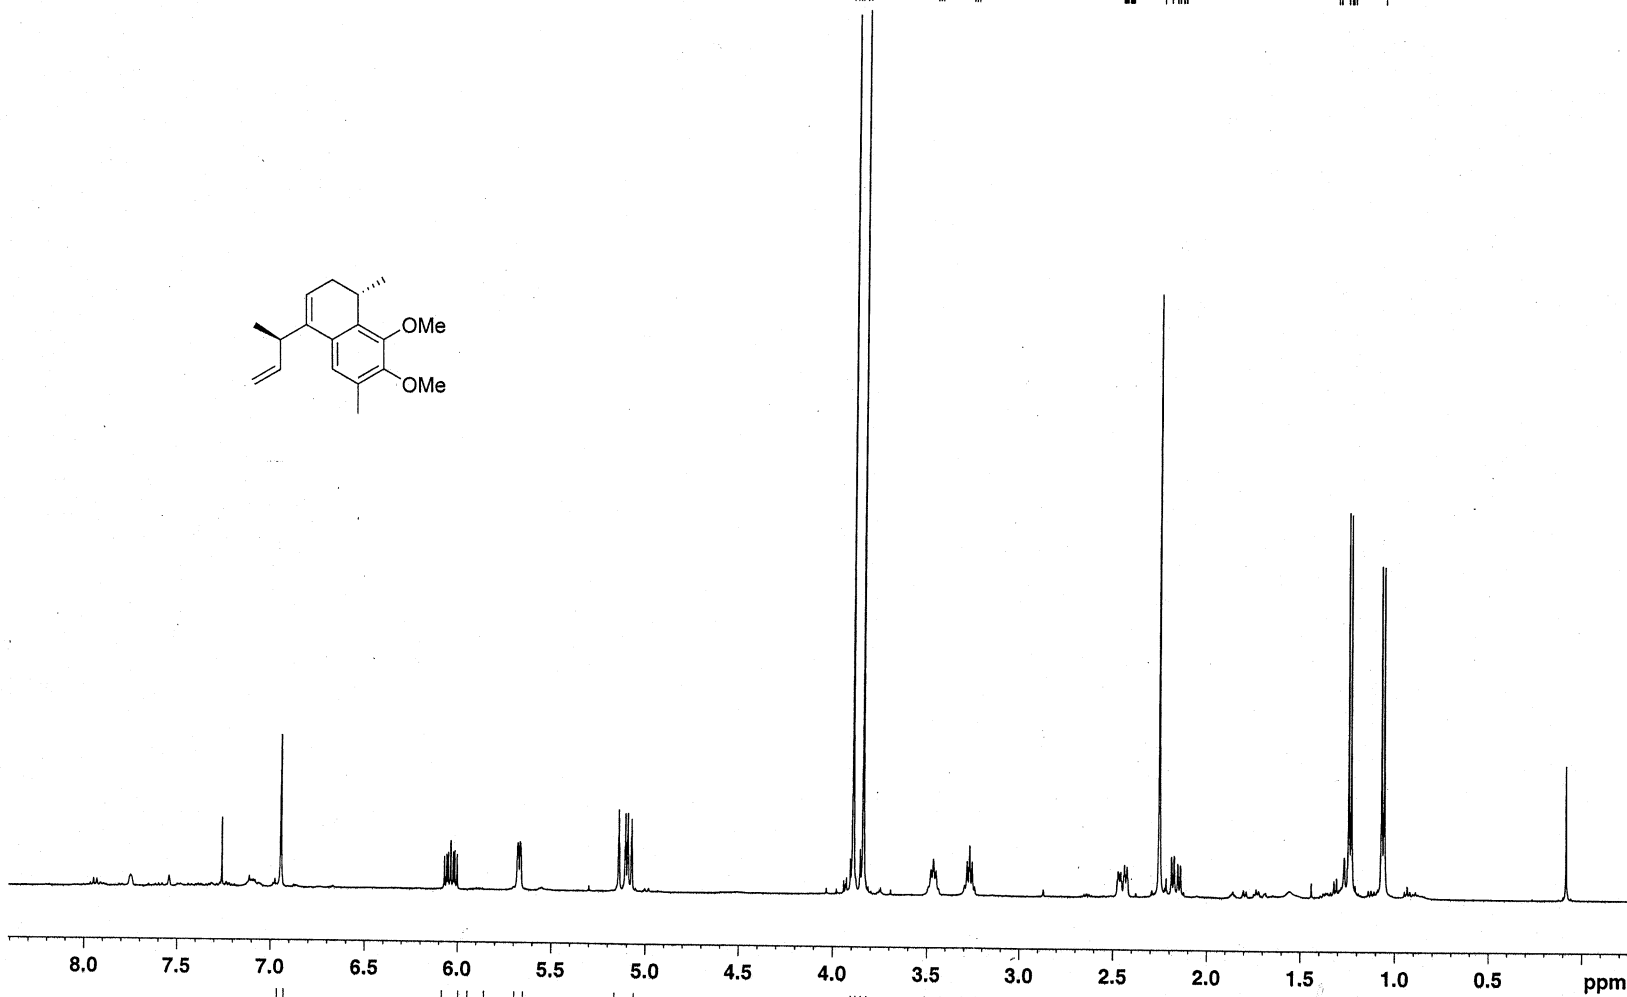

Current Data Parameters  
NAME 8-49  
EXPNO 4  
PROCNO 1

F2 - Acquisition Parameters  
Date\_ 20070706  
Time 12.09  
INSTRUM spect  
PROBHD 5 mm Multinucl  
PULPROG zg30  
TD 65536  
SOLVENT CDCl3  
NS 16  
DS 2  
SWH 10330.578 Hz  
FIDRES 0.157632 Hz  
AQ 3.1719923 sec  
RG 143.7  
DW 48.400 usec  
DE 6.00 usec  
TE 298.2 K  
D1 1.00000000 sec  
MCREST 0.00000000 sec  
MCWRK 0.01500000 sec

===== CHANNEL f1 =====  
NUC1 1H  
P1 14.80 usec  
PL1 -1.00 dB  
SFO1 500.0230878 MHz

F2 - Processing parameters  
SI 32768  
SF 500.0200116 MHz  
WDW EM  
SSB 0  
LB 0.30 Hz  
GB 0  
PC 1.40





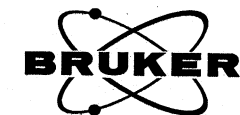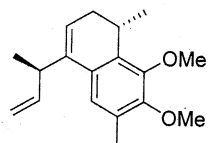

150.09  
139.39  
142.95  
138.66  
133.61  
129.63  
128.80  
120.65  
120.44  
113.33  
77.25  
77.00  
76.74  
60.67  
59.89  
37.89  
30.04  
25.04  
19.67  
19.62  
15.98

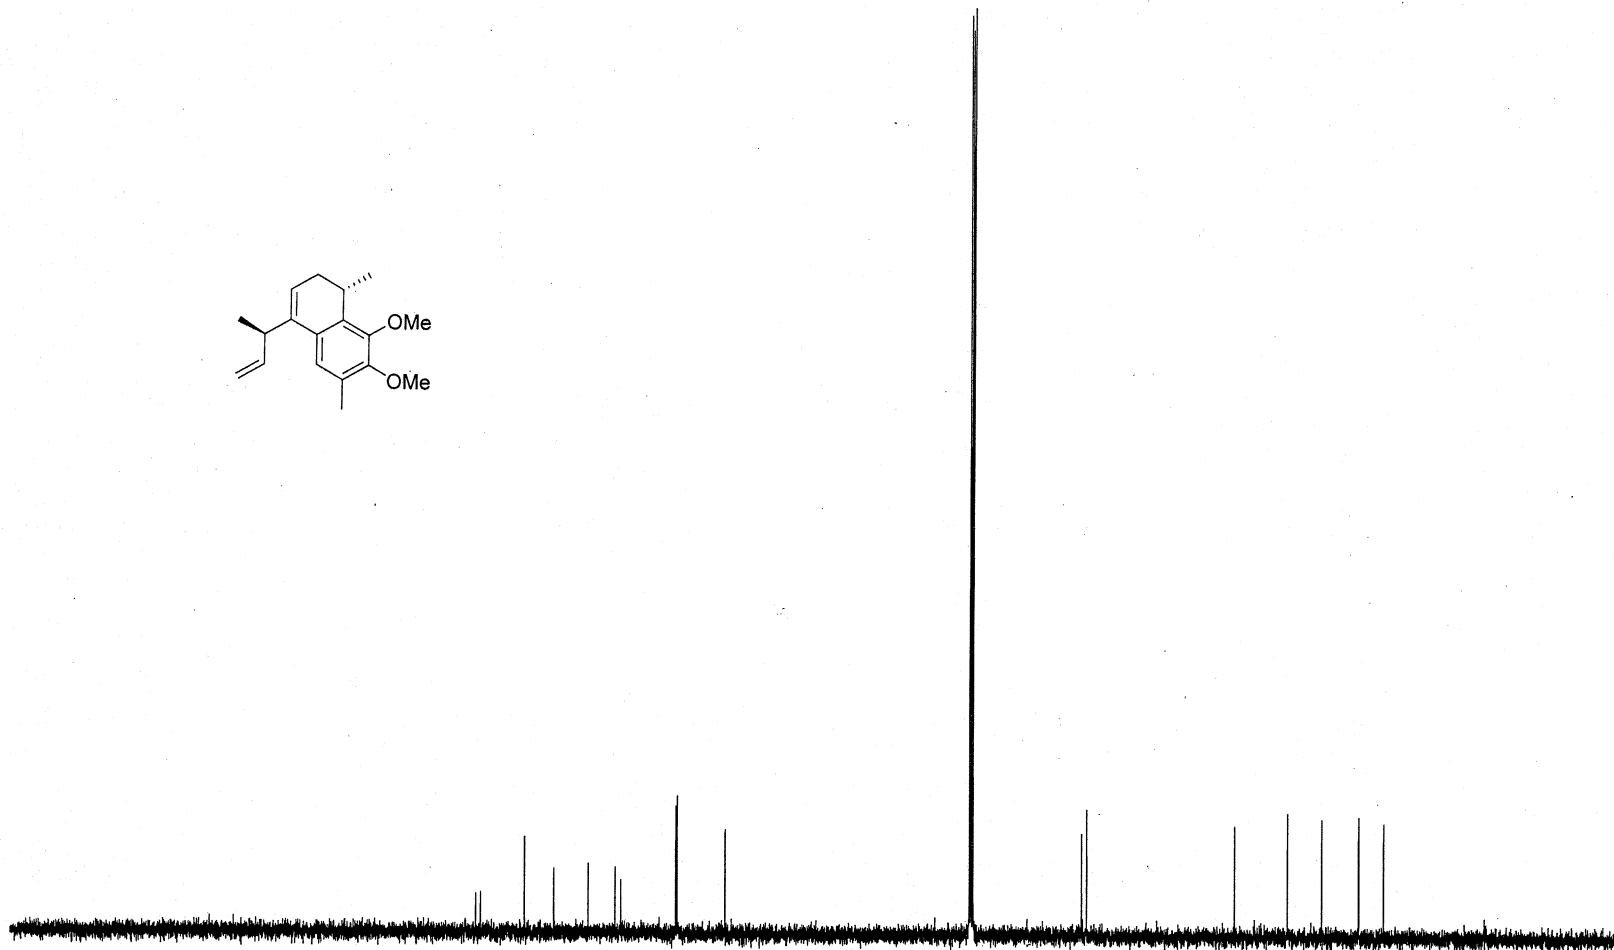

210 200 190 180 170 160 150 140 130 120 110 100 90 80 70 60 50 40 30 20 10 0 ppm

Current Data Parameters  
NAME 8-49  
EXPNO 2  
PROCNO 1

F2 - Acquisition Parameters  
Date\_ 20070702  
Time 8.13  
INSTRUM spect  
PROBHD 5 mm Multinucl  
PULPROG zgpg30  
TD 65536  
SOLVENT CDCl3  
NS 285  
DS 4  
SWH 30030.029 Hz  
FIDRES 0.458222 Hz  
AQ 1.0912244 sec  
RG 1625.5  
DW 16.650 usec  
DE 6.00 usec  
TE 293.2 K  
D1 2.00000000 sec  
d11 0.03000000 sec  
DELTA 1.89999998 sec  
MCREST 0.00000000 sec  
MCWRK 0.01500000 sec

===== CHANNEL f1 =====  
NUC1 13C  
P1 13.00 usec  
PL1 3.00 dB  
SFO1 125.7427020 MHz

===== CHANNEL f2 =====  
CPDPRG2 waltz16  
NUC2 1H  
PCPD2 100.00 usec  
PL2 -1.00 dB  
PL12 18.80 dB  
PL13 22.50 dB  
SFO2 500.0220001 MHz

F2 - Processing parameters  
SI 32768  
SF 125.7301349 MHz  
WDW EM  
SSB 0  
LB 1.00 Hz  
GB 0  
PC 1.00

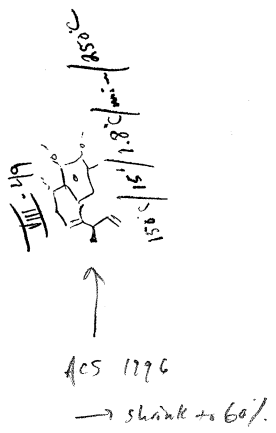

```

* AR REJ 1000 @
* DELETE TIME @
* TIME .01 INTG # 9 @
* TIME 33.0 INTG # -9 @
* TIME 34 INTG # 9 @
* TIME 40 STOP
* LIST: TIME @
0.010 INTG # = 9
33.000 INTG # = -9
34.000 INTG # = 9
40.000 STOP
  
```

\* RUN # 220 MAR 26, 1901 14:34:42

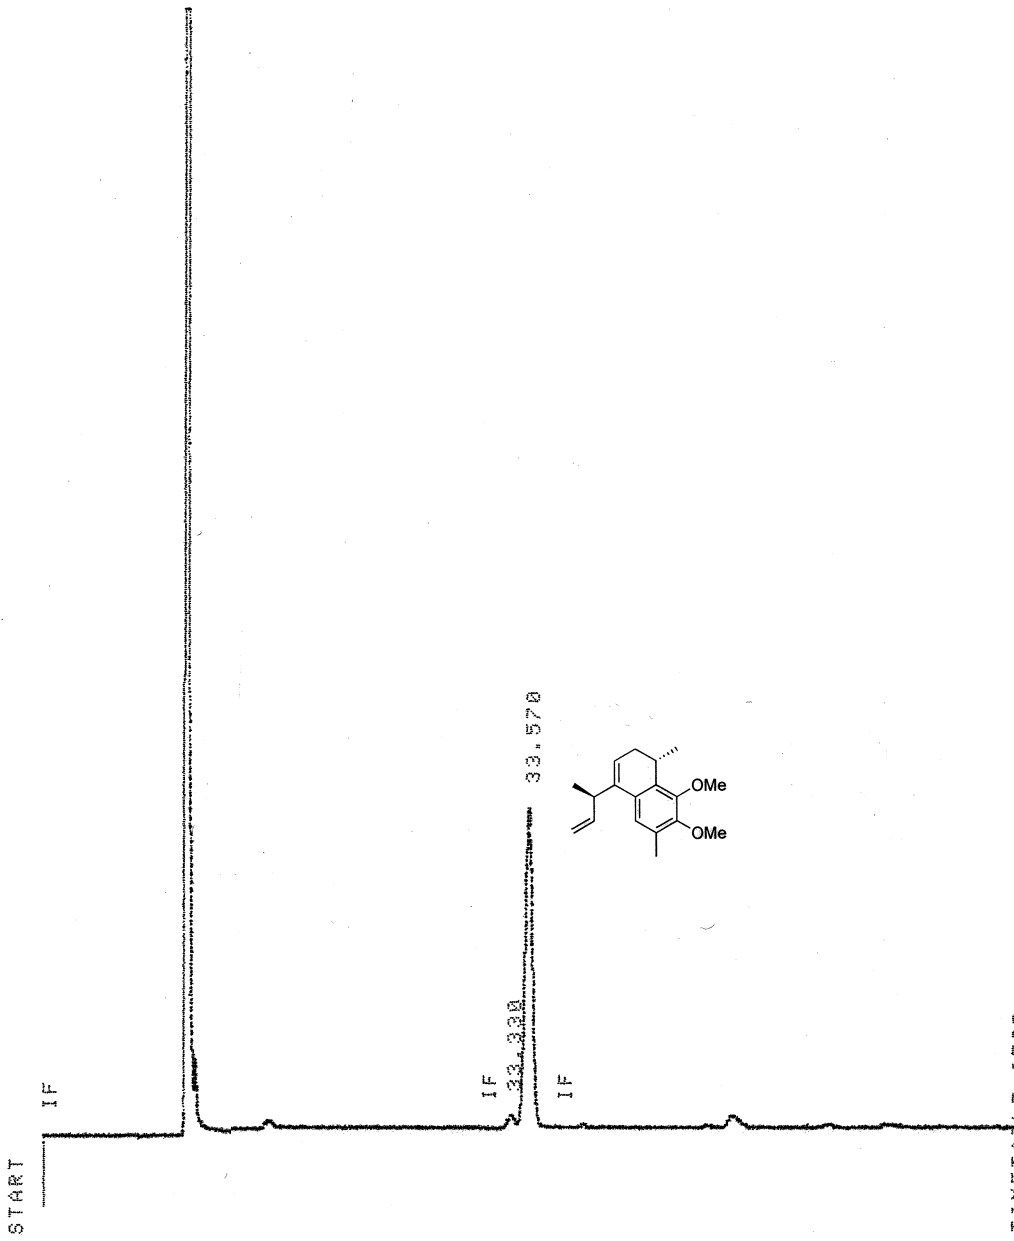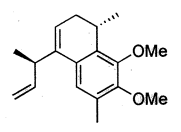

TIMETABLE STOP

Closing signal file N:SIGNAL .BNC

RUN# 220 MAR 26, 1901 14:34:42

SIGNAL FILE: N:SIGNAL.BNC  
 AREA#

| RT     | AREA  | TYPE | WIDTH | AREA%    |
|--------|-------|------|-------|----------|
| 33.330 | 2339  | PV   | .120  | 3.53430  |
| 33.570 | 63841 | VV   | .117  | 96.46570 |

TOTAL AREA= 66180  
 MUL FACTOR=1.0000E+00

7.260

6.940

5.698  
5.682

3.884  
3.832  
3.688  
3.675  
3.660  
3.285  
3.268  
3.251  
2.975  
2.959  
2.942  
2.925  
2.454  
2.437  
2.412  
2.396  
2.250  
2.197  
2.180  
2.155  
2.138  
1.893  
1.876  
1.859  
1.842  
1.702  
1.686  
1.669  
1.652  
1.256  
1.232  
1.215  
1.191  
1.139  
1.122  
1.056  
1.038

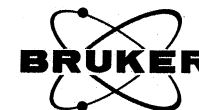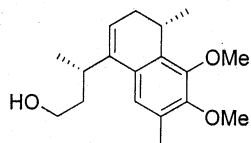

Current Data Parameters  
NAME 8-265  
EXPNO 9  
PROCNO 1

F2 - Acquisition Parameters  
Date\_ 20071015  
Time 12.49  
INSTRUM spect  
PROBHD 5 mm QNP 1H/13  
PULPROG zg30  
TD 65536  
SOLVENT CDCl3  
NS 16  
DS 2  
SWH 8278.146 Hz  
FIDRES 0.126314 Hz  
AQ 3.9584243 sec  
RG 128  
DW 60.400 usec  
DE 6.00 usec  
TE 0.0 K  
D1 1.00000000 sec  
MCREST 0.00000000 sec  
MCWRK 0.01500000 sec

===== CHANNEL f1 =====  
NUC1 1H  
P1 13.00 usec  
PL1 0.00 dB  
SFO1 400.1324710 MHz

F2 - Processing parameters  
SI 32768  
SF 400.1300101 MHz  
WDW EM  
SSB 0  
LB 0.30 Hz  
GB 0  
PC 1.00

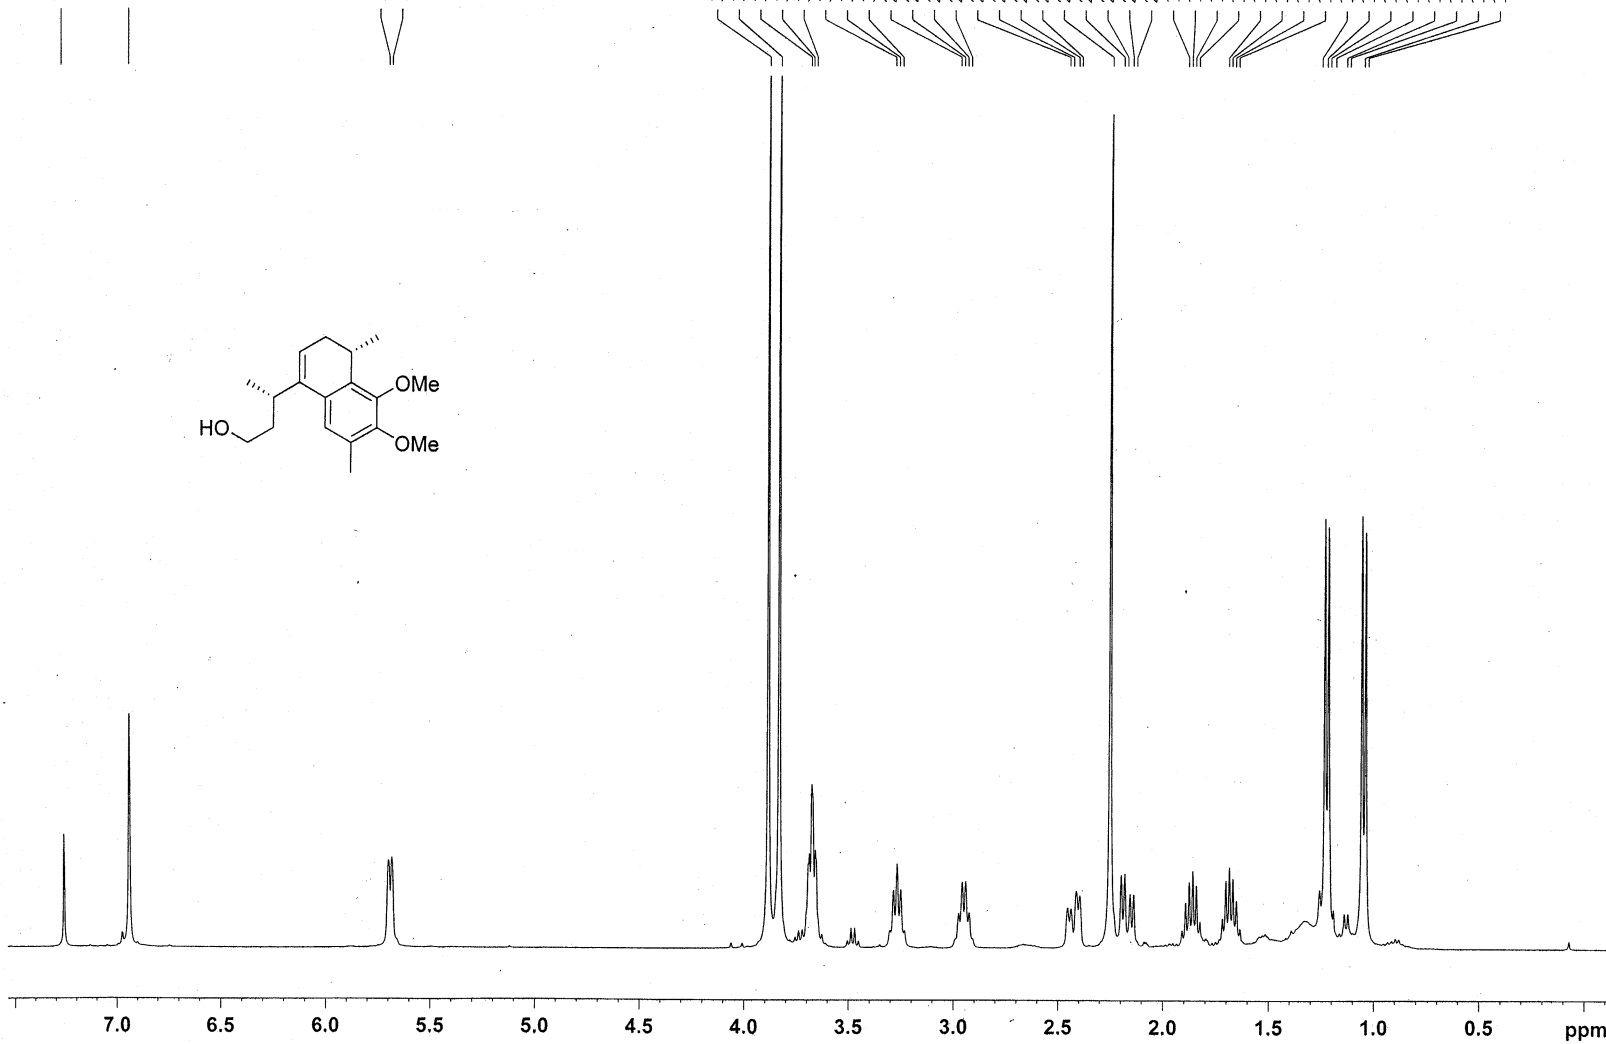

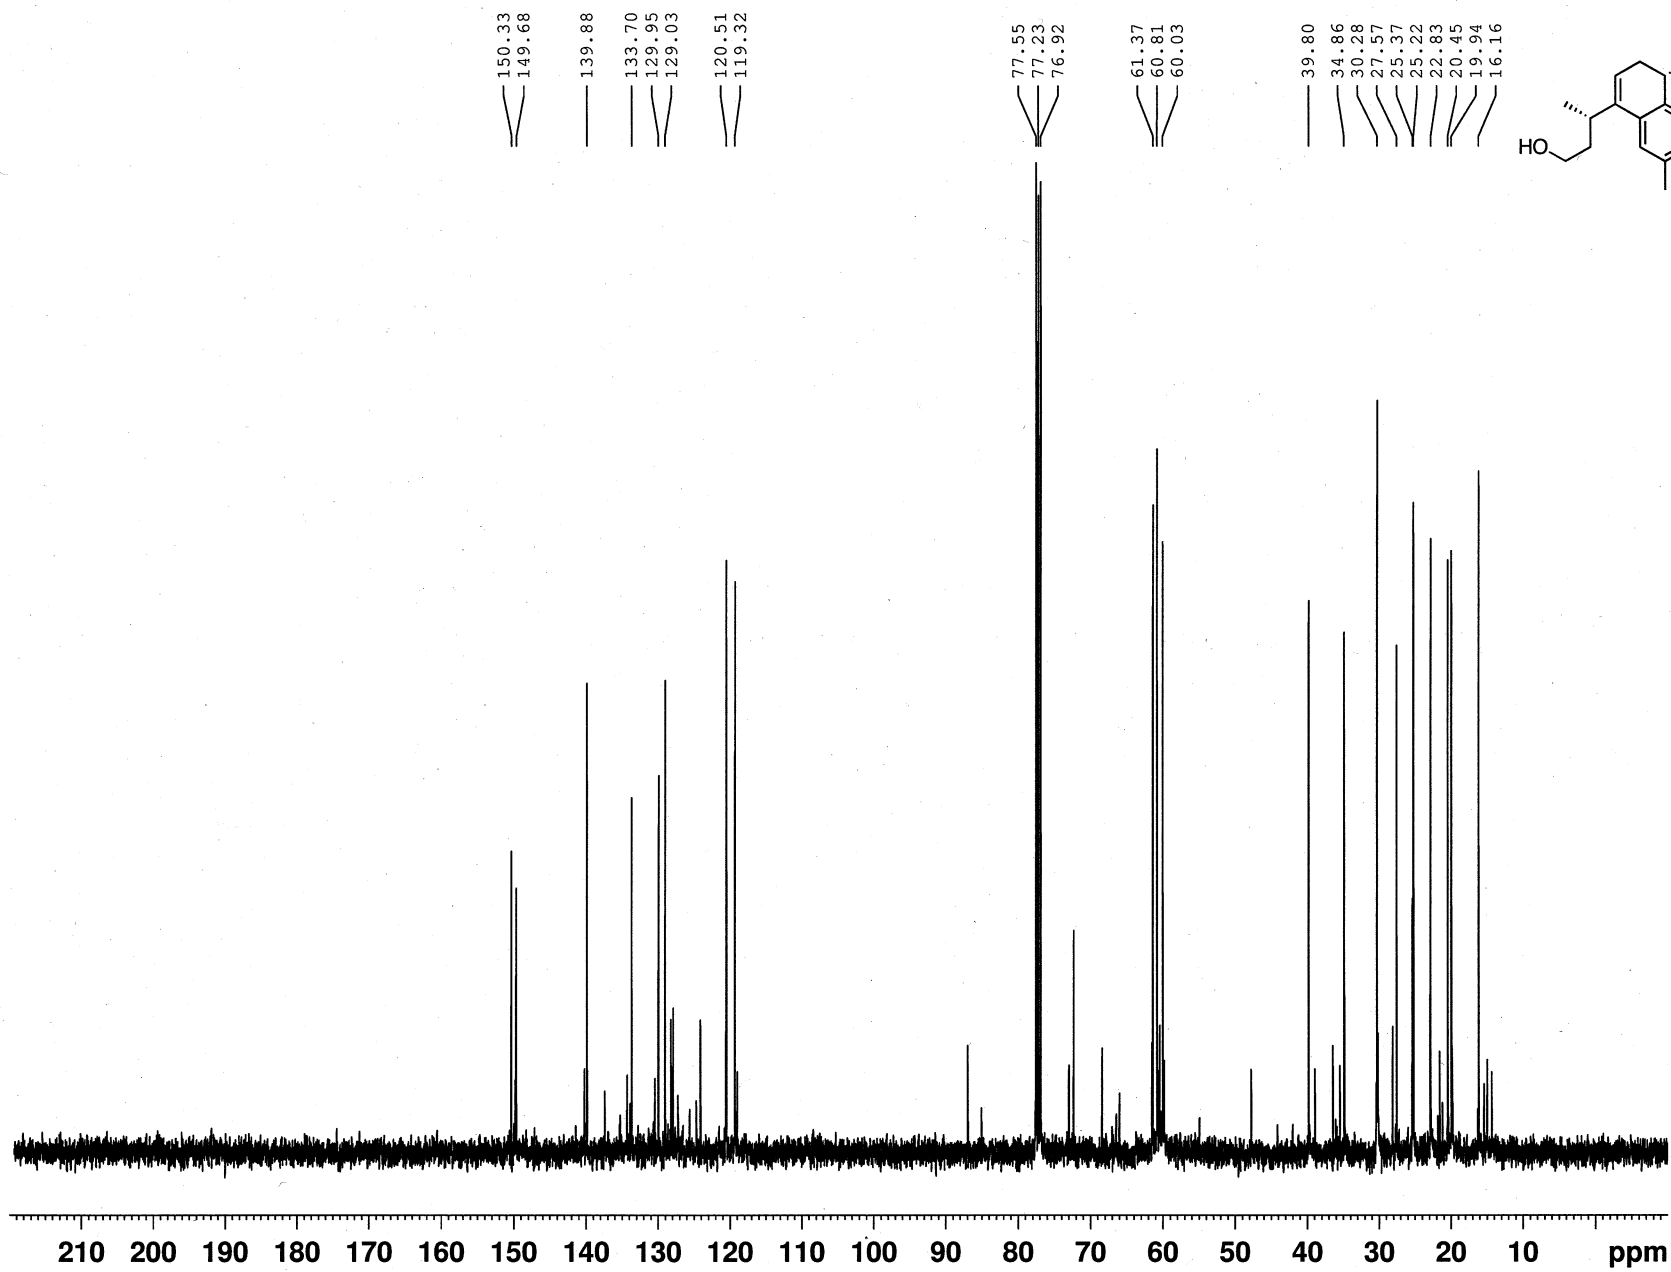

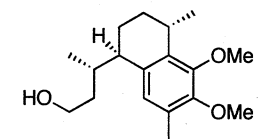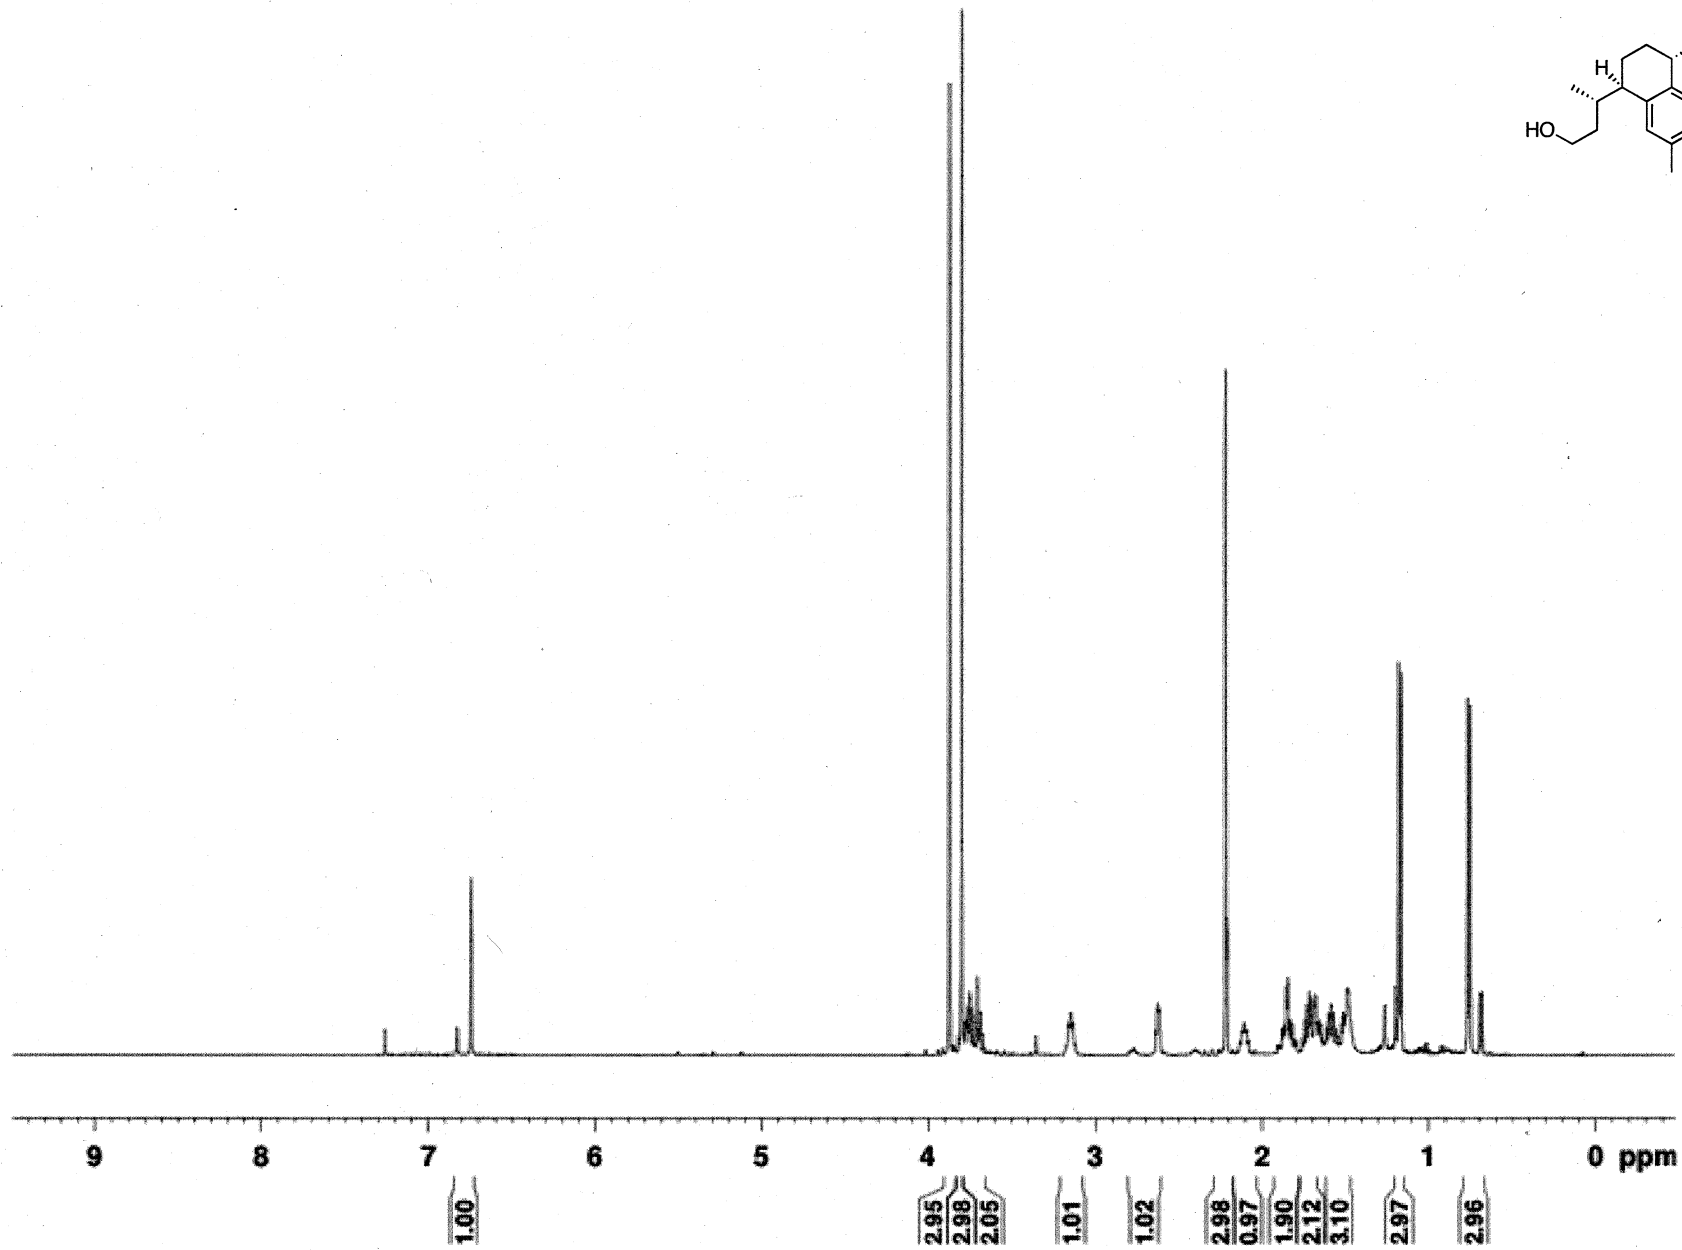

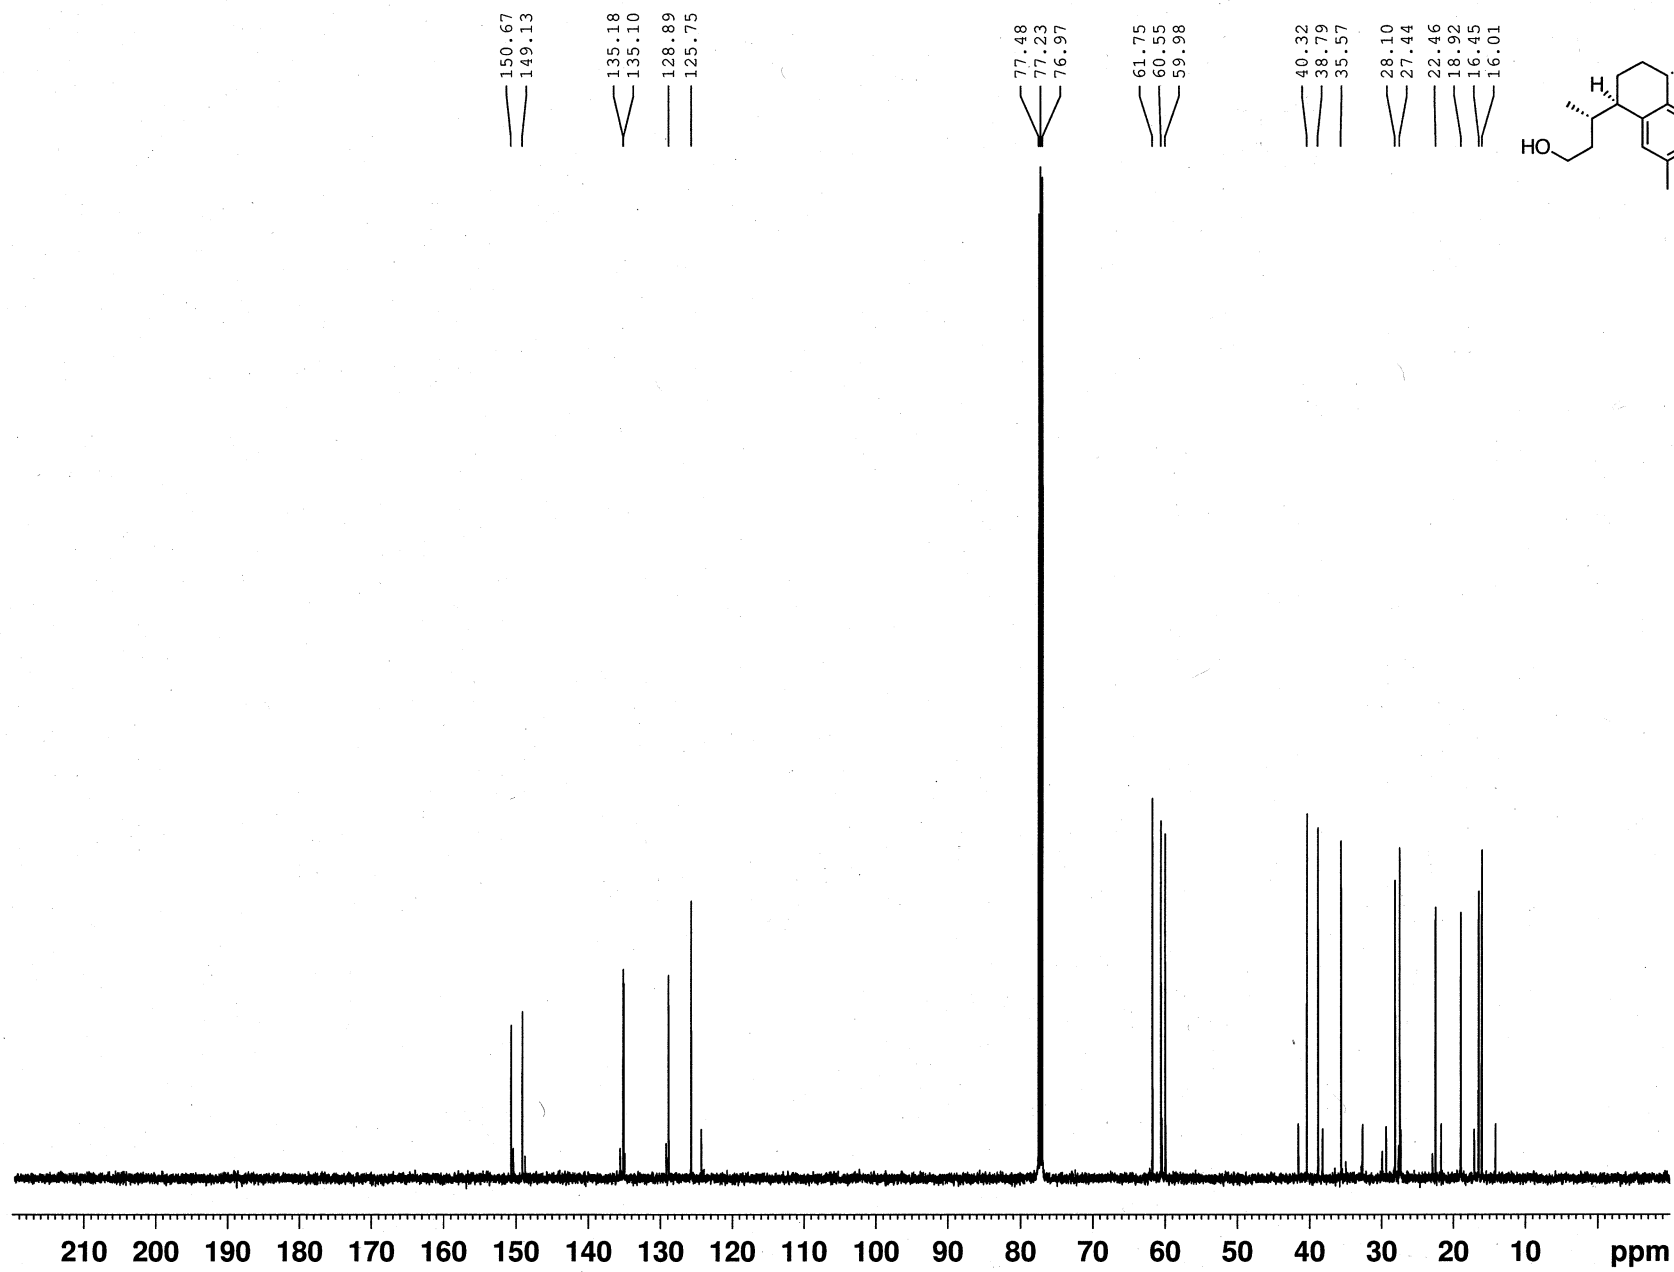





7.260

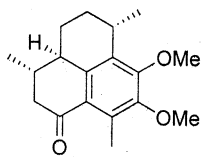

3.948  
3.919  
3.746  
3.236  
3.221  
2.640  
2.632  
2.606  
2.598  
2.521  
2.501  
2.350  
2.323  
2.317  
2.290  
2.283  
2.178  
2.170  
2.153  
2.150  
2.146  
2.142  
2.137  
2.129  
1.798  
1.784  
1.771  
1.659  
1.409  
1.402  
1.394  
1.384  
1.231  
1.218  
1.123  
1.110  
1.096  
1.089

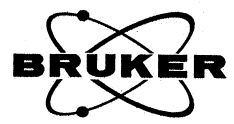

Current Data Parameters  
 NAME 8-283  
 EXPNO 1  
 PROCNO 1

F2 - Acquisition Parameters  
 Date\_ 20071022  
 Time 12.42  
 INSTRUM spect  
 PROBHD 5 mm TXI 13C Z  
 PULPROG zg30  
 TD 65536  
 SOLVENT CDCl3  
 NS 16  
 DS 2  
 SWH 10330.578 Hz  
 FIDRES 0.157632 Hz  
 AQ 3.1719923 sec  
 RG 1024  
 DW 48.400 usec  
 DE 6.00 usec  
 TE 295.2 K  
 D1 1.00000000 sec  
 MCREST 0.00000000 sec  
 MCWRK 0.01500000 sec

===== CHANNEL f1 =====  
 NUC1 1H  
 P1 9.70 usec  
 PL1 0.00 dB  
 SFO1 500.0230878 MHz

F2 - Processing parameters  
 SI 32768  
 SF 500.0200110 MHz  
 WDW EM  
 SSB 0  
 LB 0.30 Hz  
 GB 0  
 PC 1.00

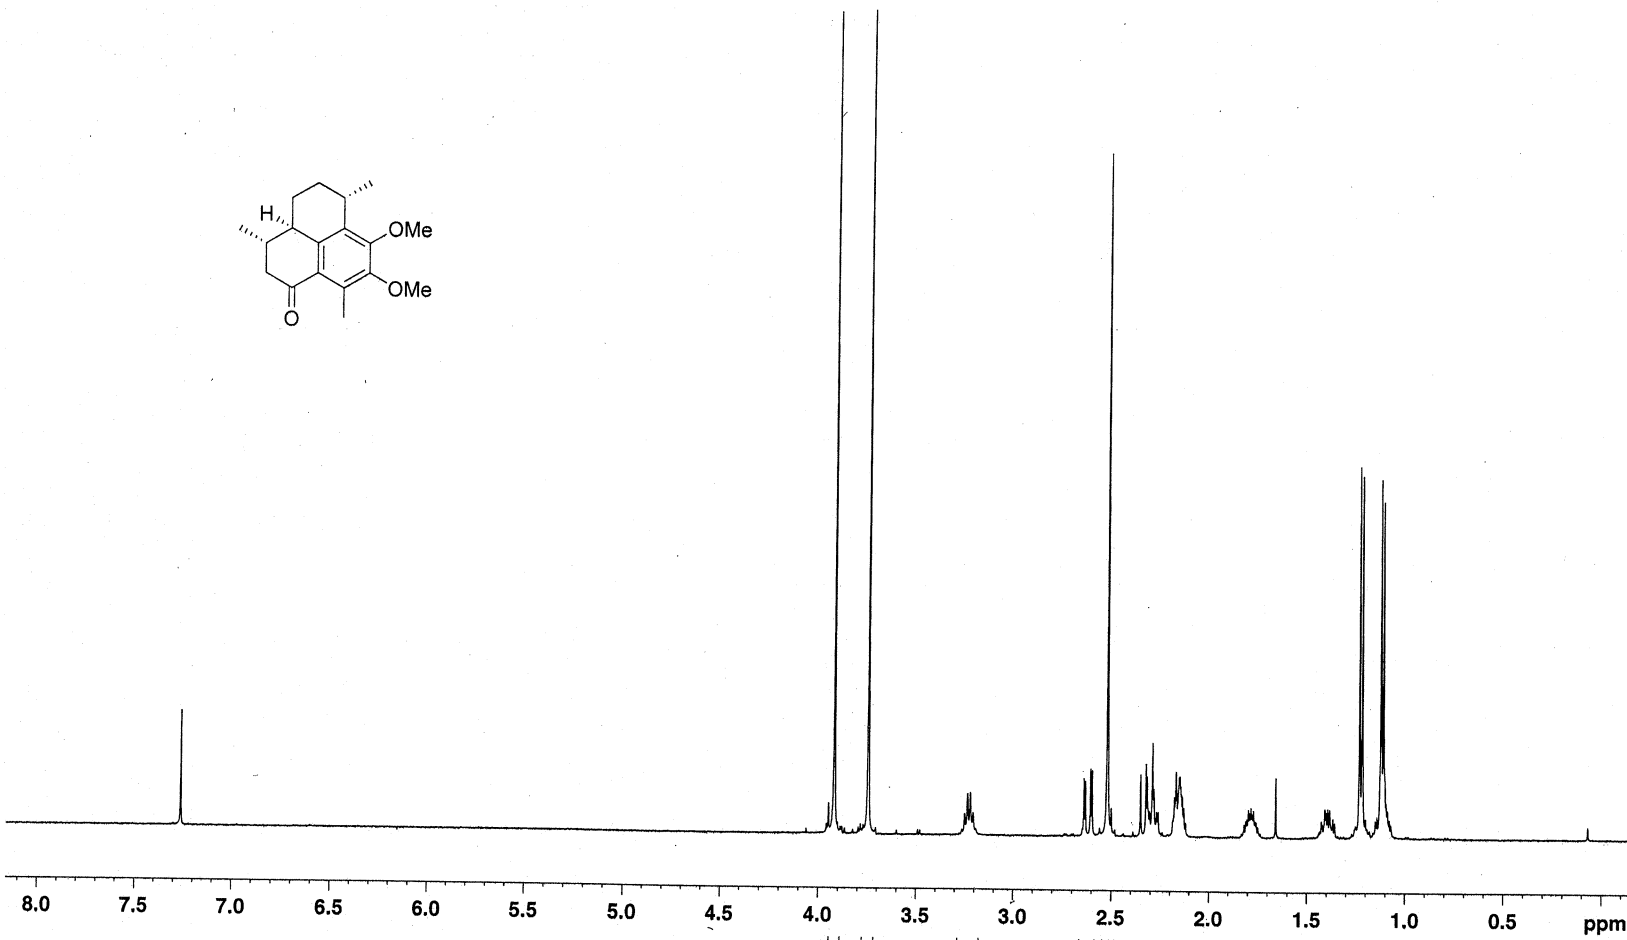

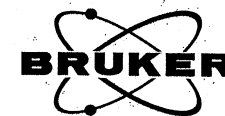

Current Data Parameters  
NAME Tricyclic Ketone  
EXPNO 2  
PROCNO 1

F2 - Acquisition Parameters  
Date\_ 20070815  
Time 9.47  
INSTRUM spect  
PROBHD 5 mm Multinucl  
PULPROG zgpg30  
TD 65536  
SOLVENT CDCl3  
NS 4  
DS 157  
SWH 30030.029 Hz  
FIDRES 0.458222 Hz  
AQ 1.0912244 sec  
RG 3649.1  
DW 16.650 usec  
DE 6.00 usec  
TE 300.2 K  
D1 2.00000000 sec  
d11 0.03000000 sec  
DELTA 1.89999998 sec  
MCREST 0.00000000 sec  
MCWRK 0.01500000 sec

=====  
CHANNEL f1  
NUC1 13C  
P1 13.00 usec  
PL1 3.00 dB  
SFO1 125.7427020 MHz

=====  
CHANNEL f2  
CPDPRG2 waltz16  
NUC2 1H  
PCPD2 100.00 usec  
PL2 -1.00 dB  
PL12 18.80 dB  
PL13 22.50 dB  
SFO2 500.0220001 MHz

F2 - Processing parameters  
SI 32768  
SF 125.7301322 MHz  
WDW EM  
SSB 0  
LB 1.00 Hz  
GB 0  
PC 1.00

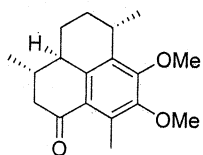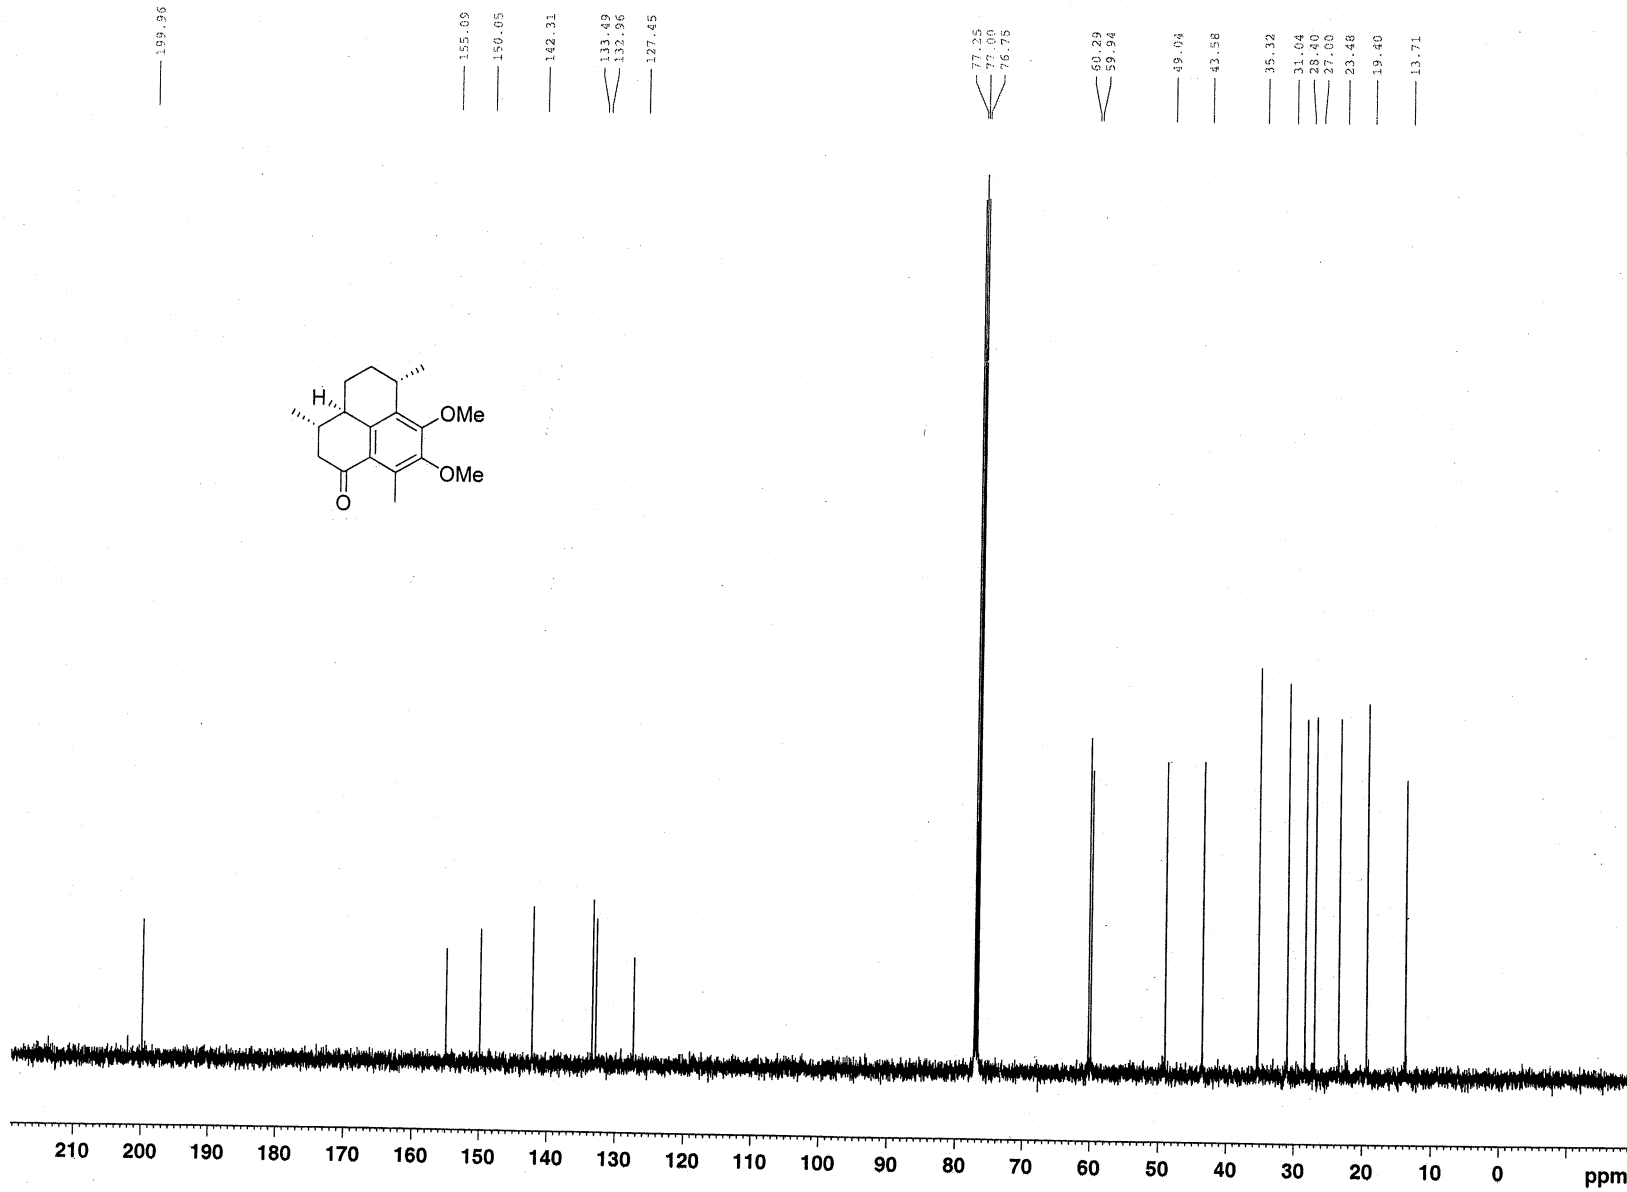

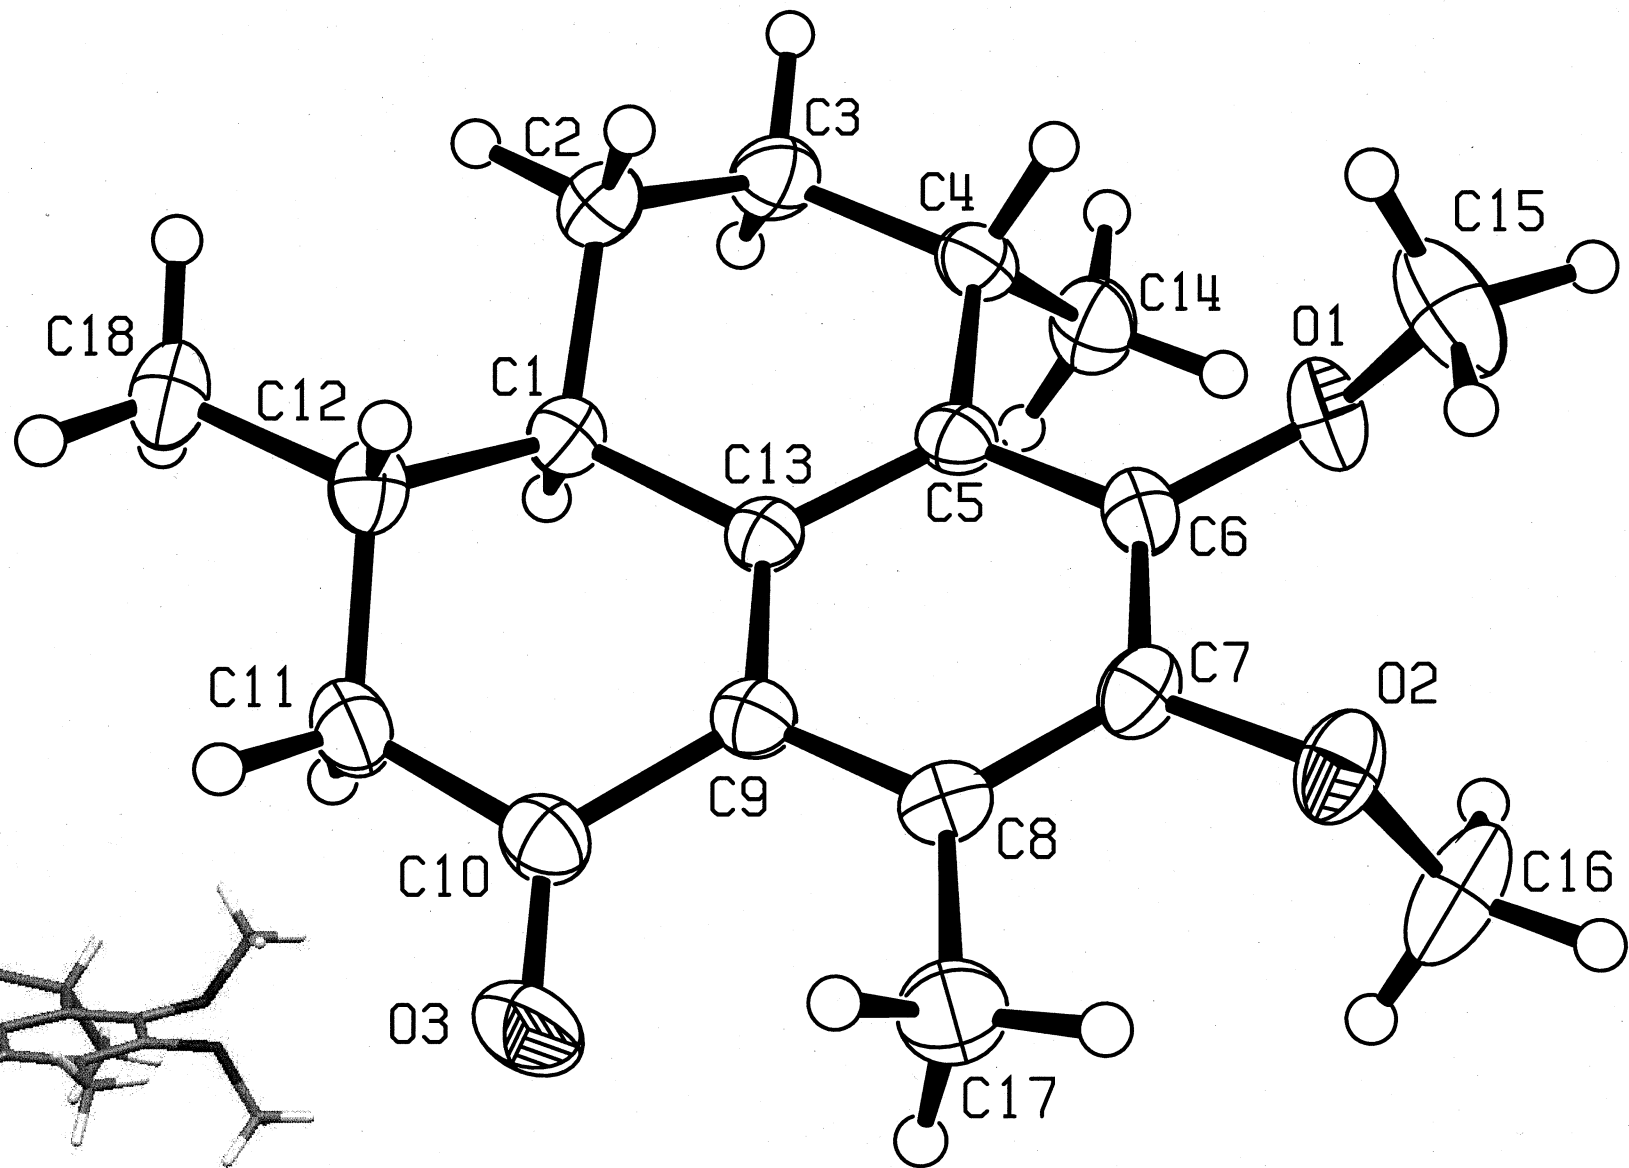

ORTEP diagram and Conformation of the Ketone 16

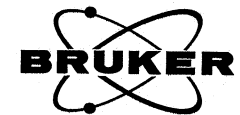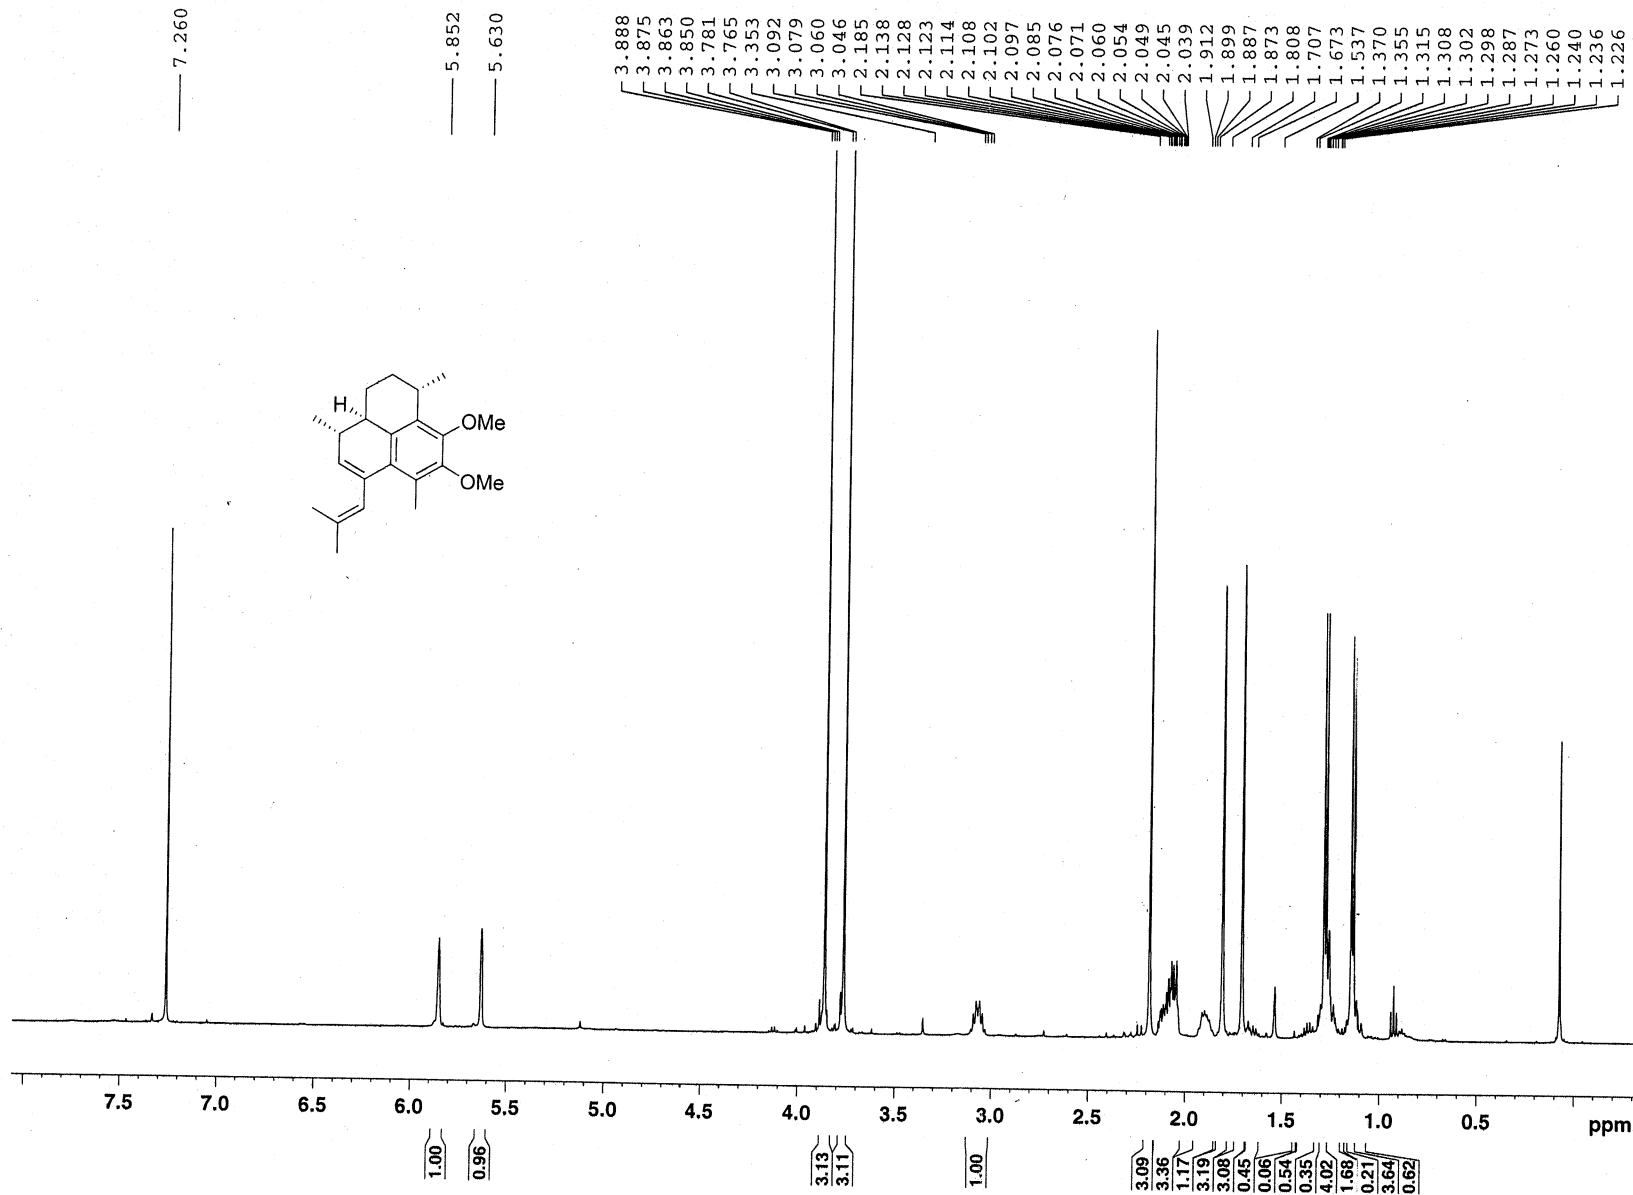

Current Data Parameters  
NAME 8-285  
EXPNO 1  
PROCNO 1

F2 - Acquisition Parameters  
Date\_ 20071024  
Time 2.37  
INSTRUM spect  
PROBHD 5 mm TXI 13C Z  
PULPROG zg30  
TD 65536  
SOLVENT CDCl3  
NS 16  
DS 2  
SWH 10330.578 Hz  
FIDRES 0.157632 Hz  
AQ 3.1719923 sec  
RG 181  
DW 48.400 usec  
DE 6.00 usec  
TE 300.2 K  
D1 1.0000000 sec  
MCREST 0.0000000 sec  
MCWRK 0.0150000 sec

==== CHANNEL f1 =====  
NUC1 1H  
P1 9.70 usec  
PL1 0.00 dB  
SFO1 500.0230878 MHz

F2 - Processing parameters  
SI 32768  
SF 500.0200113 MHz  
WDW EM  
SSB 0  
LB 0.30 Hz  
GB 0  
PC 1.00

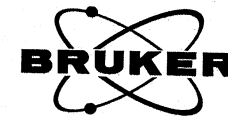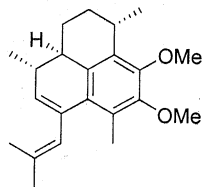

150.59  
149.88

135.83  
135.43  
133.71  
133.63  
131.89  
131.37  
127.43  
126.63

77.26  
77.00  
76.75

60.03  
59.82

43.06

34.32  
32.17  
29.68  
26.33  
26.01  
23.20  
19.53  
18.80  
14.06

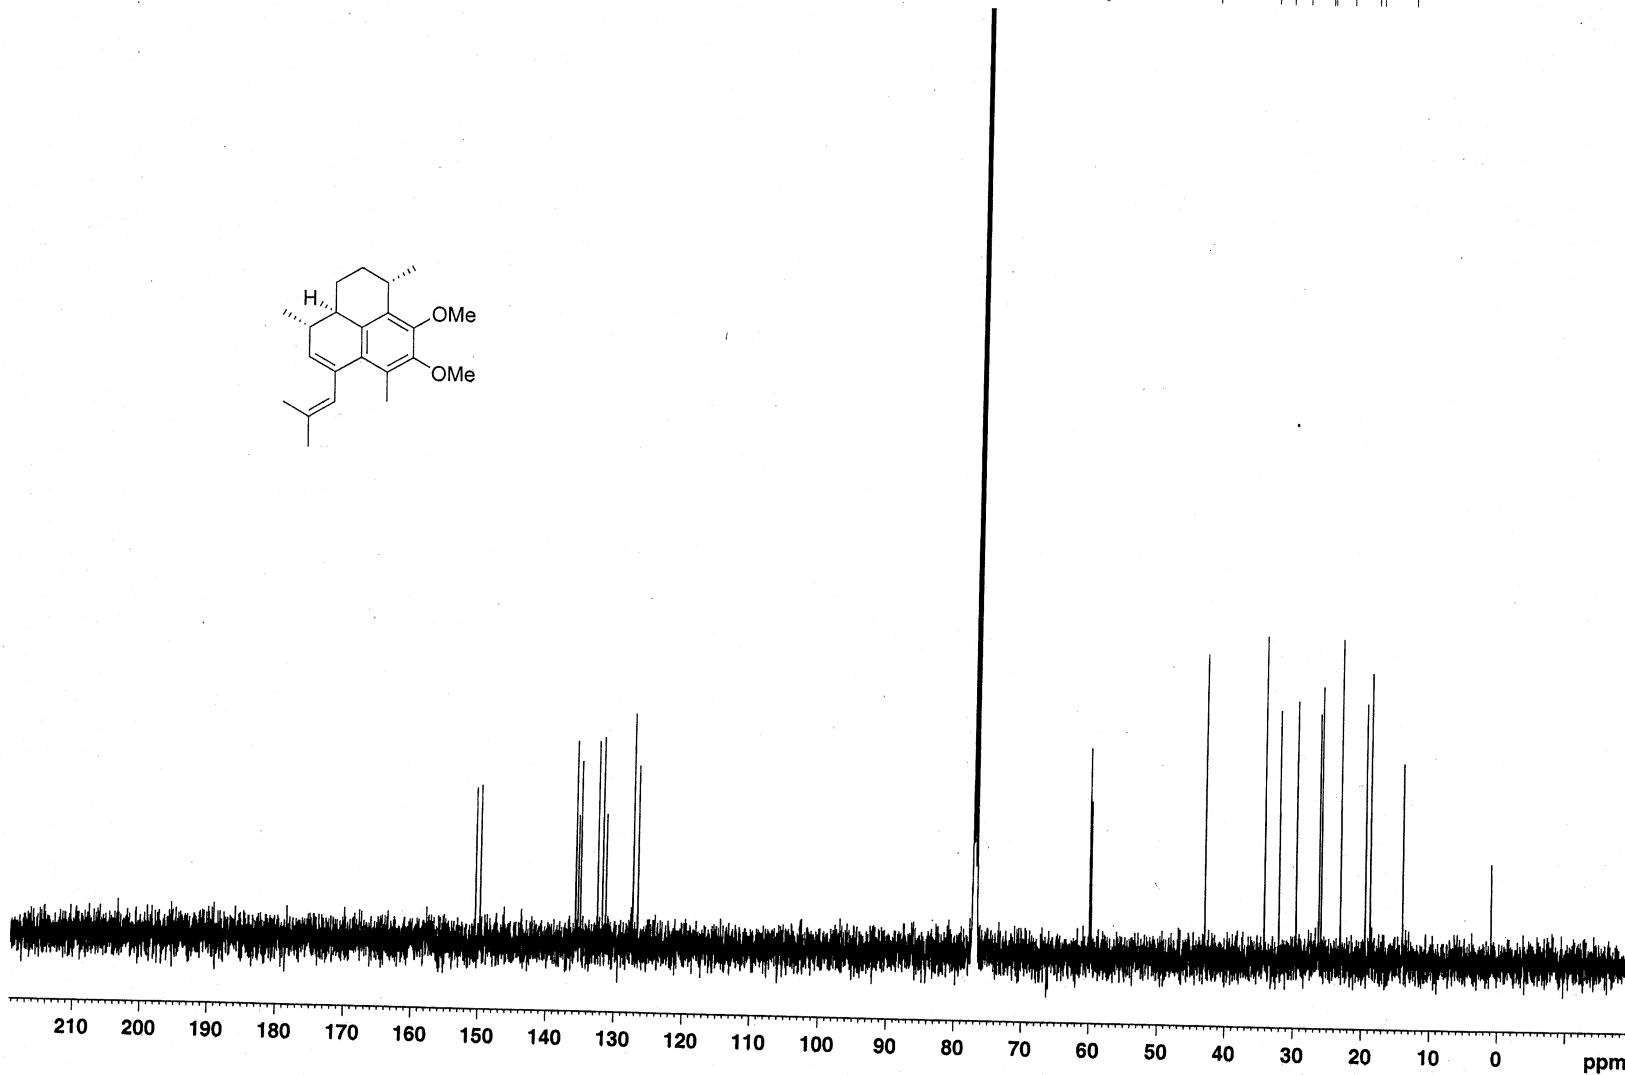

Current Data Parameters  
NAME 8-285  
EXPNO 2  
PROCNO 1

F2 - Acquisition Parameters  
Date\_ 20071024  
Time 2.44  
INSTRUM spect  
PROBHD 5 mm TXI 13C Z  
PULPROG zgpg30  
TD 65536  
SOLVENT CDCl3  
NS 8873  
DS 4  
SWH 30030.029 Hz  
FIDRES 0.458222 Hz  
AQ 1.0912244 sec  
RG 4096  
DW 16.650 usec  
DE 6.00 usec  
TE 300.2 K  
D1 2.0000000 sec  
d11 0.0300000 sec  
DELTA 1.8999999 sec  
MCREST 0.0000000 sec  
MCWRK 0.0150000 sec

==== CHANNEL f1 =====  
NUC1 13C  
P1 14.20 usec  
PL1 0.00 dB  
SFO1 125.7427020 MHz

==== CHANNEL f2 =====  
CPDPRG2 waltz16  
NUC2 1H  
PCPD2 100.00 usec  
PL2 -1.00 dB  
PL12 15.59 dB  
PL13 22.50 dB  
SFO2 500.0220001 MHz

F2 - Processing parameters  
SI 32768  
SF 125.7301285 MHz  
WDW EM  
SSB 0  
LB 1.00 Hz  
GB 0  
PC 1.40

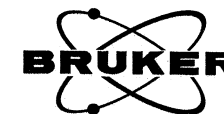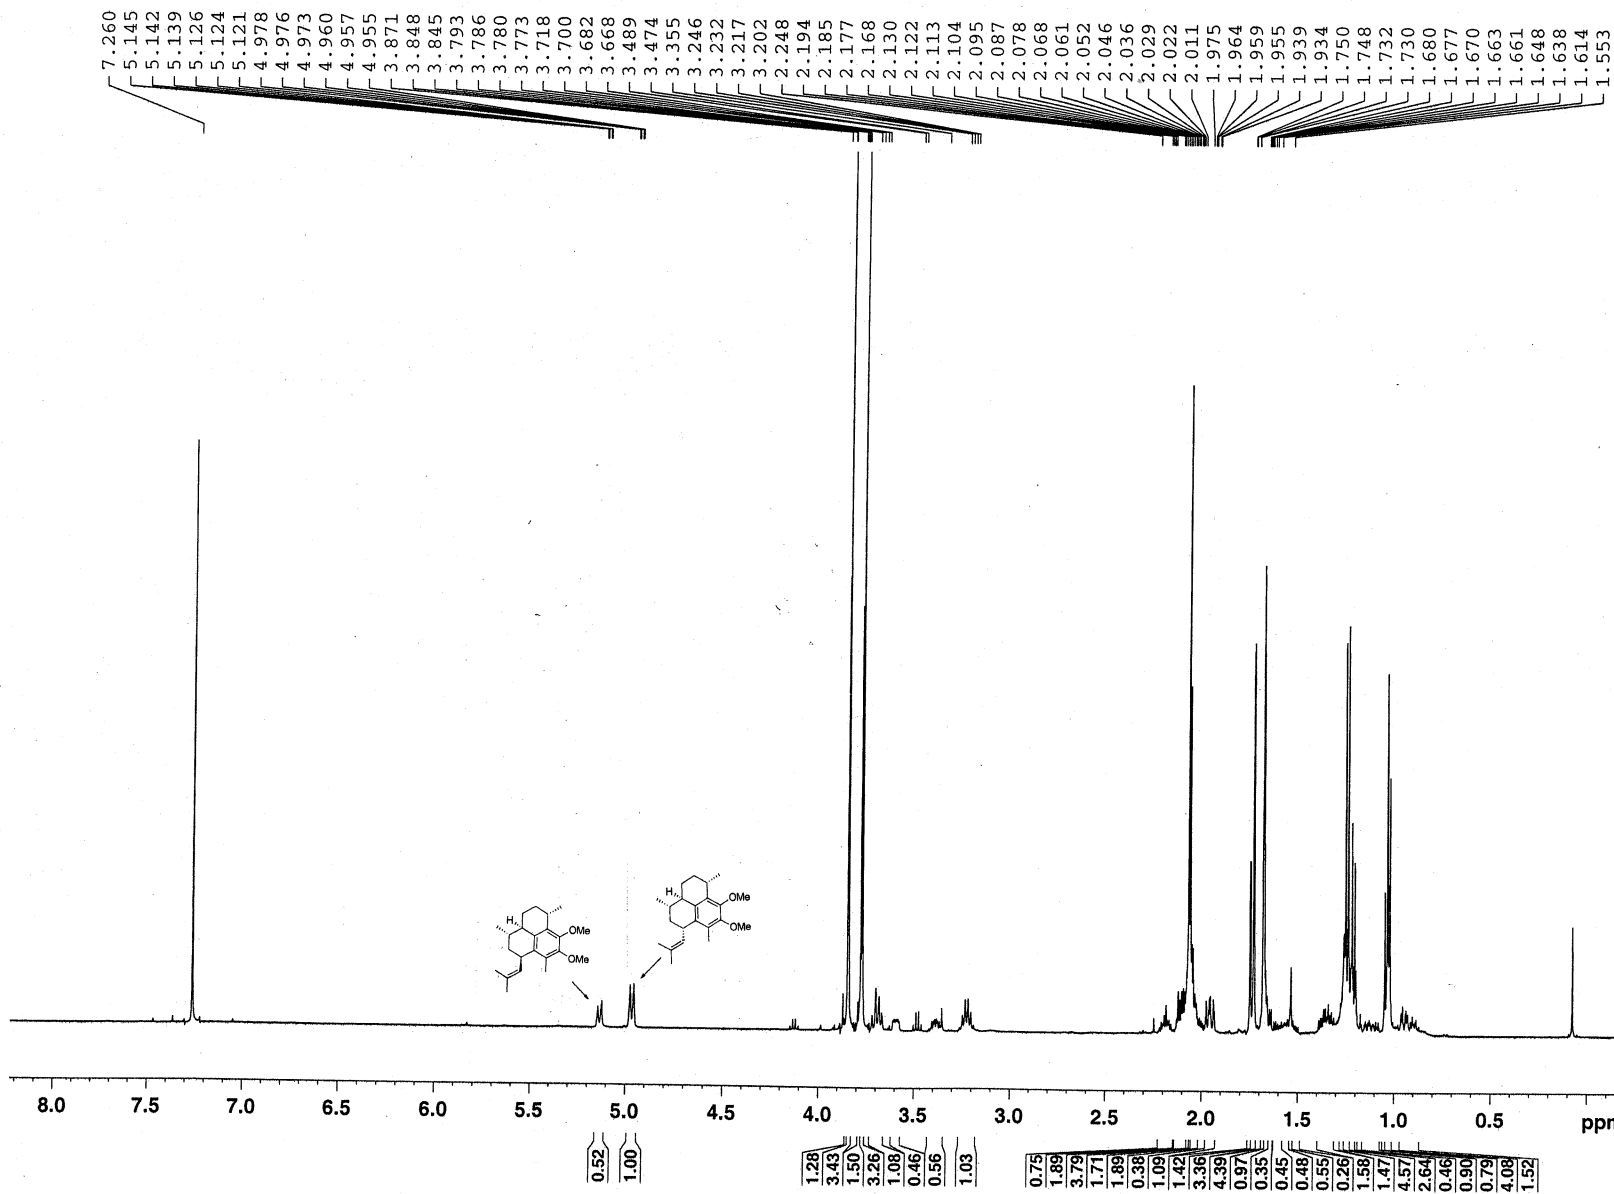

Current Data Parameters  
NAME 8-287  
EXPNO 2  
PROCNO 1

F2 - Acquisition Parameters  
Date\_ 20071024  
Time 23.55  
INSTRUM spect  
PROBHD 5 mm TXI 13C Z  
PULPROG zg30  
TD 65536  
SOLVENT CDCl3  
NS 16  
DS 2  
SWH 10330.578 Hz  
FIDRES 0.157632 Hz  
AQ 3.1719923 sec  
RG 161.3  
DW 48.400 usec  
DE 6.00 usec  
TE 300.2 K  
DI 1.00000000 sec  
MCREST 0.00000000 sec  
MCWRK 0.01500000 sec

===== CHANNEL f1 =====  
NUC1 1H  
P1 9.70 usec  
PLL 0.00 dB  
SFO1 500.0230878 MHz

F2 - Processing parameters  
SI 32768  
SF 500.0200110 MHz  
WDW EM  
SSB 0  
LB 0.30 Hz  
GB 0  
PC 1.00

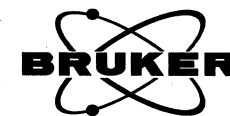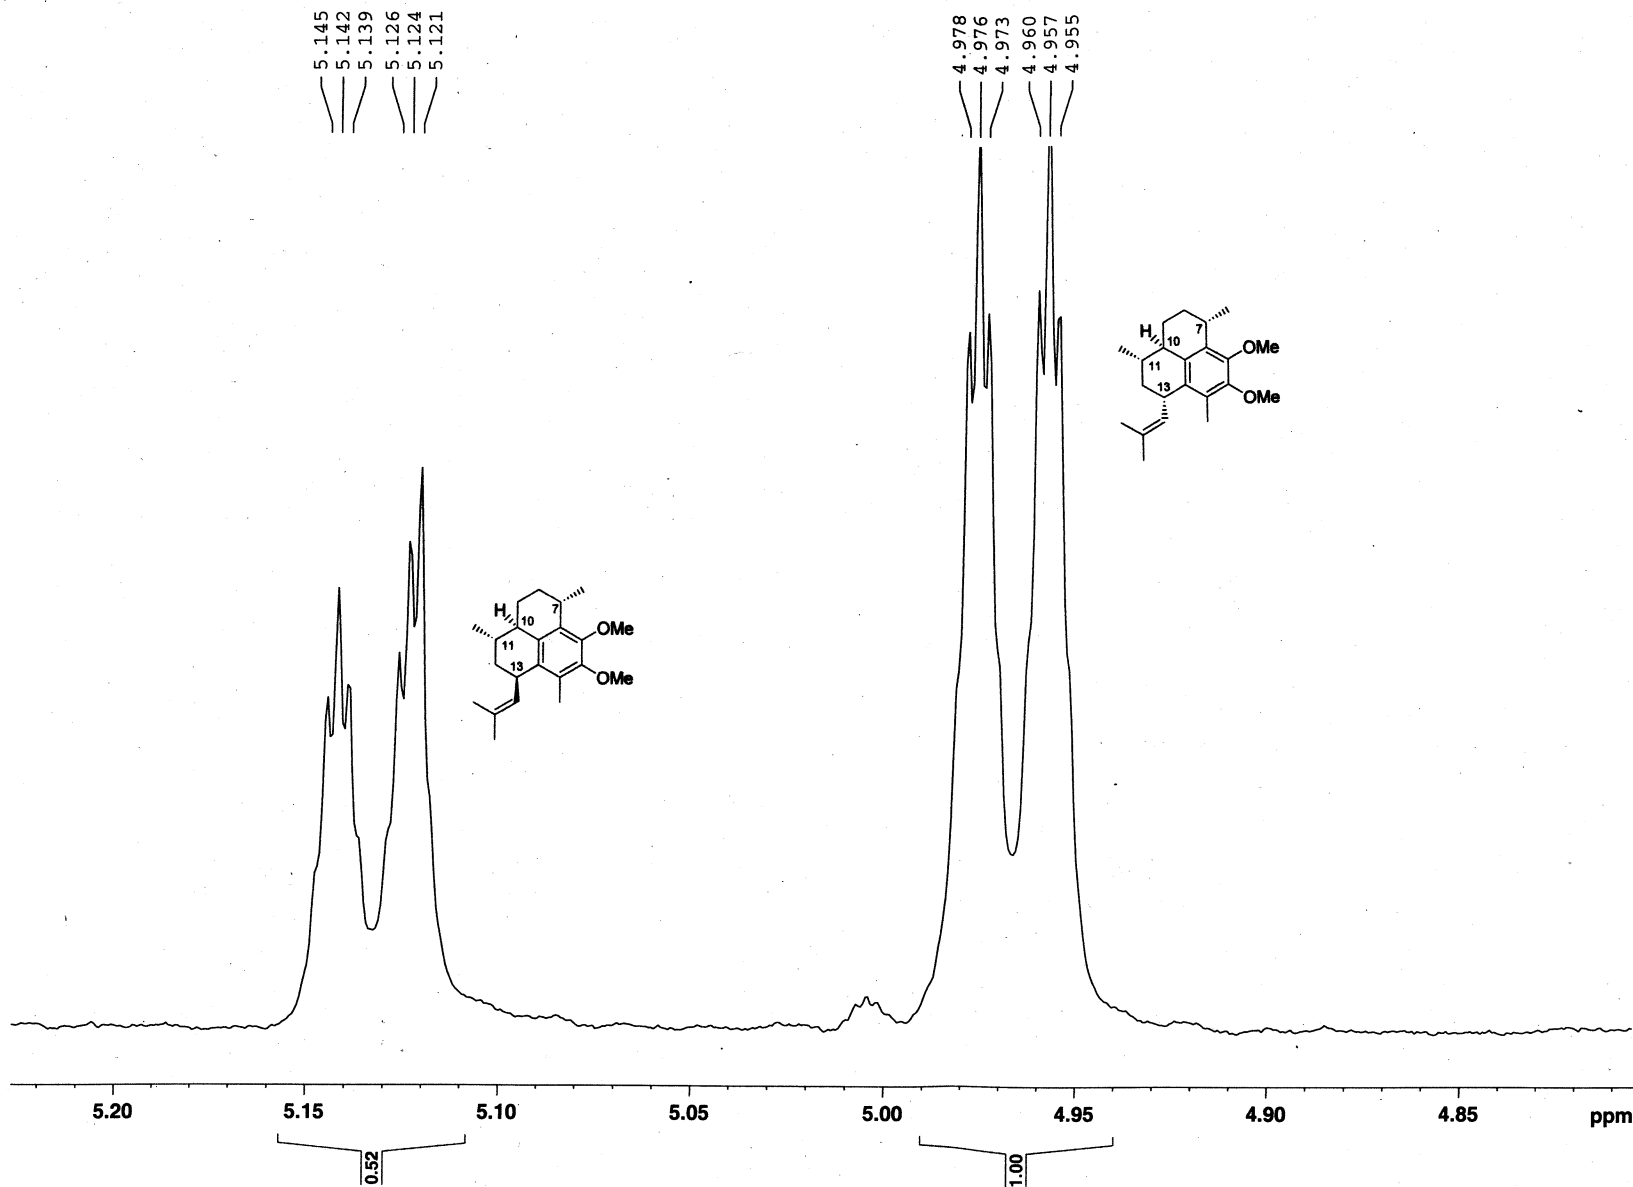

Current Data Parameters  
NAME 8-287  
EXPNO 2  
PROCNO 1

F2 - Acquisition Parameters  
Date\_ 20071024  
Time 23.55  
INSTRUM spect  
PROBHD 5 mm TXI 13C Z  
PULPROG zg30  
TD 65536  
SOLVENT CDCl3  
NS 16  
DS 2  
SWH 10330.578 Hz  
FIDRES 0.157632 Hz  
AQ 3.1719923 sec  
RG 161.3  
DW 48.400 usec  
DE 6.00 usec  
TE 300.2 K  
D1 1.00000000 sec  
MCREST 0.00000000 sec  
MCWRK 0.01500000 sec

===== CHANNEL f1 =====  
NUC1 1H  
P1 9.70 usec  
PL1 0.00 dB  
SFO1 500.0230878 MHz

F2 - Processing parameters  
SI 32768  
SF 500.0200110 MHz  
WDW EM  
SSB 0  
LB 0.30 Hz  
GB 0  
PC 1.00

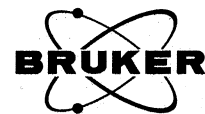

Current Data Parameters  
NAME 8-287  
EXPNO 3  
PROCNO 1

F2 - Acquisition Parameters  
Date 20071030  
Time 22.24  
INSTRUM spect  
PROBHD 5 mm QNP 1H/13  
PULPROG zgpg30  
TD 65536  
SOLVENT CDCl3  
NS 1024  
DS 4  
SWH 23980.814 Hz  
FIDRES 0.365918 Hz  
AQ 1.3664756 sec  
RG 8192  
DM 20.850 usec  
DE 6.00 usec  
TE 0.0 K  
D1 2.00000000 sec  
d11 0.03000000 sec  
DELTA 1.89999998 sec  
MCREST 0.00000000 sec  
MCWRK 0.01500000 sec

==== CHANNEL f1 =====  
NUC1 13C  
P1 10.50 usec  
PL1 0.00 dB  
SFO1 100.6228298 MHz

==== CHANNEL f2 =====  
CPDPRG2 waltz16  
NUC2 1H  
PCPD2 80.00 usec  
PL2 -6.00 dB  
PL12 14.56 dB  
PL13 16.50 dB  
SFO2 400.1316005 MHz

F2 - Processing parameters  
SI 32768  
SF 100.6127693 MHz  
WDW EM  
SSB 0  
LB 1.00 Hz  
GB 0  
PC 1.00

149.41  
149.06  
135.29  
134.03  
133.09  
130.94  
129.95  
129.67  
128.59  
128.39  
77.32  
77.20  
77.00  
76.68  
60.51  
60.18  
60.02  
59.86  
43.99  
42.12  
40.07  
39.39  
37.32  
35.67  
34.06  
33.31  
30.31  
29.70  
28.27  
27.65  
27.53  
27.05  
25.66  
25.42  
24.33  
23.46  
21.06  
20.06  
17.65  
17.53  
12.10  
10.82

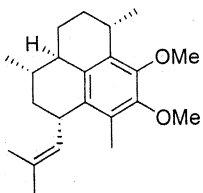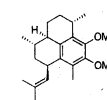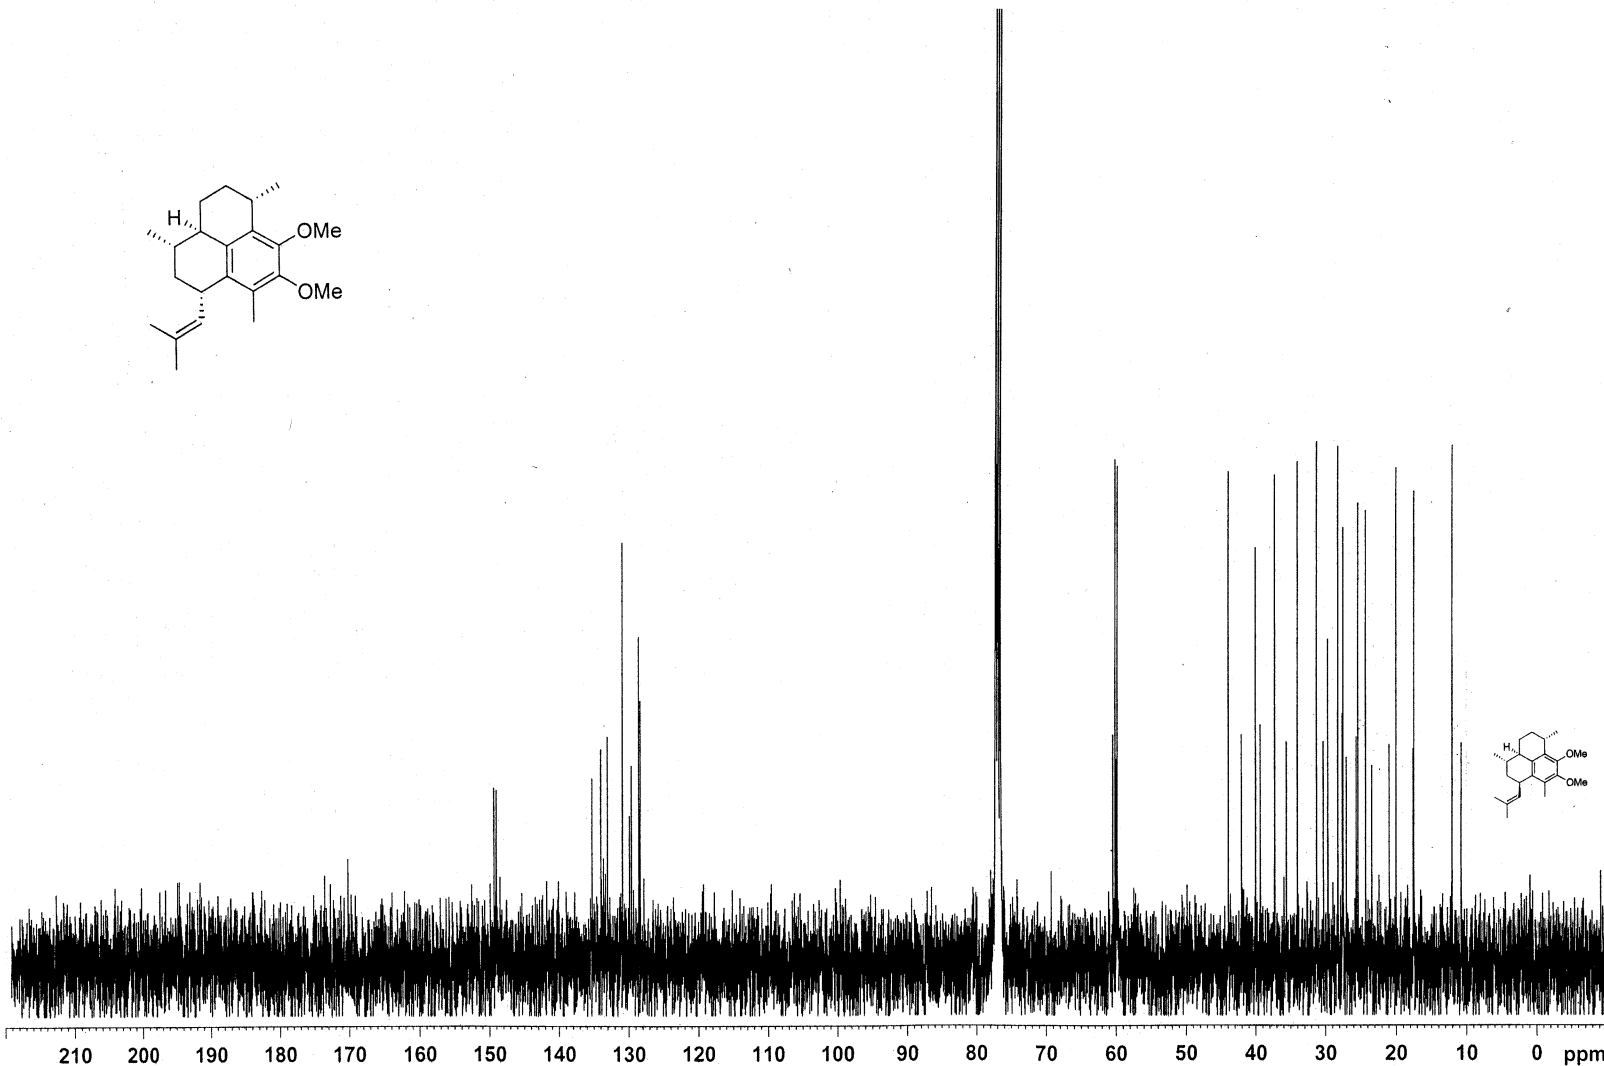



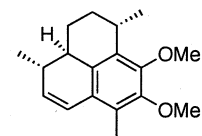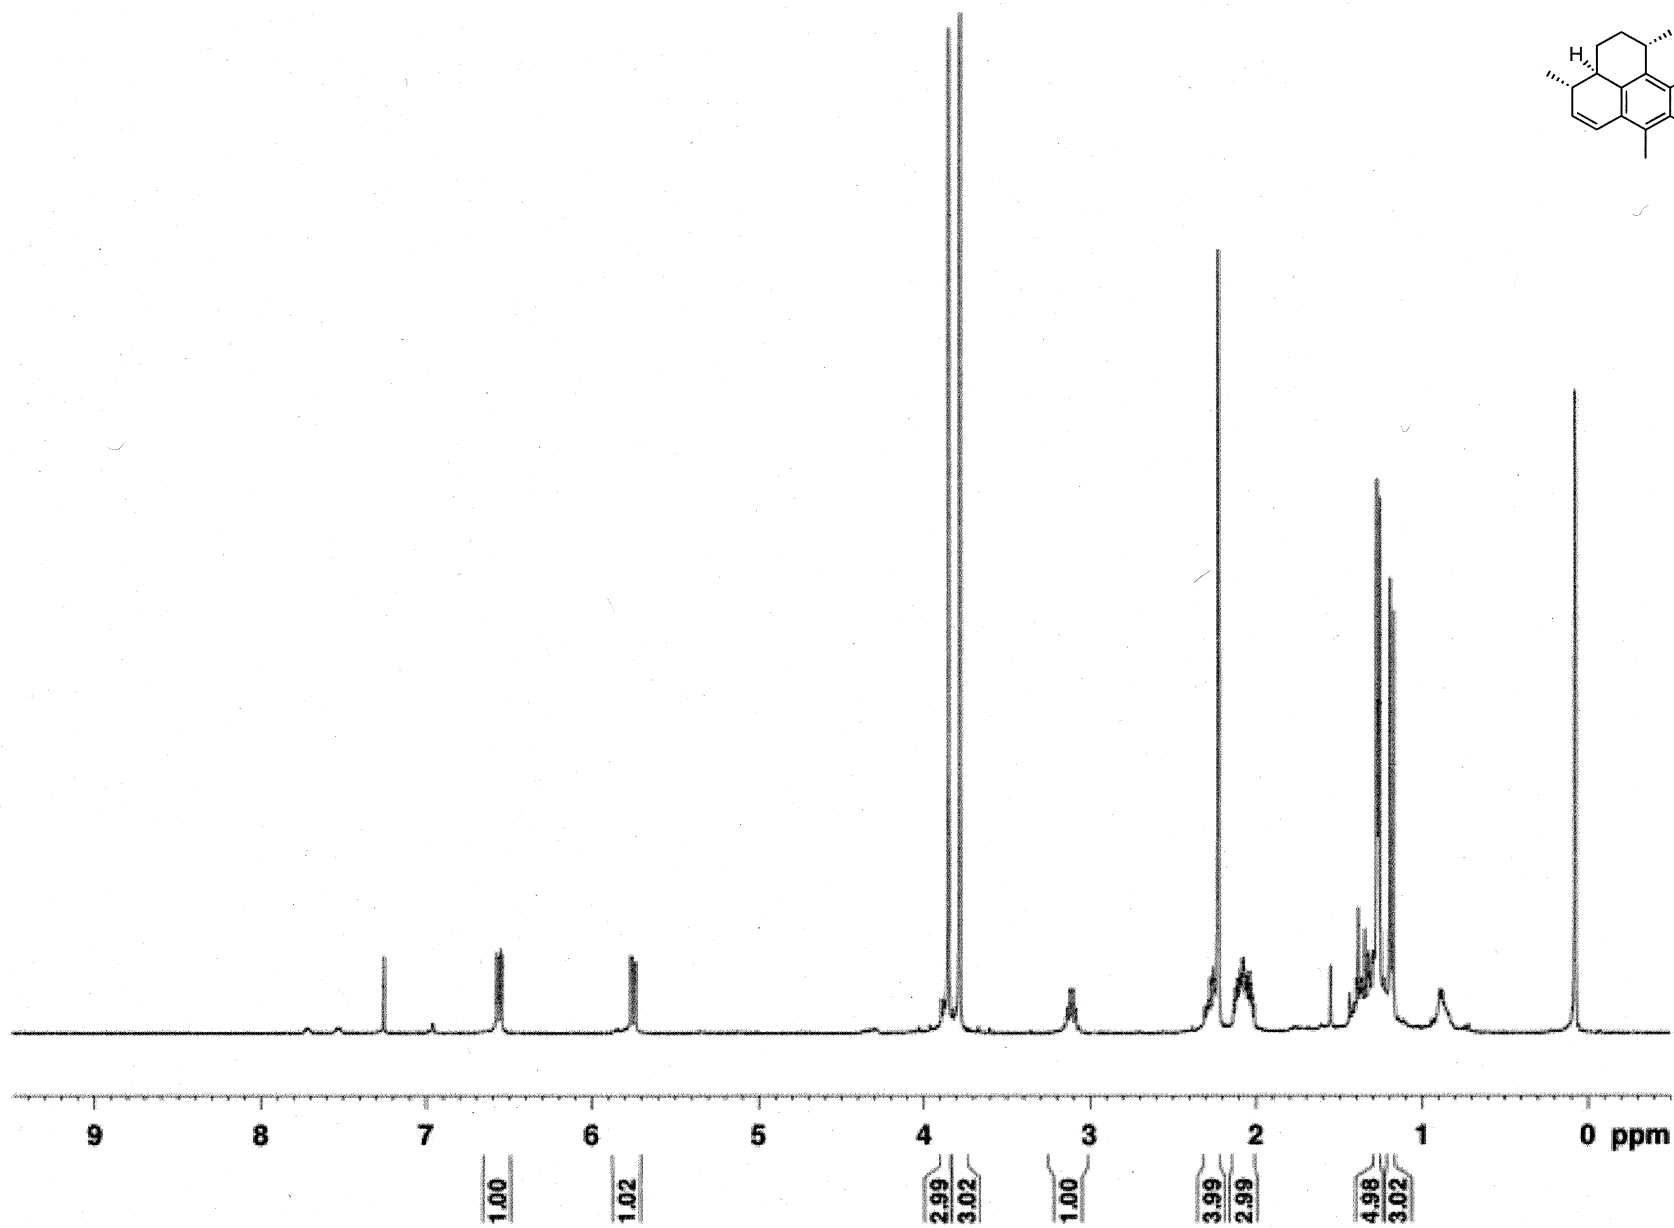

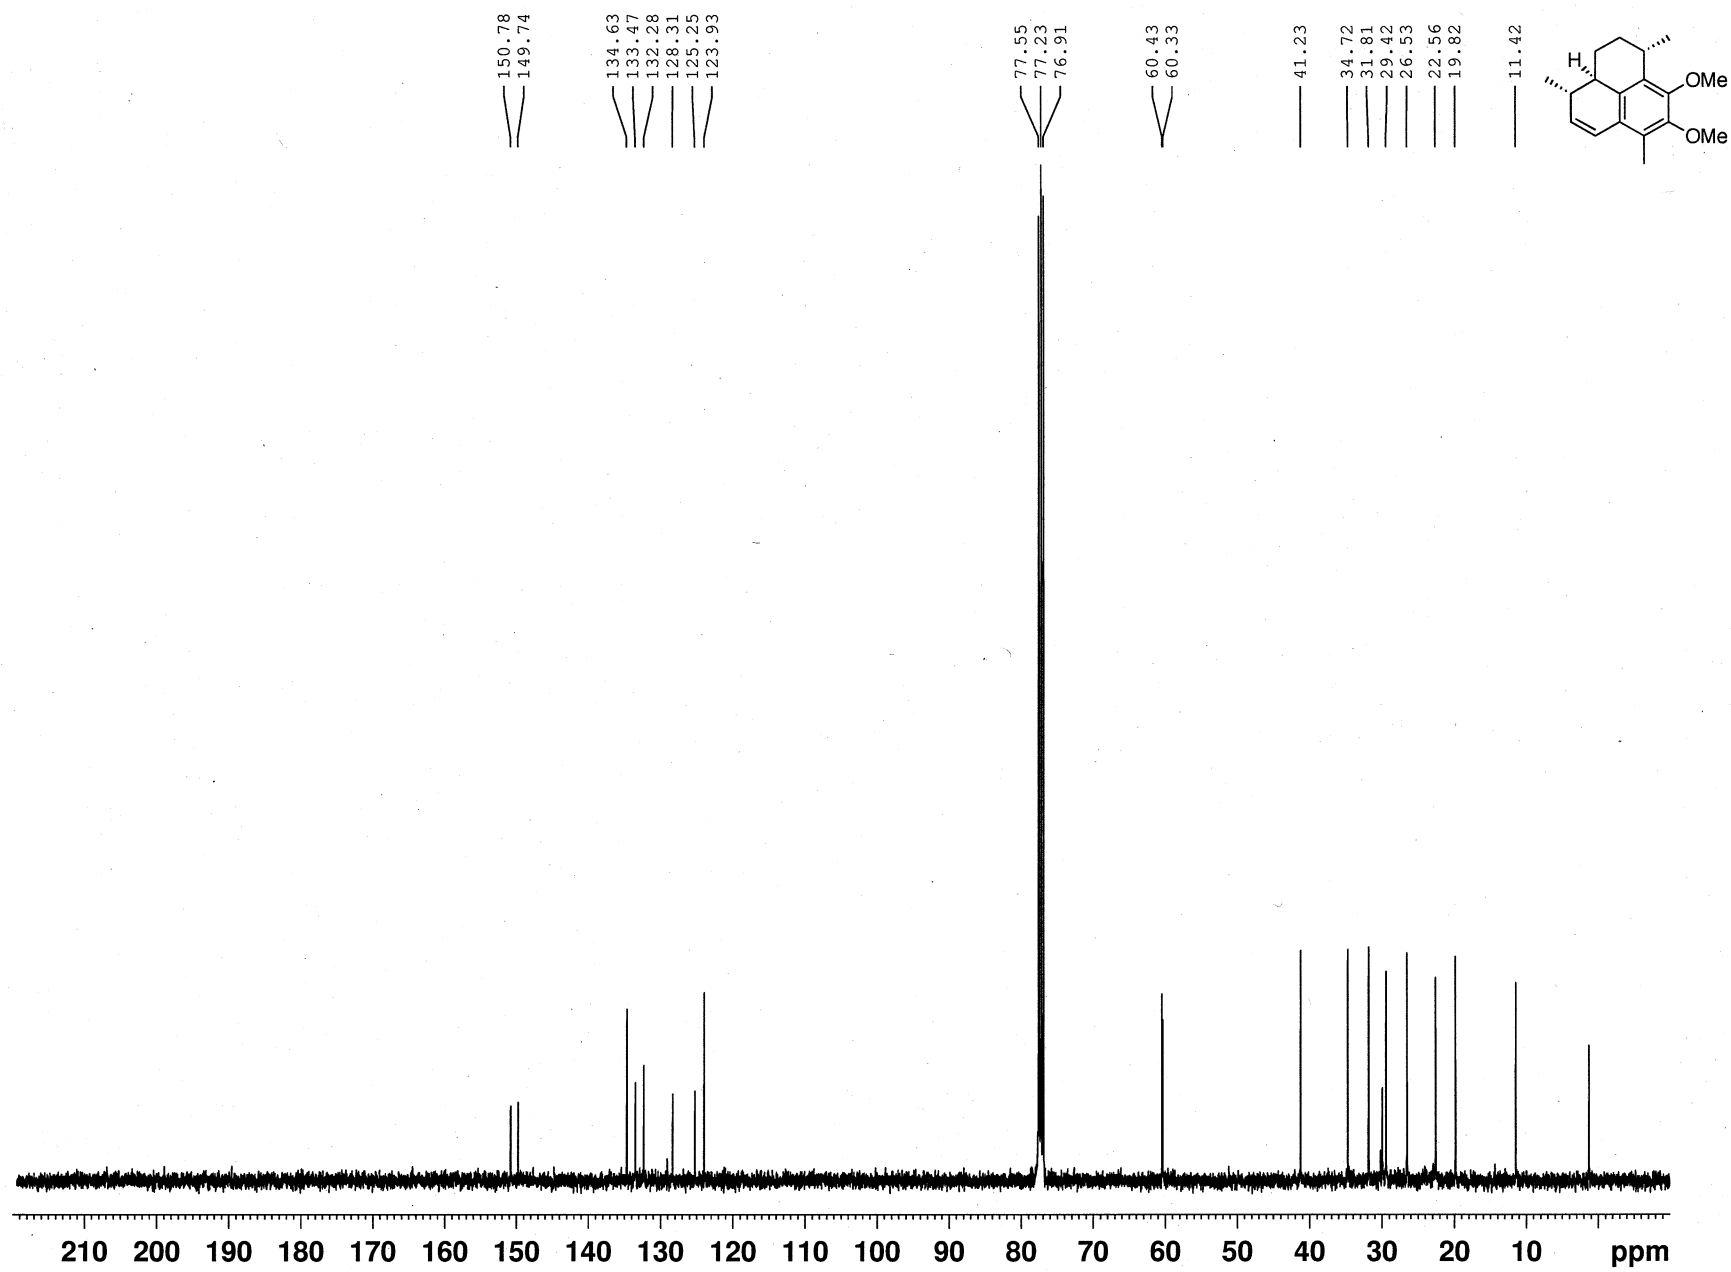

\* RUN # 276 FEB 27, 1901 13:22:07

START

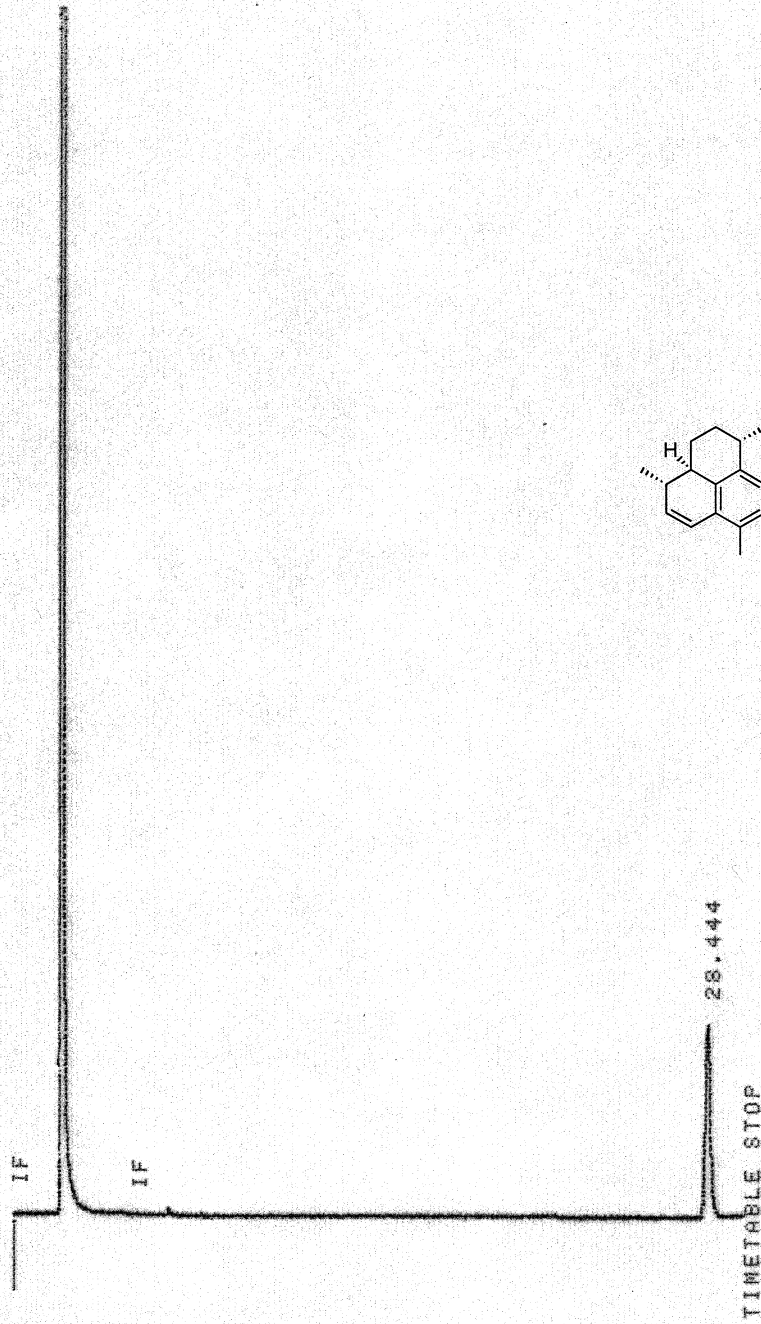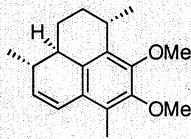

RUN# 276 FEB 27, 1901 13:22:07

| AREA% | RT     | AREA TYPE | WIDTH   | AREA%     |
|-------|--------|-----------|---------|-----------|
|       | 28.444 | 145537    | BP .240 | 100.00000 |

TOTAL AREA= 145537  
MUL FACTOR=1.00000E+00

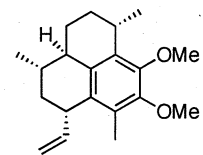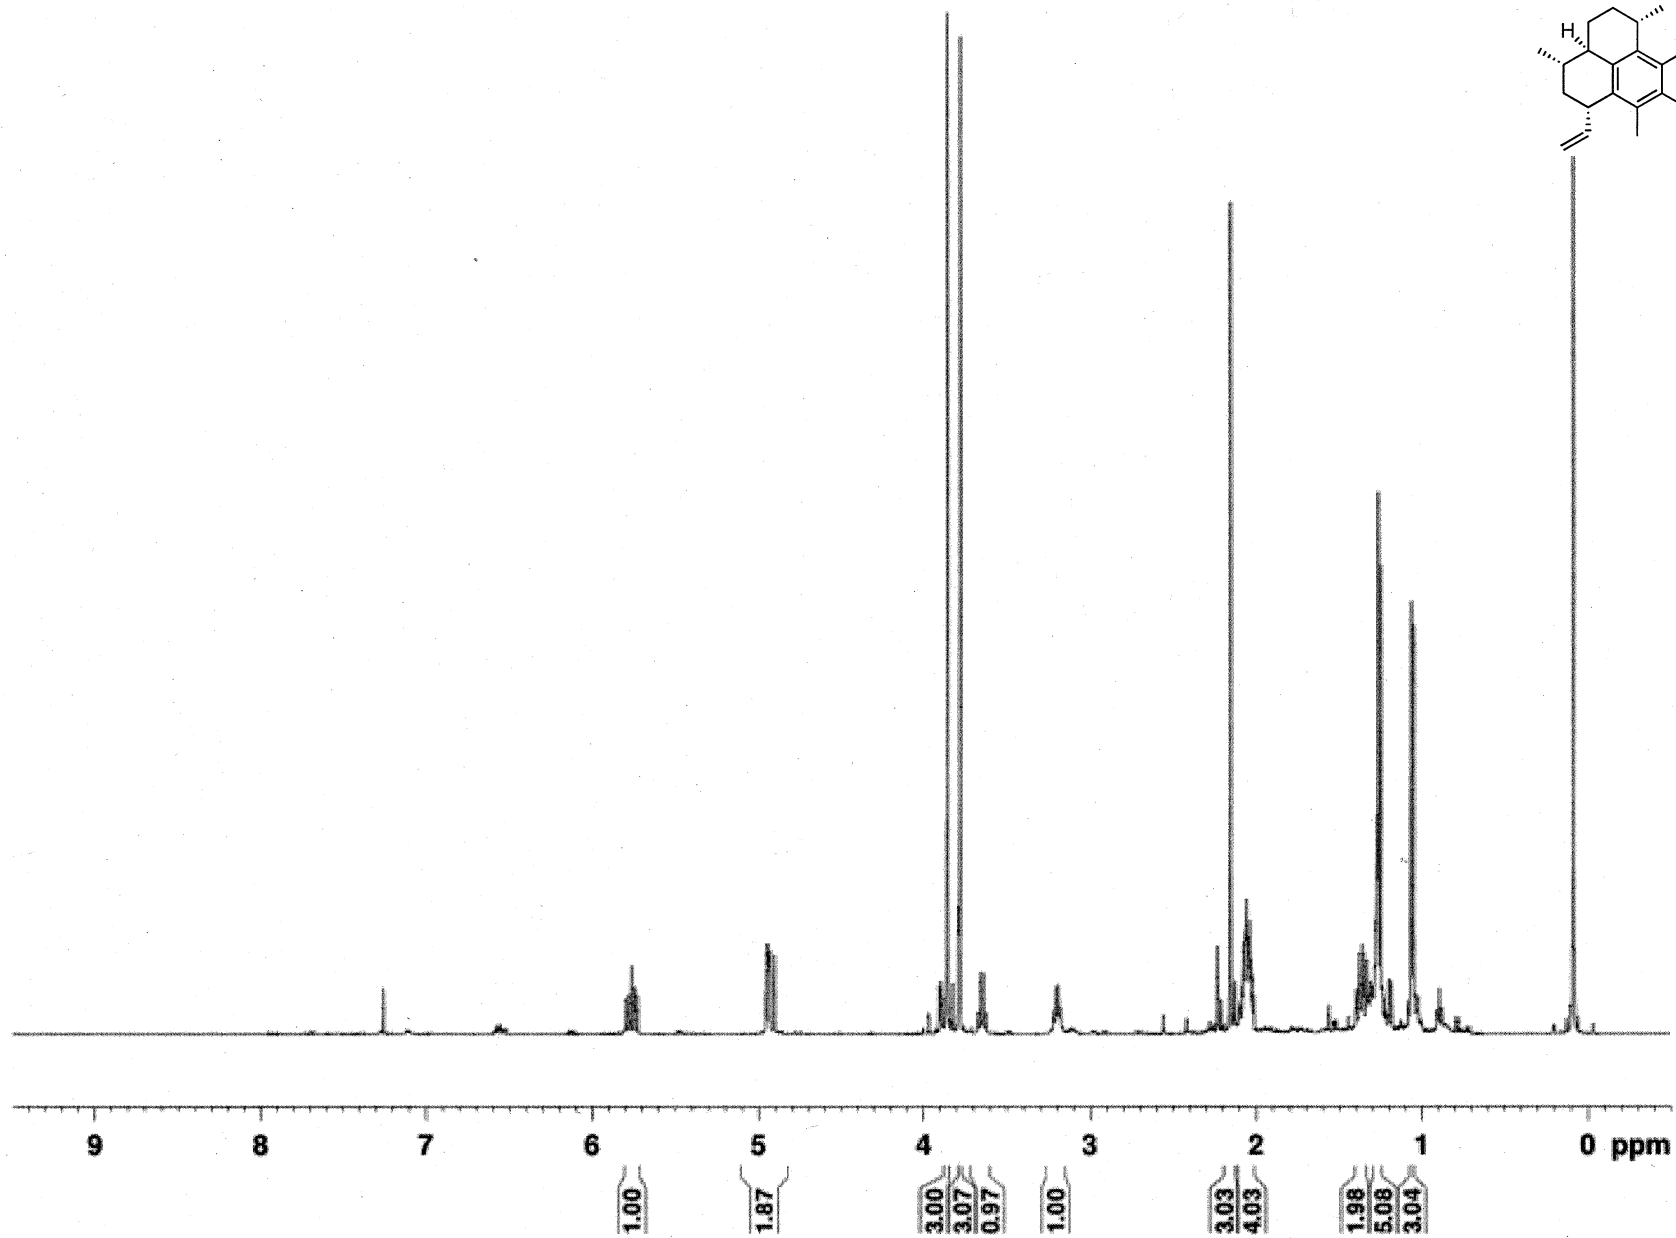

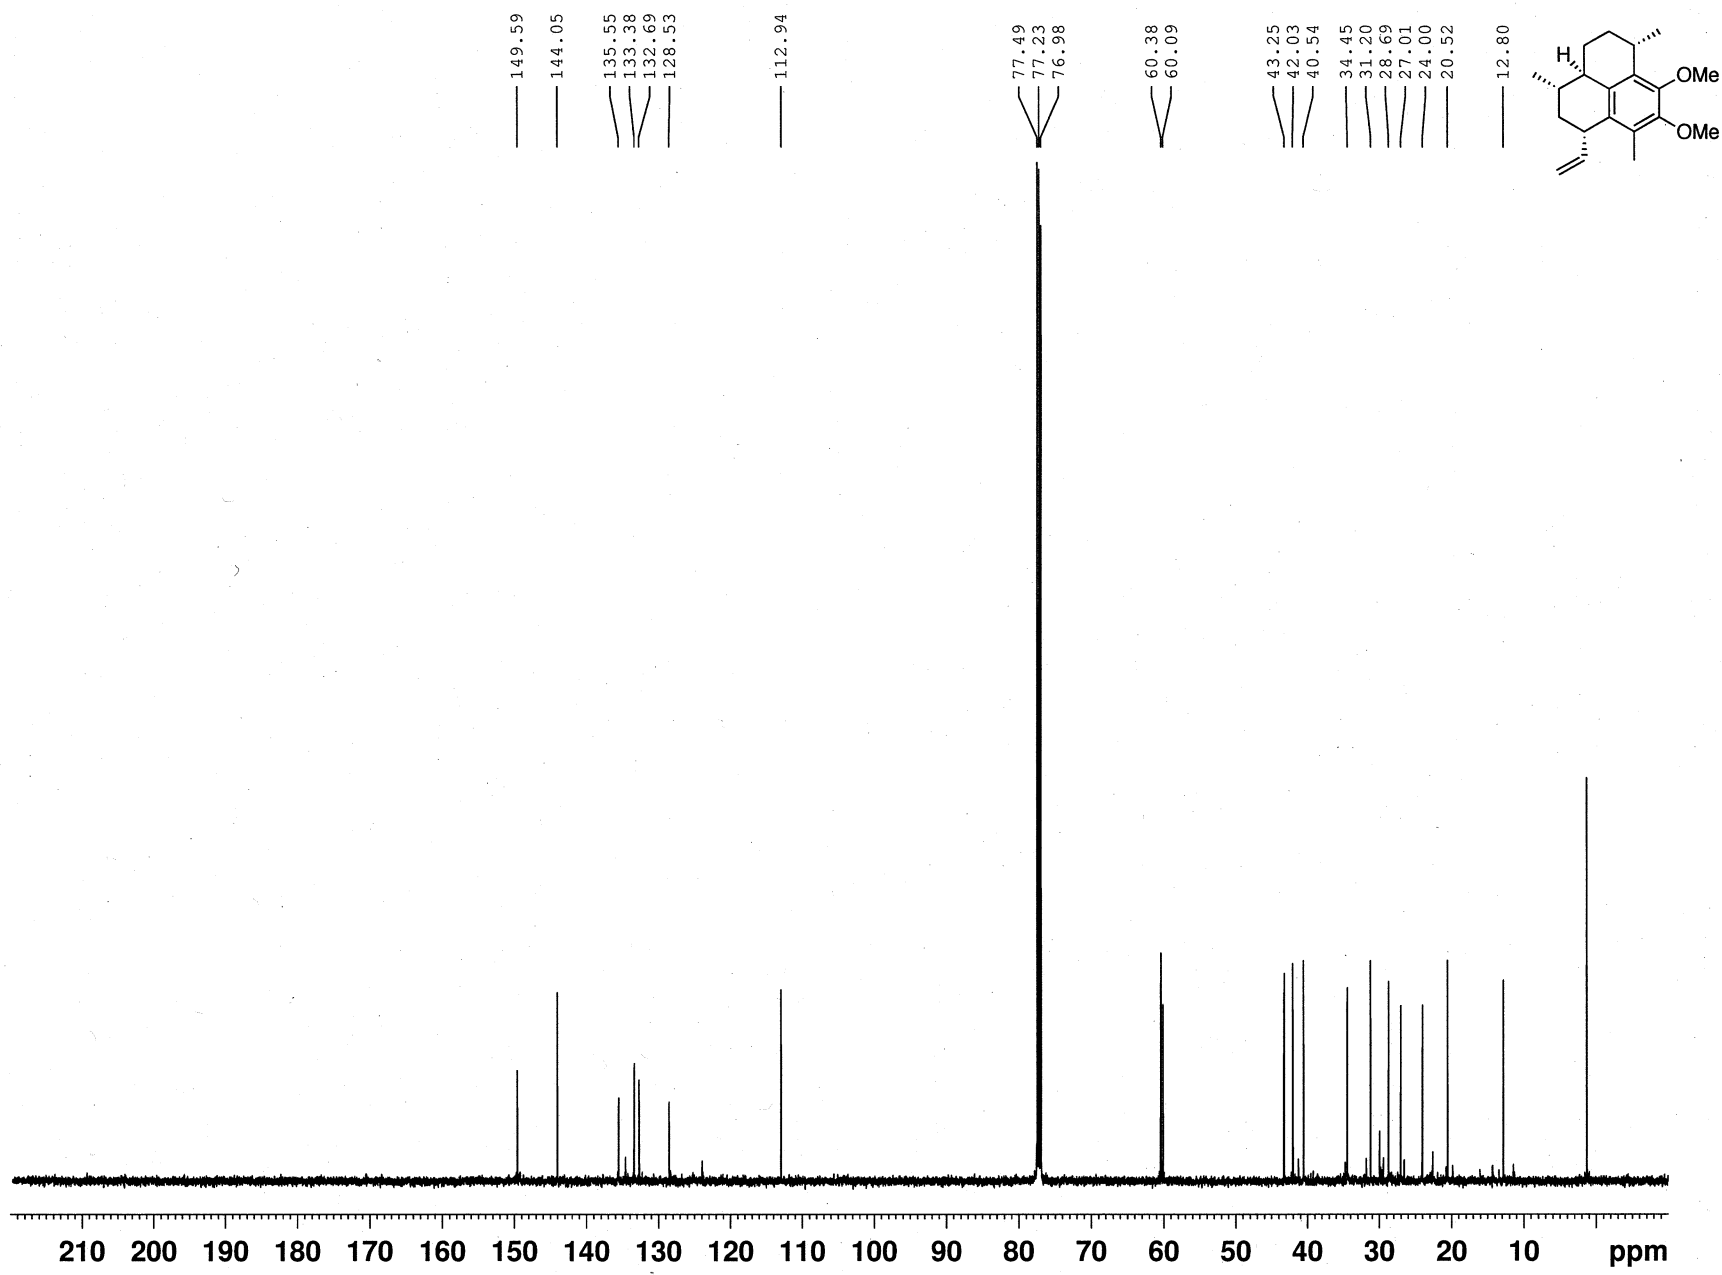

\* RUN # 377      MAR 12, 1901 13:33:55  
START

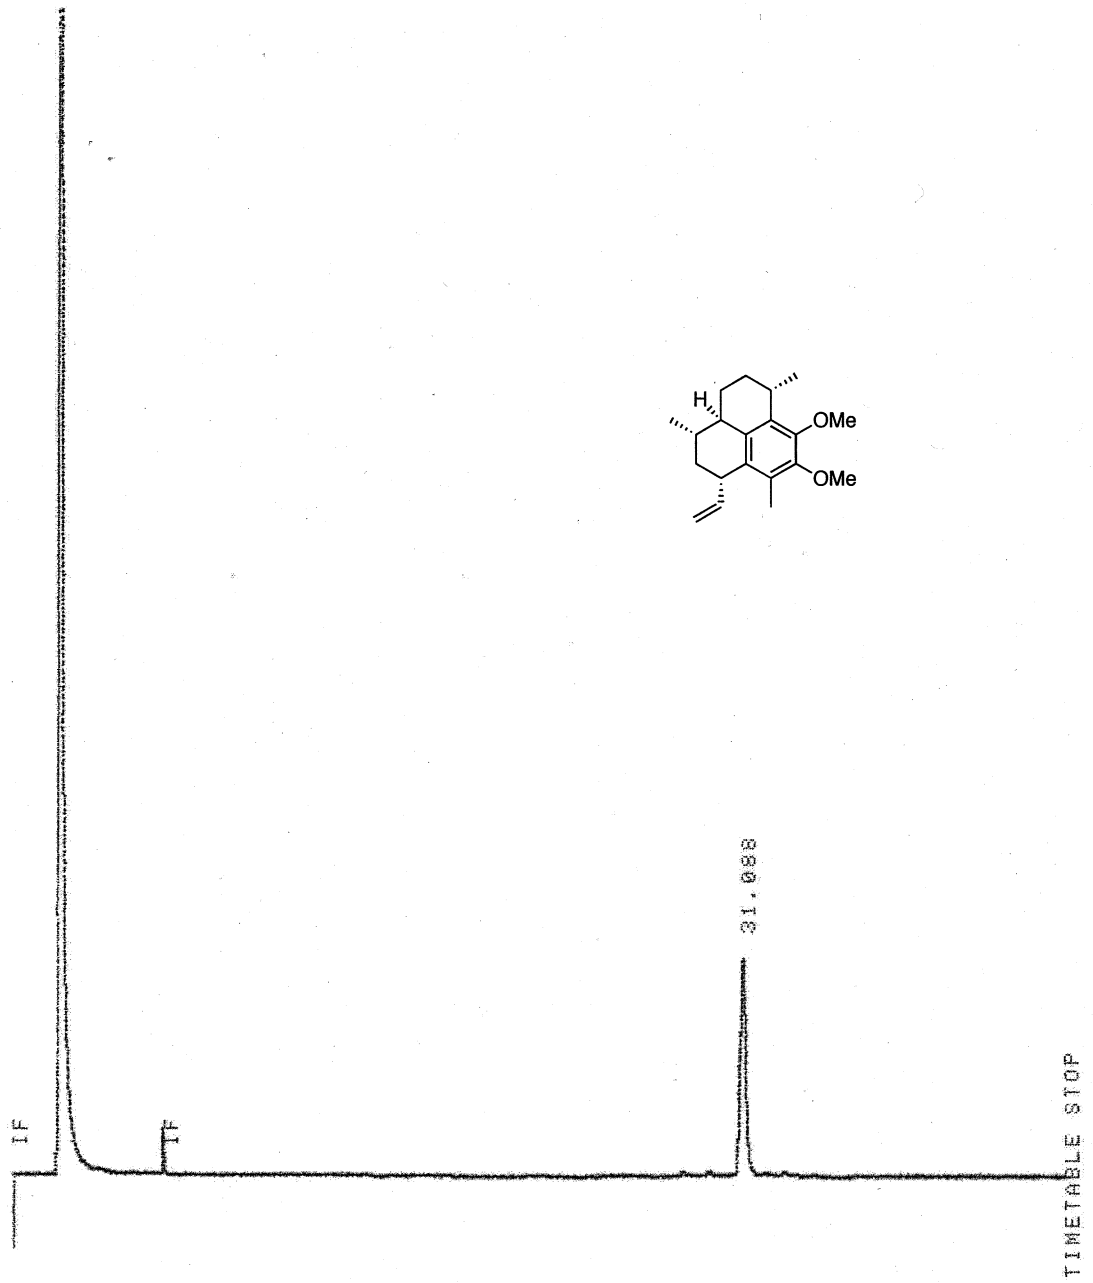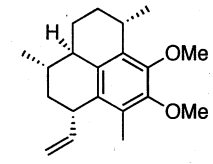

TIMETABLE STOP

RUN# 377      MAR 12, 1901 13:33:55

| AREA%  | RT     | AREA | TYPE | WIDTH     | AREA% |
|--------|--------|------|------|-----------|-------|
| 31.088 | 200559 | BV   | .278 | 100.00000 |       |

TOTAL AREA= 200559  
MUL FACTOR=1.0000E+00

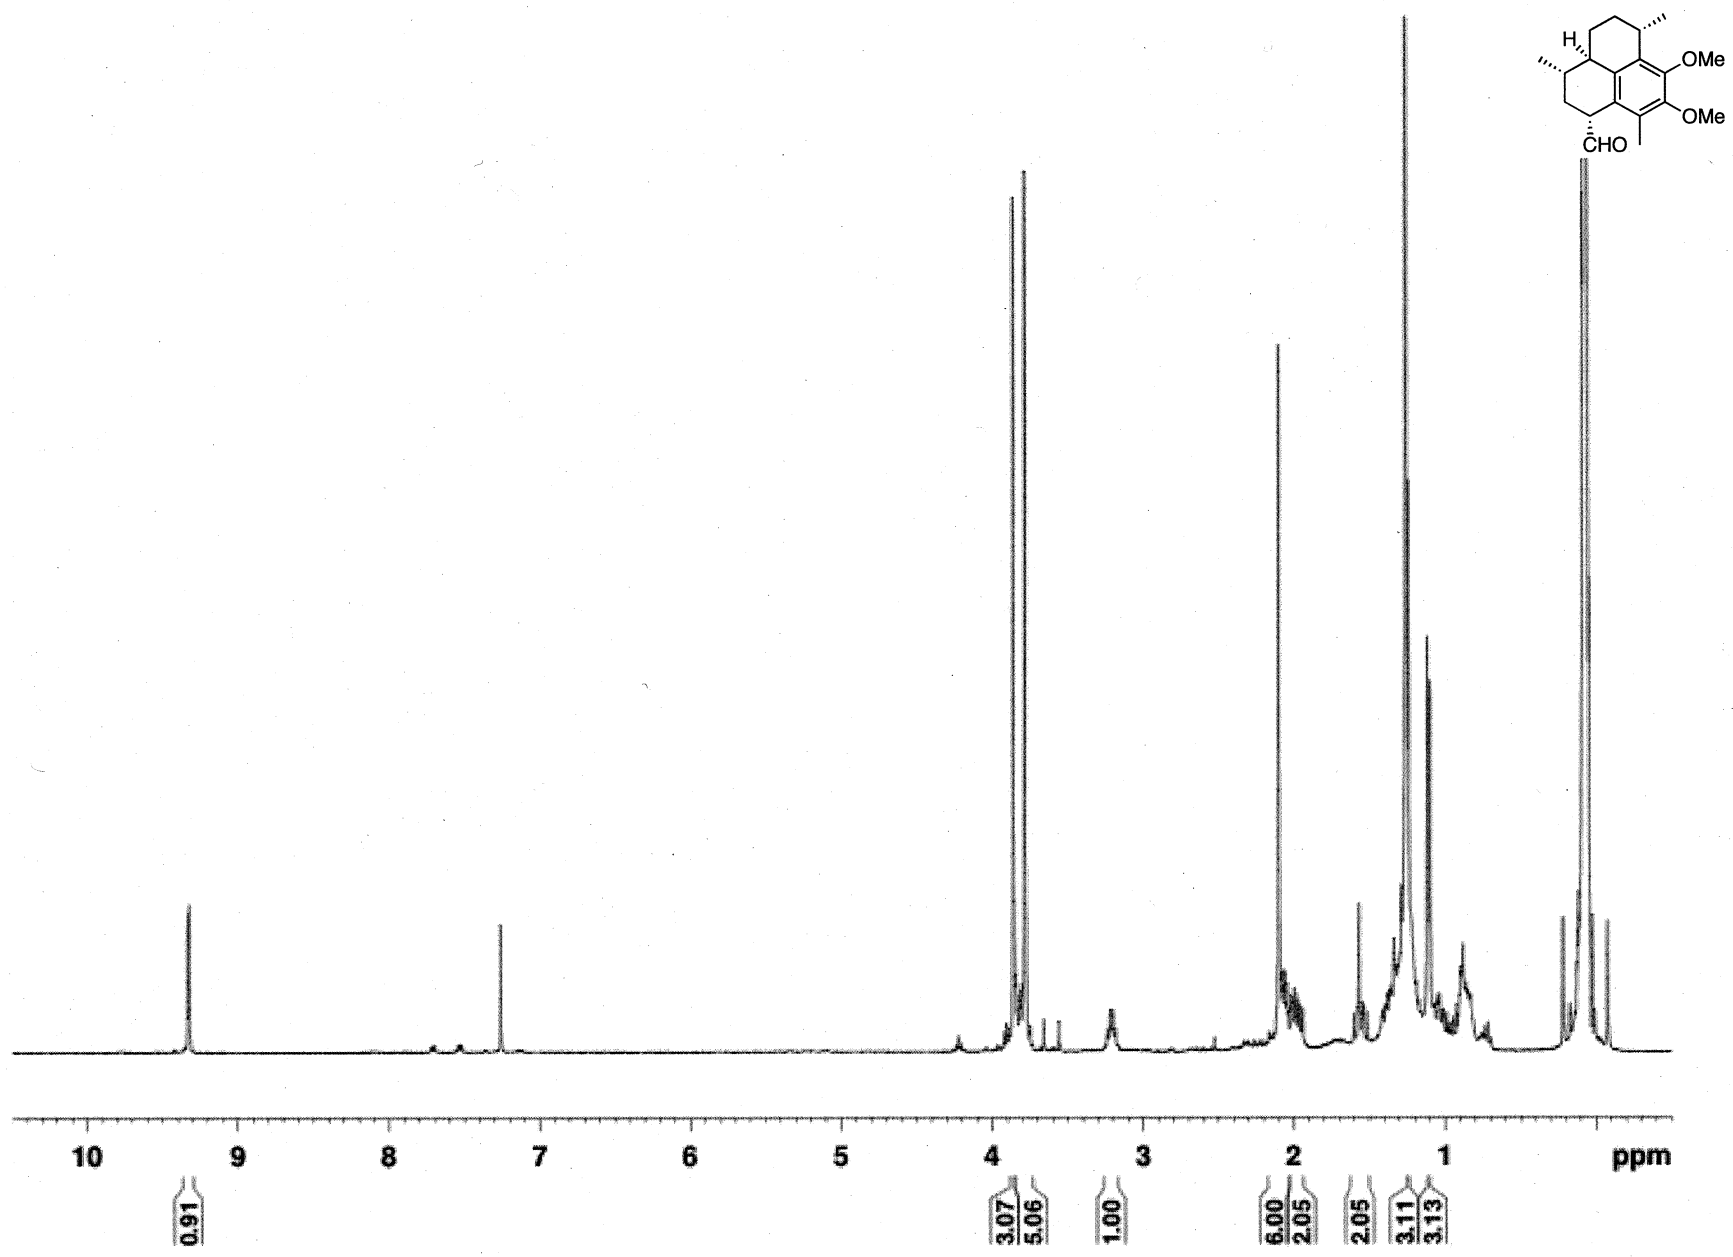

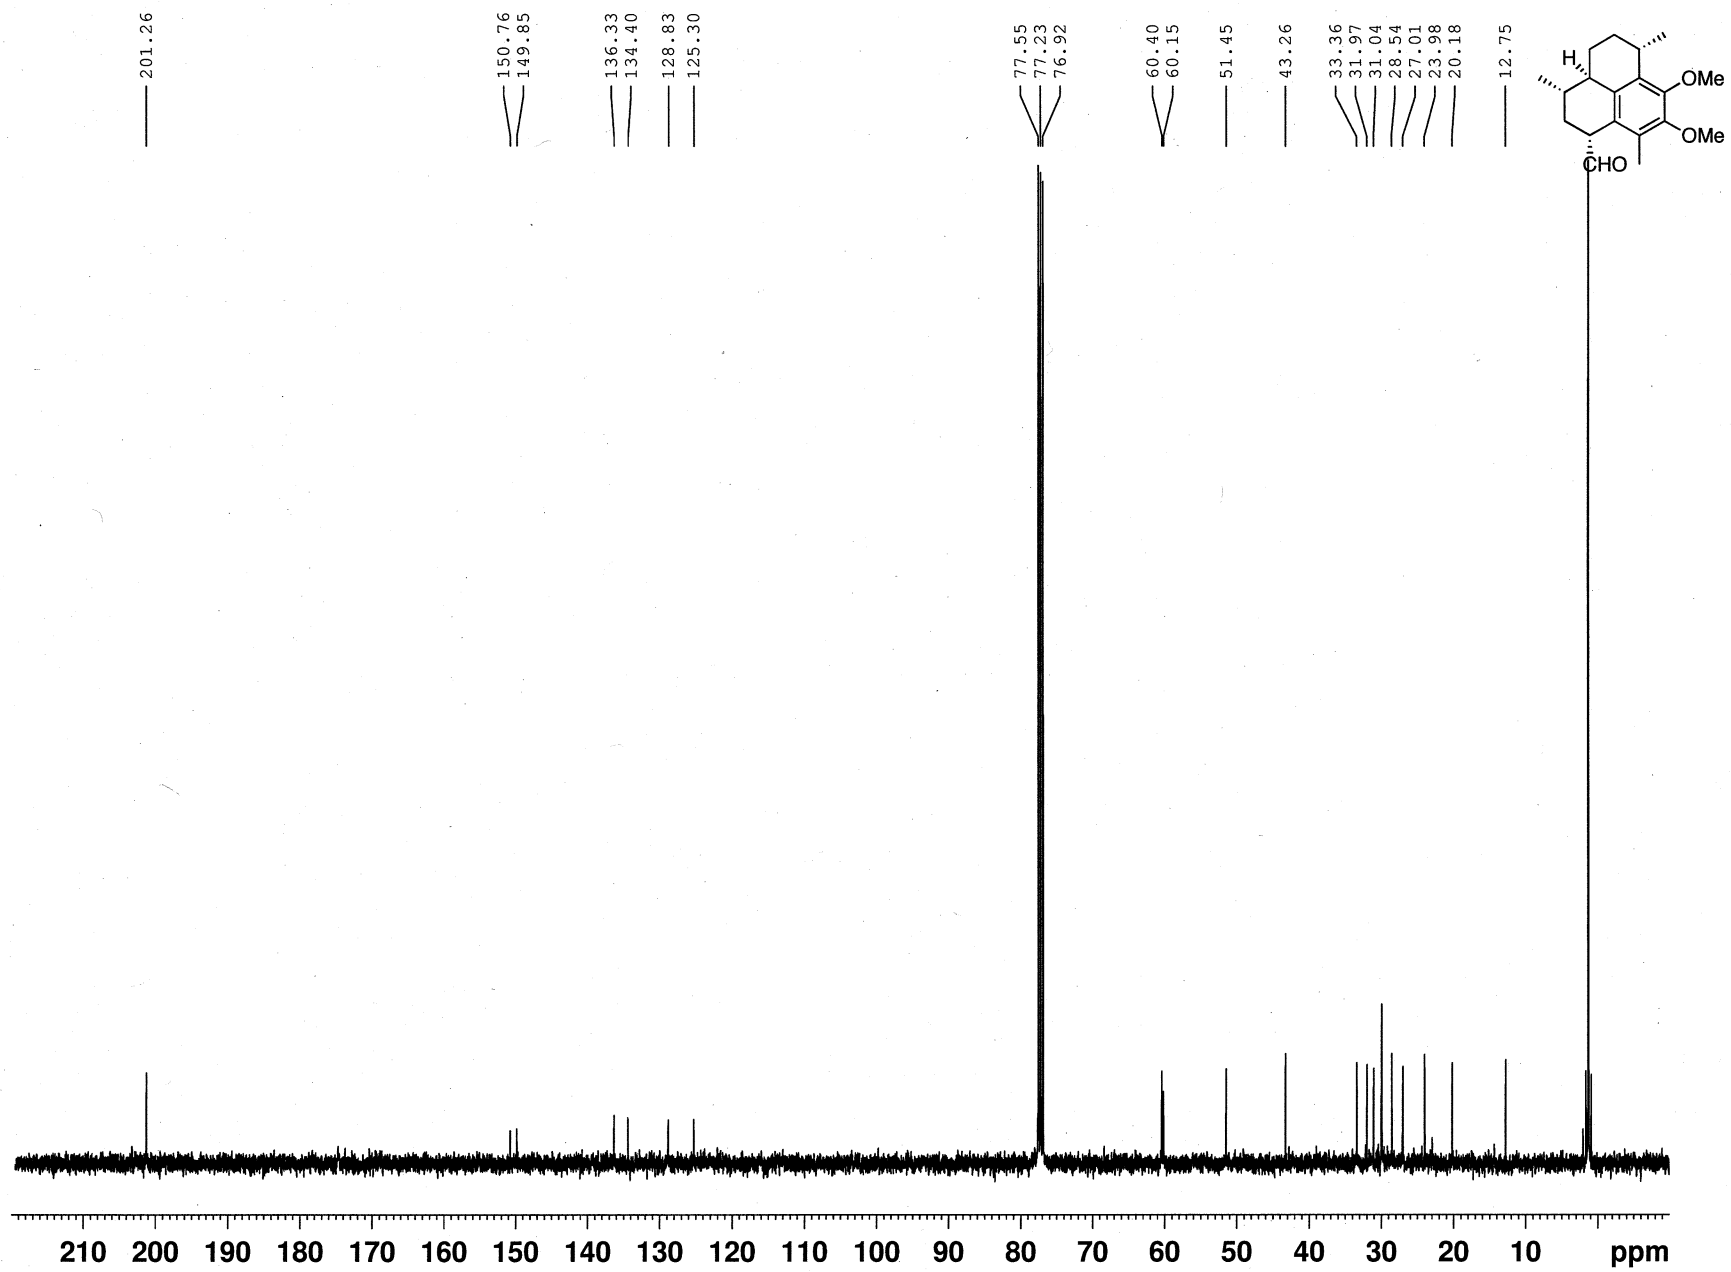



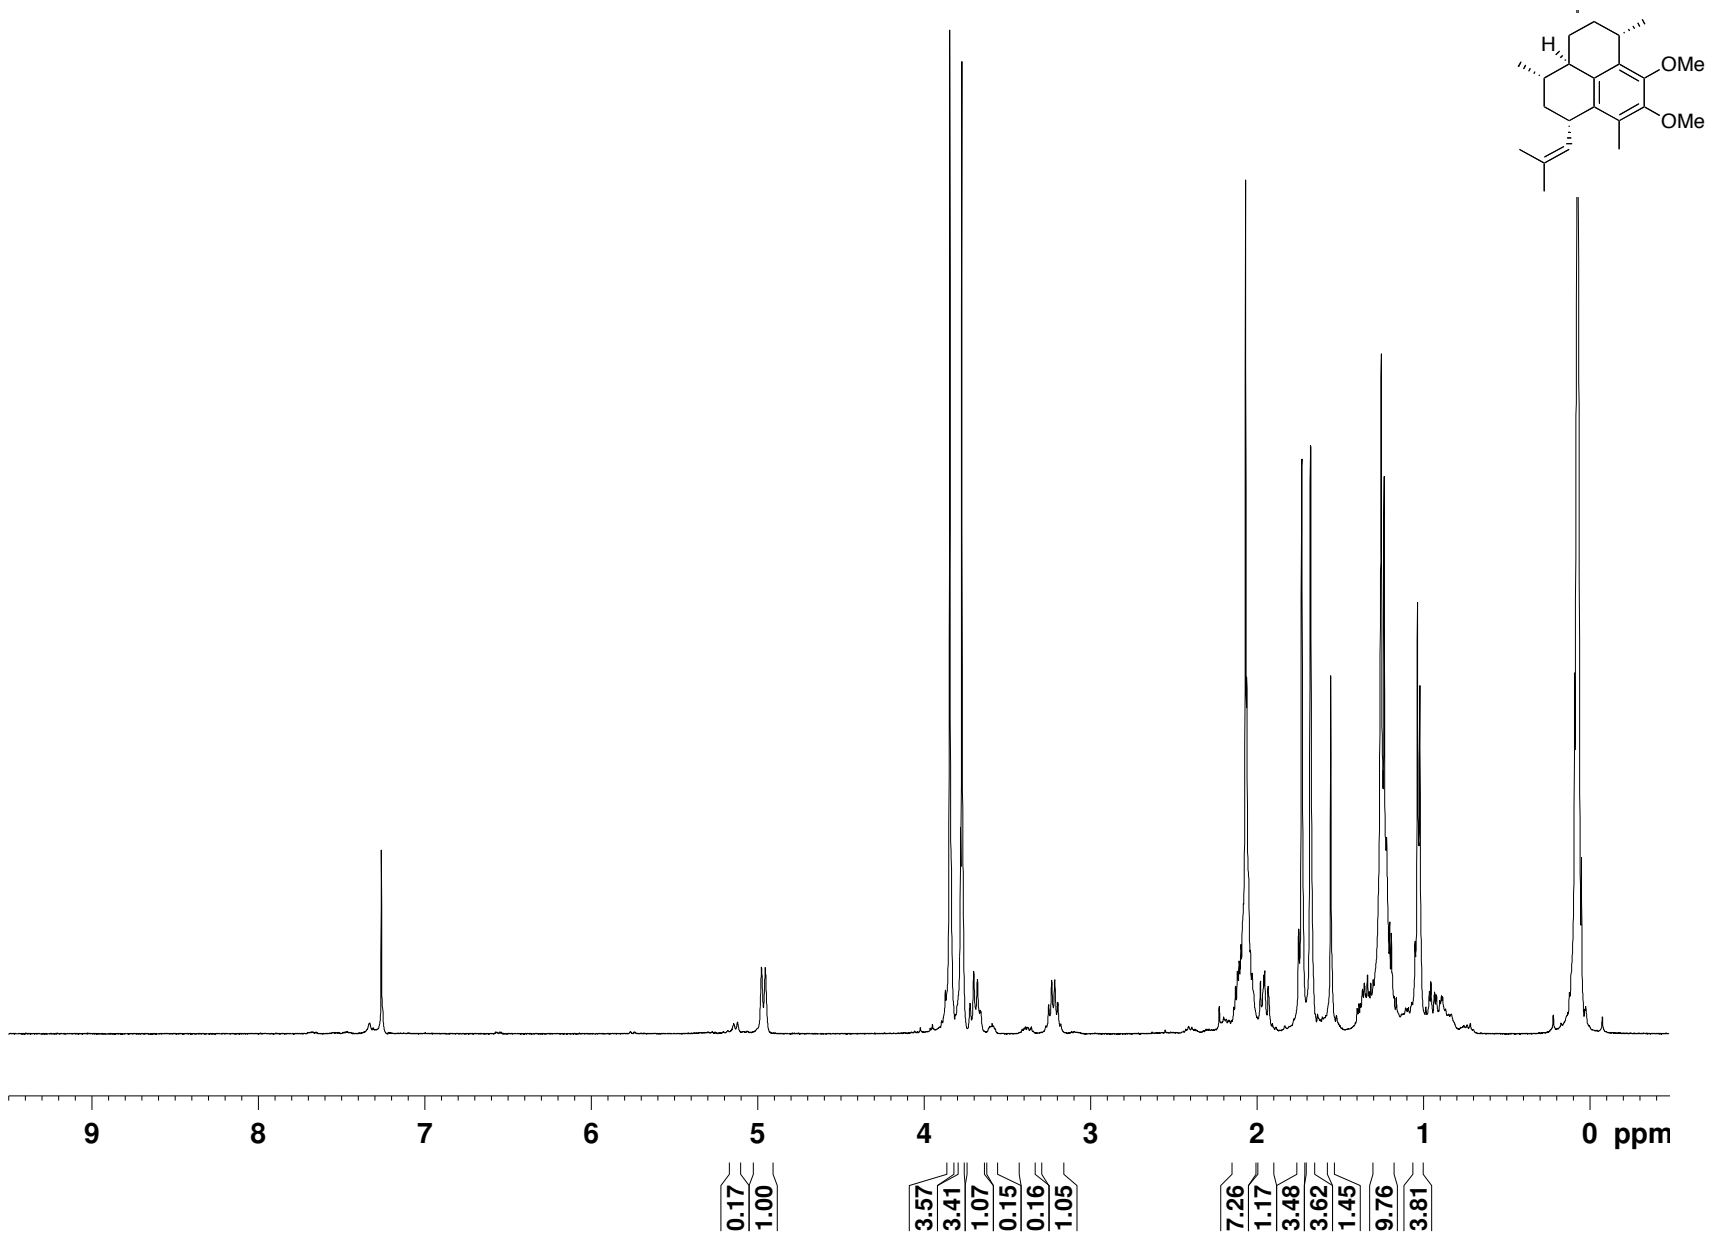

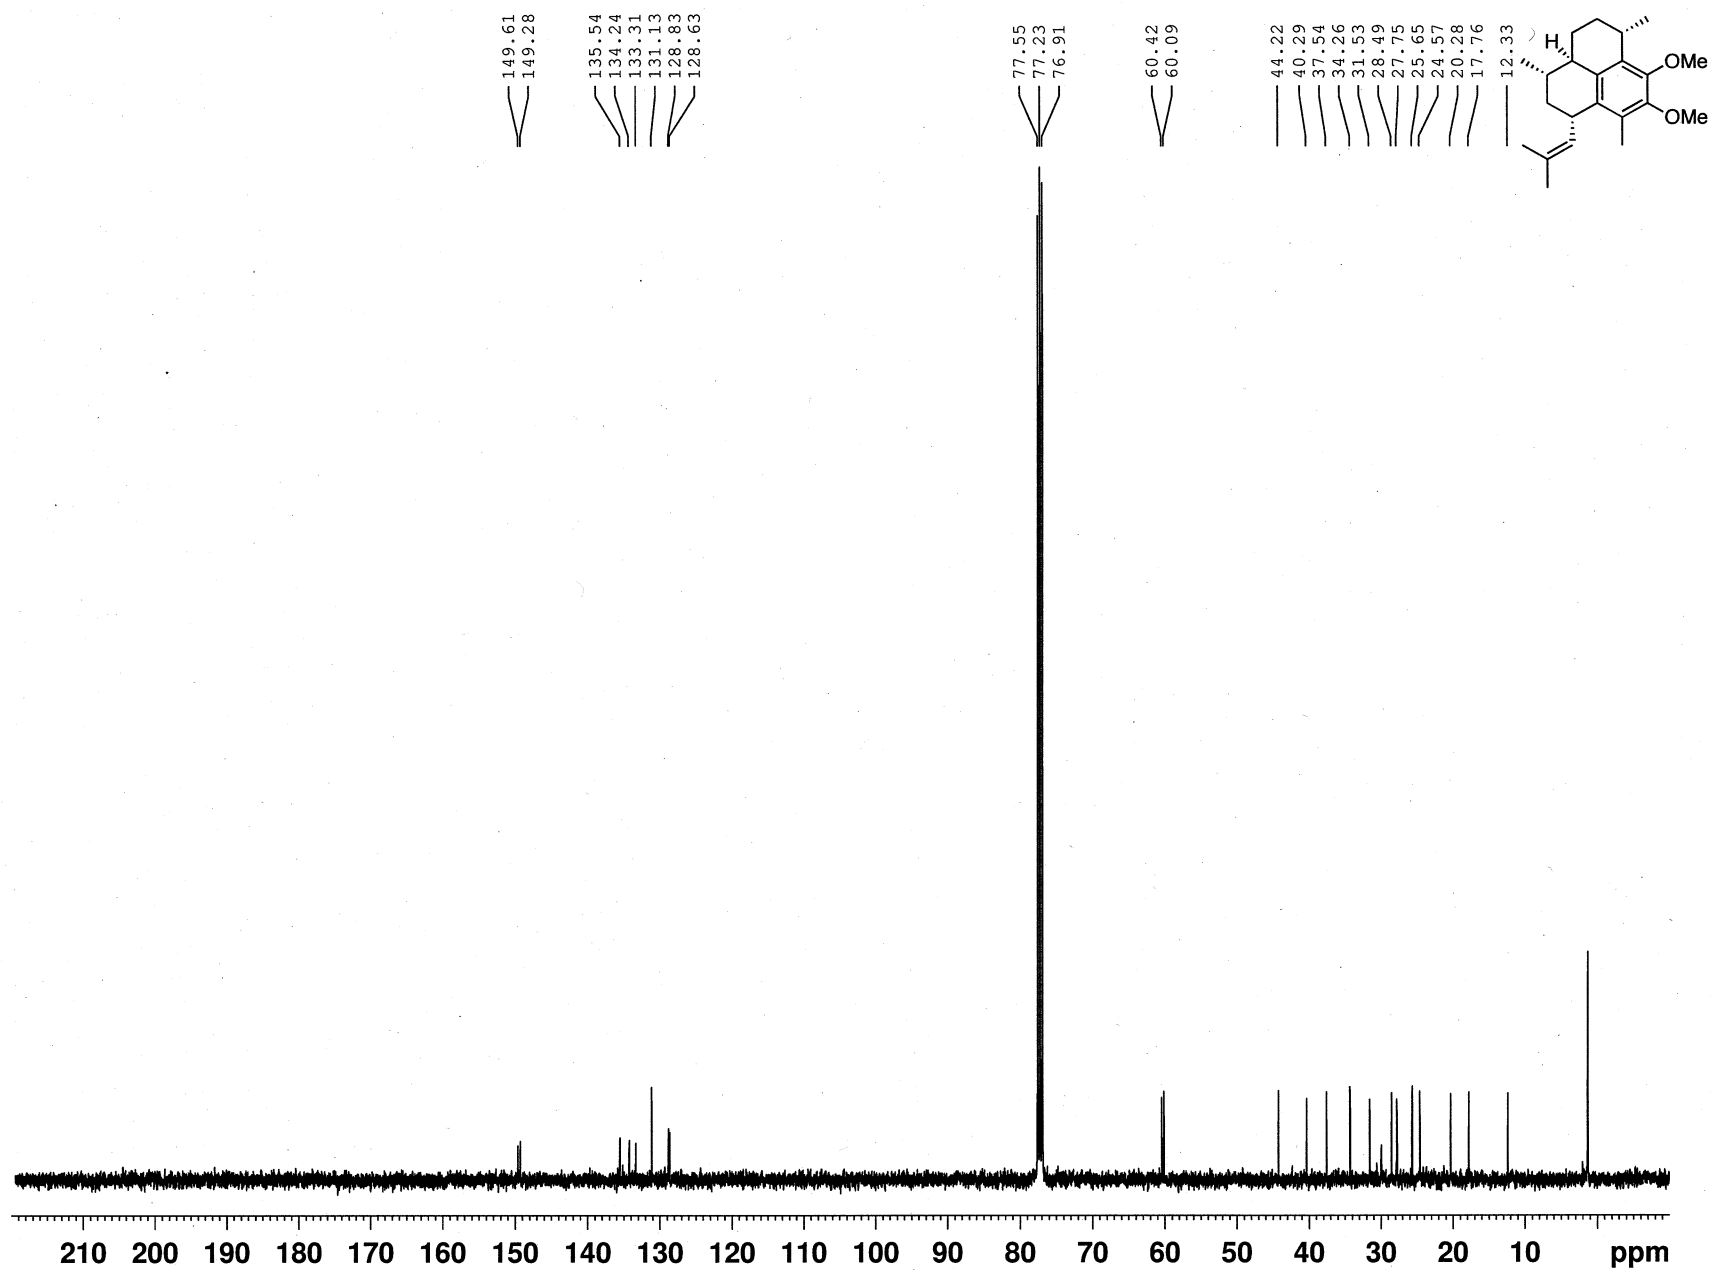

Supplement: NIHMS285032-supplement-1_si_001.pdf [file NIHMS285032-supplement-1_si_001.pdf]
